# Supplementary material for: Evidence for the effects of viewing visual artworks on stress outcomes: a scoping review
Source: PubMed Central journal article supplement — BMJ Open. 2021 Jun 30;11(6):e043549. doi: 10.1136/bmjopen-2020-043549 (PMC8246362; doi:10.1136/bmjopen-2020-043549), 2021-06-30

# BMJ Open

BMJ Open is committed to open peer review. As part of this commitment we make the peer review history of every article we publish publicly available.

When an article is published we post the peer reviewers' comments and the authors' responses online. We also post the versions of the paper that were used during peer review. These are the versions that the peer review comments apply to.

The versions of the paper that follow are the versions that were submitted during the peer review process. They are not the versions of record or the final published versions. They should not be cited or distributed as the published version of this manuscript.

BMJ Open is an open access journal and the full, final, typeset and author-corrected version of record of the manuscript is available on our site with no access controls, subscription charges or pay-per-view fees (<http://bmjopen.bmj.com>).

If you have any questions on BMJ Open's open peer review process please email [info.bmjopen@bmj.com](mailto:info.bmjopen@bmj.com)

# BMJ Open

## Evidence for the effects of Viewing Visual Artworks on Stress Outcomes: A Scoping Review

|                               |                                                                                                                                                                                       |
|-------------------------------|---------------------------------------------------------------------------------------------------------------------------------------------------------------------------------------|
| Journal:                      | <i>BMJ Open</i>                                                                                                                                                                       |
| Manuscript ID                 | bmjopen-2020-043549                                                                                                                                                                   |
| Article Type:                 | Original research                                                                                                                                                                     |
| Date Submitted by the Author: | 07-Aug-2020                                                                                                                                                                           |
| Complete List of Authors:     | Law, Mikaela; The University of Auckland, Psychological Medicine<br>Broadbent, E; The University of Auckland,<br>Karulkar, Nikita; The University of Auckland, Psychological Medicine |
| Keywords:                     | COMPLEMENTARY MEDICINE, MENTAL HEALTH, PSYCHIATRY, SOCIAL MEDICINE                                                                                                                    |
|                               |                                                                                                                                                                                       |

SCHOLARONE™  
Manuscripts

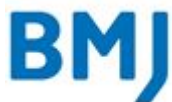

I, the Submitting Author has the right to grant and does grant on behalf of all authors of the Work (as defined in the below author licence), an exclusive licence and/or a non-exclusive licence for contributions from authors who are: i) UK Crown employees; ii) where BMJ has agreed a CC-BY licence shall apply, and/or iii) in accordance with the terms applicable for US Federal Government officers or employees acting as part of their official duties; on a worldwide, perpetual, irrevocable, royalty-free basis to BMJ Publishing Group Ltd ("BMJ") its licensees and where the relevant Journal is co-owned by BMJ to the co-owners of the Journal, to publish the Work in this journal and any other BMJ products and to exploit all rights, as set out in our [licence](#).

The Submitting Author accepts and understands that any supply made under these terms is made by BMJ to the Submitting Author unless you are acting as an employee on behalf of your employer or a postgraduate student of an affiliated institution which is paying any applicable article publishing charge ("APC") for Open Access articles. Where the Submitting Author wishes to make the Work available on an Open Access basis (and intends to pay the relevant APC), the terms of reuse of such Open Access shall be governed by a Creative Commons licence – details of these licences and which [Creative Commons](#) licence will apply to this Work are set out in our licence referred to above.

Other than as permitted in any relevant BMJ Author's Self Archiving Policies, I confirm this Work has not been accepted for publication elsewhere, is not being considered for publication elsewhere and does not duplicate material already published. I confirm all authors consent to publication of this Work and authorise the granting of this licence.

1  
2  
3 **Evidence for the effects of Viewing Visual Artworks on Stress Outcomes: A Scoping Review**  
4  
5  
6  
7

8  
9 Mikaela Law (MHLthPsysc), Nikita Karulkar (BSc) & Elizabeth Broadbent (PhD)  
10  
11  
12

13  
14  
15 All authors are affiliated with the Department of Psychological Medicine, The University of  
16 Auckland, Private Bag 92019, Auckland 1142, New Zealand  
17  
18  
19  
20  
21  
22  
23  
24

25 **Corresponding author:**

26 Elizabeth Broadbent

27 [e.broadbent@auckland.ac.nz](mailto:e.broadbent@auckland.ac.nz)

28 The University of Auckland

29 Building 507,

30 28 Park Avenue, Grafton, 1023

31 Auckland, New Zealand

32 [+64 9 923 6756](tel:+6499236756)  
33  
34  
35  
36  
37  
38  
39  
40  
41  
42  
43  
44

45 **Word Count: 3997**  
46  
47  
48  
49  
50  
51  
52  
53  
54  
55  
56  
57  
58  
59  
60

## **Abstract**

**Objective:** To review the existing evidence on the effects of viewing visual artworks on stress outcomes and outline any gaps in the research.

**Design:** A scoping review was conducted based on the Joanna Briggs Institute methodology for scoping reviews and using the preferred reporting items for systematic reviews and meta-analyses extension for scoping reviews. Two independent reviewers performed the screening and data extraction.

**Data Sources:** Medline, Embase, APA PsycINFO, Cochrane CENTRAL, Scopus, Google Scholar, Google, ProQuest Theses and Dissertations Database, APA PsycExtra and Opengrey.eu were searched in May 2020.

**Eligibility Criteria:** Studies were included if they investigated the effects of viewing at least one visual artwork on at least one stress outcome measure. Studies involving active engagement with art, review papers or qualitative studies were excluded. There were no limits in terms of year of publication, contexts or population types; however, only English studies were considered.

**Data Extraction and Synthesis:** Information extracted from manuscripts included: study methodologies, population and setting characteristics, details of the artwork interventions, key findings and details related to methodological quality.

**Results:** 14 primary studies were identified, with heterogeneous study designs, methodologies and artwork interventions. The results of these studies demonstrated consistent reductions in self-reported stress after viewing artworks, but mixed effects on physiological stress measures. The methodological quality of the studies was poor, with many important methodological details missing.

**Conclusions:** There is promising evidence for effects of viewing artwork on reducing stress. Moderating factors may include setting, individual characteristics, artwork content, and viewing instructions. More robust research, using more standardised methods and randomised controlled trials, are needed before full conclusions can be made.

**Registration Details:** A protocol for this review is registered with the Open Science Framework ([osf.io/gq5d8](https://osf.io/gq5d8)).

### Strengths and Limitations of this Study

- A comprehensive scoping review was conducted using a broad and inclusive search strategy and a large variety of databases were searched.
- The reviewers independently followed a structured and pre-published protocol for searching, screening and extracting data which followed the Joanna Briggs Institute methodology for scoping reviews and PRISMA-ScR guidelines.
- Only English studies were included, possibly resulting in articles of other languages being missed.
- Slight deviations in the original protocol were performed in order to make the data screening more feasible.

For peer review only

## Introduction

A number of studies suggest that participation in the arts is beneficial for health. This has resulted in a proliferation of different arts programmes. Many healthcare and workplace settings offer art programmes to reduce stress and improve wellbeing for staff, patients and customers[1]. However, there is little evidence that these programmes have the desired effects and there is a need for a high-quality evidence base for art-based interventions[2, 3].

Engagement with arts can be divided into active and passive participation. Active participation involves making, creating or teaching arts; whereas passive participation involves behaviours such as observing, viewing, listening and watching art[4, 5]. Passive viewing of artworks is an easy, low-cost and non-invasive intervention; however, research is lacking compared to the substantial evidence base for the active participation in artwork making and art therapy. This scoping review focused on the effects of passively viewing visual artworks and therefore excluded research pertaining to the active participation in arts.

There is some evidence that viewing artworks is beneficial; however, this evidence is not of uniformly high quality, is rarely critical, and is sparse, with many important theoretical and evidential gaps. As well as this, most of the evidence comes from anecdotes, descriptions and personal experiences, rather than empirical research[6, 7]. Although many settings have been used within this research, including healthcare, art museums and laboratories, there is a paucity of evidence to demonstrate whether these settings affect outcomes differently. Demographics may be important moderators as ethnicity, gender and age may influence preferences for certain types of artworks. However, rigorous research has yet to be conducted examining the influence of settings and populations.

Due to these limitations, it is important to review the existing evidence and identify any research gaps that need to be addressed. As the evidence base is small and heterogeneous, a systematic review cannot be accurately completed, so instead a scoping review was conducted. The results can be used to direct future research to fill these gaps before a full systematic review can be completed.

There is no universally accepted definition of artworks as this construct has been inconsistent and debated. For the purpose of this review, artwork was defined as two-dimensional artistic works made primarily for their aesthetics, rather than any functional purpose. This definition was created from working definitions of visual and fine arts used in previous research[8, 9]. Based on this definition, this review included studies on paintings, drawings and prints and excluded studies on sculpture, films, interior design or architecture. Photographs were only included if they depicted artworks. Digital artworks were included.

Viewing artworks is a form of visual environmental enrichment and is theorised to be stress-reducing through positive distraction[6, 10]. To explore this theory, the review focused on the effects of viewing visual artworks on stress outcomes. Both psychological and physiological stress outcomes were included.

## Objective and Research Questions

The aim of this scoping review was to systematically examine the extent of existing research available on the effects of viewing visual artworks on stress outcome measures and identify knowledge gaps to aid future research. The following research question was formulated: what research has been conducted on the effects of viewing visual artworks on stress outcomes in any populations and settings?

Several secondary questions were developed:

- What populations and settings were studied?
- What stress outcomes were measured?
- What type and content of artworks were viewed?
- What was the duration of the artwork viewing and how many artworks were viewed?
- Were the interventions effective in changing the outcomes?
- What is the methodological quality of the existing studies?

A preliminary search for previous reviews on this topic was conducted on Google Scholar, JBI Evidence Synthesis and the Cochrane Database of Systematic Reviews prior to creating the protocol.

## **Methods**

### **Protocol**

A scoping review protocol was developed based on the Joanna Briggs Institute methodology for scoping reviews[11] and using the preferred reporting items for systematic reviews and meta-analyses extension for scoping reviews (PRISMA-ScR). The objectives, eligibility criteria and methods were specified in advance and documented in the protocol registered at [osf.io/gq5d8](https://osf.io/gq5d8).

### **Eligibility criteria**

Studies had to meet the following inclusion criteria; be a primary study where participants passively viewed at least one visual artwork as an intervention, including viewing paintings, drawings, prints, digital artwork, or photographs of artworks, and measured at least one stress outcome measure (physiological or psychological indices). Measures of anxiety or mood were not considered as direct measures of stress and therefore fell out of the scope of this review. Unpublished research, including working papers, theses/dissertations and conference proceedings were included.

Studies were excluded if participants had active engagement in the arts (e.g. studies on art therapy or the production/creation of art), the study investigated the effects of interior design, architecture, sculpture, films or photography not depicting artworks, and review papers, including systematic reviews, scoping reviews and meta-analyses.

Due to the small and heterogeneous nature of this research area, there were no restrictions in terms of populations, contexts, dates of publication or study designs. However, during the screening phase, it was decided to exclude qualitative studies as these studies did not have clear stress outcomes, which was a key inclusion criterion. Only English studies were considered.

### **Search Strategy**

To identify potentially relevant studies, the following electronic databases were systematically searched; Medline, Embase, APA PsycINFO, Cochrane CENTRAL, Scopus and Google Scholar (first 30 pages), with the help of a subject librarian. The search string combined a set of artwork and stress terms within each set with "OR" and between the two sets with "AND." The search was first conducted using an extended list of search terms from the registered protocol; however, this search strategy resulted in a large number of irrelevant articles. Therefore, in the final search, some of the more ambiguous search terms were removed to refine the search further. For example, the term 'drawing' was removed as this could refer both to artistic drawings and 'drawing' blood. The final search strategies for two example databases are presented in Table 1.



1  
2  
3 The grey literature was searched using the same search terms to identify any unpublished studies.  
4 Grey literature databases searched included; Google (limited to the first 20 pages), ProQuest theses  
5 and dissertations database, APA PsycExtra and OpenGrey.eu.  
6

7 A search was then conducted by hand of the reference lists of relevant identified articles. Lastly, the  
8 'cited by' feature of Google Scholar was used to see if any of the relevant studies had been cited by  
9 undetected articles. All extracted references from these searches were imported to RefWorks and all  
10 duplicates removed. The final search was executed on 27 May 2020. The number of studies  
11 identified by the search strategy is shown in Figure 1.  
12  
13

### 14 **Screening and Study Selection**

15  
16 Screening of the studies identified by the search strategy was conducted by two independent  
17 reviewers using a two-staged approach using the programme Covidence. Due to the high volume  
18 and large amount of unrelated studies identified, one author initially screened the titles and  
19 removed any irrelevant studies, before the first stage. In the first stage of screening, two reviewers  
20 independently screened the abstracts for the eligibility criteria. If a study's eligibility was judged to  
21 be uncertain, the article was included in the second stage. In the second stage, two reviewers  
22 screened the full texts of the studies to determine final inclusion or exclusion based on the eligibility  
23 criteria. The two stages were conducted by the reviewers independently, with the results of each  
24 stage discussed. Any disagreements related to eligibility of an article were discussed and agreement  
25 was reached. The number of included and excluded studies at each stage of the screening procedure  
26 is shown in Figure 1, with reasons for exclusion.  
27  
28  
29

### 30 **Data Extraction and Analysis**

31  
32 Data was extracted from each included study into a charting form by the two reviewers  
33 independently. This charting form was developed in accordance with the review questions. It  
34 included; publication details (i.e. title, year, authors), methodology (i.e. aims, design, population  
35 characteristics, setting, outcomes), artwork details (i.e. type and content of artwork, duration of  
36 artwork viewing, number of artworks), key findings related to scoping review questions, and items to  
37 assess methodological quality (i.e. registration details, comparator groups, randomisation, blinding,  
38 power analyses).  
39  
40

41 The charting form was iteratively refined during the extraction process to ensure all useful  
42 information was extracted. The charting form was first independently pilot tested by the two  
43 reviewers on a random sample of four studies. The reviewers discussed this process and amended  
44 the charting form by adding a column about the artwork viewing directives given to the participants.  
45 Data extraction was then completed for the remaining studies independently by the two reviewers  
46 and any inconsistencies were discussed. This extracted data is reported in tabular and descriptive  
47 text format to answer the review questions.  
48  
49

### 50 **Patient and Public Involvement**

51 Patients and the public were not involved in any phase of this review.  
52  
53

### 54 **Results**

55  
56 As shown in Figure 1, the search strategy resulted in 3882 texts, which were screened for eligibility.  
57 After the initial title and abstract screening, the full text was retrieved for 53 articles and examined  
58 against the eligibility criteria. During this process, three theses were found to have matching  
59 published journal articles and therefore were excluded as duplicates. The remaining excluded  
60

1  
2  
3 articles did not meet the eligibility criteria. This screening narrowed the studies down to 14 articles  
4 for inclusion.  
5

6 The design and key findings related to the stress outcomes of each study are briefly detailed in Table  
7 2, with specific details regarding the secondary review questions provided in Table 3. All 14 articles  
8 were primary studies published as journal articles. Apart from the duplicate theses mentioned  
9 above, no grey literature met the eligibility criteria for inclusion. The studies' publication dates  
10 ranged from 1972 to 2020. Eight studies came from Europe, four from the United States of America  
11 and one each from Australia and New Zealand.  
12  
13

### 14 **Summary of Study Methodologies**

15  
16 **Designs.** The 14 studies had very different designs and methodologies (see Table 3). Only nine  
17 studies used a between groups design. Another four used a within groups design, where measures  
18 were compared pre- to post-viewing the artworks, with no comparator groups. The final study used  
19 a cross-sectional design, measuring stress-reduction at one time-point.  
20

21 Of the nine between groups designs, six used a no artwork control group as a comparator, and one  
22 used scrambled versions of the artworks. Although the remaining two studies had comparator  
23 groups, the viewing directives given to the groups[12] and the art experience of the participants in  
24 each group[13] were different, rather than the artwork viewed.  
25  
26

27 **Settings.** Six studies were conducted in an art gallery or museum, three in a laboratory, four in  
28 hospital rooms or hospital public spaces, and one in senior citizens' apartments. These settings  
29 represent a mix of both naturalistic settings with high ecological validity and laboratory settings with  
30 high experimental control.  
31  
32

33 **Populations.** The majority of studies investigated healthy participants in the form of students (n=3),  
34 office workers (n=1) or the general public (n=4). Other research used patient populations known to  
35 have high stress levels. Four studies investigated hospitalised patients, with two being paediatric  
36 samples. Lastly, D'Cunha et al[14] investigated people living with dementia and Wikström et al[15],  
37 elderly women.  
38

39 There is little research on whether population type affects stress reactions. Very few studies  
40 compared demographic factors, with the following exceptions. De Jong[13] found that having  
41 different art experience affected outcomes. Three studies found significant differences between the  
42 stress-reducing effects of viewing artwork between males and females[8, 16, 17]. Lastly, one study  
43 compared results across different health conditions, but found similar results between groups[18].  
44  
45

46 **Outcomes.** Nine studies explored only physiological stress measures, three explored only  
47 psychological stress measures and the remaining two explored both. The psychological stress  
48 measures included; the Cox Mackay Stress Arousal checklist[19], a stress adjective checklist[20],  
49 Likert scales, and a distress thermometer[21]. The physiological measures were mainly  
50 cardiovascular, including blood pressure, heart rate and skin conductance, which were measured in  
51 eight studies. Salivary biomarkers were measured in three studies including cortisol, alpha-amylase  
52 and interleukin-6. Respiration was measured in two studies.  
53  
54

### 55 **Summary of the Artwork Interventions**

56  
57 **Types of artworks.** 10 studies used physical artworks. Most were original paintings, however one  
58 study used posters depicting artworks[17] and another used a window mural[22]. Another three  
59 studies used digital reproductions of artworks. Two used slideshows of digital images[13, 23],  
60

1  
2  
3 whereas the third used the Open Window, which digitally projected artworks[7]. The last study  
4 directly compared physical artworks with their digital reproductions[24]. This study did not find any  
5 differences between the types of artwork, indicating that digital reproductions may be just as stress-  
6 reducing as physical artworks.  
7

8  
9 **Content of artworks.** The content ranged from representational nature images, to complex abstract  
10 artworks. Four studies provided an assortment of artwork content in one exhibition and therefore it  
11 could not be determined whether content was influential. Two studies investigated the effects of  
12 abstract artwork but did not compare these to another artwork type. Another study[13] compared  
13 the physiological effects of artworks rated to be 'ugly' or 'beautiful.' Although the exact content of  
14 the artwork was not described, this study did find that participants had higher skin conductance and  
15 respiration rates while viewing the 'beautiful' paintings, compared to the 'ugly' paintings,  
16 demonstrating that the aesthetic content of the artwork may influence their effects.  
17  
18

19 Another four studies investigated the effects of viewing nature artworks. Two studies found that  
20 self-reported stress was lower when viewing nature artworks compared to abstract artworks[8, 17].  
21 One study found that different aspects of nature might have stronger effects; a forest mural resulted  
22 in larger blood pressure decreases than an aquatic mural[22]. Nature content may also affect  
23 biological indicators of stress responses; cortisol levels decreased faster after a stressor in people  
24 viewing scrambled versions of nature artworks, compared to the original nature artworks[23].  
25  
26

27 The remaining two studies did not report on the content of the artwork and therefore, cannot be  
28 categorised.  
29

30 **Duration of artwork viewing.** Nine studies reported the duration participants spent looking at the  
31 artwork (see Table 3). This ranged from two minutes to over 48 hours. No study investigated  
32 whether changing the duration of exposure to artworks affected stress outcomes.  
33  
34

35 **Quantity of artworks.** Most of the studies did not specify the exact number of artworks viewed. Of  
36 those studies that did specify a number, it ranged from one artwork to over 5300 in one exhibition.  
37 Half of the studies had participants view a collection of artworks as an exhibition or art programme.  
38 Only two studies showed each participant one artwork and both were in paediatric hospital  
39 rooms[8, 22]. The other experimental studies ranged from viewing four to 26 artworks in one sitting,  
40 with the exact numbers provided in Table 3.  
41

42 **Viewing directives.** Five studies explicitly mentioned the viewing directives given to participants.  
43 Two experimental studies told participants to attentively look at and explore each artwork[13, 24],  
44 whereas another study asked visitors to explore the art gallery in any way they pleased[16]. The  
45 remaining two studies asked participants to discuss and describe each artwork to the group and/or  
46 art director during art programmes[14, 15].  
47  
48

### 49 **Summary of Key Findings**

50  
51 All but one of the studies that measured self-reported stress found a significant decrease after  
52 viewing artwork[8, 16-18], with the final study showing no significant changes[7]. A consistent  
53 decrease in systolic blood pressure was also found across the four studies measuring blood  
54 pressure[8, 15, 22, 25]. Skin conductance and skin conductance variability both increased while  
55 viewing artworks[12, 13, 26]. The results for heart rate were mostly consistent. Two of the three  
56 studies that measured heart rate found that viewing artworks decreased heart rate[22, 26]. The  
57 other study found that viewing beautiful paintings increased heart rate for students trained in fine  
58 arts and decreased heart rate for other participants[13].  
59  
60

1  
2  
3 The cortisol and respiration results were less consistent. An art gallery visit decreased salivary  
4 cortisol levels[16]; however, a 6 week art intervention for people living with dementia increased  
5 waking cortisol levels[14]. Lastly, after a stressor, salivary cortisol decreased faster in those viewing  
6 scrambled images, compared to those viewing landscapes[23]. Viewing beautiful paintings lead to an  
7 increase in respiration rates in a healthy sample[13]. Whereas nature artworks in a hospital room  
8 decreased respiration rates in children[8]. These studies all had different samples, settings and  
9 artworks which may have accounted for these mixed findings. Lastly both alpha-amylase[23] and  
10 interleukin- 6[14] were each only measured in one study and showed no significant changes.  
11  
12

### 13 **Summary of Methodological Quality**

14  
15 Many of the studies lacked sufficient methodological details to conduct a full quality analysis and the  
16 quality problems have been briefly detailed below. None of the studies were pre-registered. Sample  
17 sizes ranged from 27 to 826 participants; however, only two studies conducted a power analysis to  
18 determine their sample size. Therefore, it is difficult to determine if all studies were adequately  
19 powered.  
20  
21

22 Only nine studies had comparator groups, with only seven related to the artwork intervention. For  
23 most studies, it was difficult to blind the participants, because in most cases participants were  
24 explicitly asked to view artworks. However, two studies did successfully blind the study as both the  
25 researchers/nurses collecting the measures and the participants were not explicitly made aware of  
26 the presence (or absence) of the artworks[17, 22]. All nine between-groups studies reported  
27 randomisation of participants to groups. However, the method of randomisation was not stated in  
28 many studies. Only four studies[7, 8, 12, 15] were randomised controlled trials, which are the gold-  
29 standard of research.  
30  
31

### 32 **Discussion**

33  
34 This scoping review aimed to examine the existing research on the effects of viewing visual artworks  
35 on stress outcomes and identify gaps in the research. The 14 included studies demonstrate research  
36 in this area is growing, with 10 studies being published in the last 10 years. However, there is still a  
37 paucity of studies, and the evidence that does exist has heterogeneous methodologies, creating  
38 difficulty in comparing results.  
39  
40

41 Overall, the evidence supports the claim that viewing artworks can reduce stress, in particular self-  
42 reported stress and systolic blood pressure. These preliminary quantitative results support  
43 qualitative research showing that viewing artworks provides positive distraction from a hospital  
44 environment and lowers self-reported stress[7, 10, 27]. However, mixed findings combined with a  
45 lack of homologous methodologies means that this claim cannot be concluded without more  
46 rigorous research. Future research needs to ensure better methodological quality including:  
47 adequate comparator groups, power analyses to ensure sufficient sample sizes, clearly defined  
48 randomisation procedures and pre-registration.  
49  
50

51 The differences between the studies suggest important moderating factors, one of which is setting.  
52 The museum context may add to the effects of viewing artwork, as museum related factors may lead  
53 to greater appreciation of artwork[28]. In addition, viewing artwork in a museum usually involves  
54 walking, which has its own stress-reducing effects[29]. Laboratory studies remove some of these  
55 contextual factors and may provide more specific evidence for the effects of viewing artworks, but  
56 they have lower ecological validity. The hospital room is an important setting as patients are often  
57 confined to their room for long time-periods and rooms are often deprived of environmental  
58 enrichment. Artwork could act as visual stimulation to positively distract patients from their stress,  
59  
60

1  
2  
3 pain and medical conditions. Artwork could also have stress-reducing benefits in other settings such  
4 as waiting rooms and workplaces, which are often related to high stress. More research in these  
5 settings should be conducted.  
6

7 Other possible moderating factors include individual characteristics, although little research has  
8 investigated these. Gender differences were found in two of the included studies, with a trend  
9 towards females experiencing greater stress-reduction in response to nature artworks[8, 17]. One  
10 small survey found that African Americans and Caucasians have similar preferences for nature  
11 artworks[30]; however, no study has investigated whether culture affects the stress-reducing effects  
12 of artworks. Given the diversity in cultures, demographics and individual preferences for artwork, it  
13 may be over simplistic to suggest that all individuals experience artwork the same way[31].  
14

15 The findings indicate that the content and aesthetic qualities of artwork are also important  
16 considerations. Although mixed, the studies generally indicated that nature, especially greenery,  
17 may be the most stress-reducing. This is consistent with research demonstrating that nature artwork  
18 is most preferred by adults[32] and children[8]. It is theorised that nature artwork has the greatest  
19 stress-reducing effects as evolutionarily humans are predisposed to experience restoration as a  
20 response to nature scenes[33]. On the other hand, abstract artworks can be seen as challenging,  
21 ambiguous and unclear for viewers, leading to increased stress[28, 34]. Other artwork content could  
22 be provocative and emotionally inappropriate for certain situations, eliciting anger and dislike. For  
23 example, a study by Ho and colleagues[31] found that certain provocative artworks elicited feelings  
24 of loneliness and hopelessness in viewers, suggesting artwork must be chosen carefully.  
25

26 The mixed findings suggest that under some conditions, viewing artwork may be physiologically  
27 relaxing, whereas under other conditions viewing artwork may be physiologically stimulating. The  
28 direction of these effects may not only depend upon the content of the artwork, but also the context  
29 and viewers' stress levels. Regardless of the direction of effects on physiology, lower self-reported  
30 stress may result.  
31

32 Although this review focussed on the stress-reducing effects of viewing artwork, it may also be  
33 important to investigate the stimulating aspects of artwork. For certain populations, such as people  
34 living with dementia, visual stimulation and enrichment through artworks could improve other  
35 aspects of health, such as cognitive function[14]. As discussed above, visual stimulation and  
36 enrichment may also be important to provide positive distraction from negative experiences. Three  
37 studies showed an increase in physiological stress[13, 14, 23]. This increased stimulation may be  
38 related to the content of the artworks ('beautiful' vs 'ugly' paintings[13], or landscapes vs scrambled  
39 images[23]) or the types of populations involved (people living with dementia[14] and art  
40 students[13]).  
41

42 Choice may be another important variable. This is especially pertinent in settings where people have  
43 little control. Art Carts have been used in hospitals to allow patients to choose which artworks to  
44 view during their stay to give them a sense of control over their environment[27]. Two studies in this  
45 review[7, 15] gave participants a choice of artwork, however research is yet to investigate whether  
46 the element of choice affects stress outcomes.  
47

48 Directives given to viewers may influence the way participants view artworks and therefore  
49 moderate the artworks' stress-reducing effects. Wikström[35] previously discussed the importance  
50 of creating an art-dialogue when viewing and discussing artworks in order to improve engagement,  
51 understanding and empowerment. Other research[31] demonstrated that the descriptions given to  
52 viewers about artwork could be influential, and therefore this may be an important element for  
53  
54  
55  
56  
57  
58  
59  
60

1  
2  
3 studies to include. However, few studies reported the directives given. It is important for future  
4 research to report what directives were provided and investigate whether this is influential.  
5

6 Finally, it is difficult to determine the dose-response relationship of artwork viewing. There was little  
7 consistency in the number of artworks shown to each participant, and no study investigated  
8 whether the quantity of artworks or viewing durations mattered. Therefore, future research could  
9 investigate the best artwork viewing duration and number of works.  
10

### 11 **Limitations**

12 This review is limited by only including English articles. Articles in other languages could have been  
13 missed. The review deviated slightly from the original protocol. Due to the large number of  
14 irrelevant articles identified using the original search strategy, the search terms were narrowed and  
15 the original title screening was only conducted by one reviewer. These deviations were required to  
16 make the search and screening more feasible. This review did not include anxiety or mood measures  
17 or studies using qualitative methodology. These were considered outside the scope of the review as  
18 they are not direct stress outcome measures.  
19  
20  
21

### 22 **Conclusions**

23 This scoping review summarised research on the effects of viewing visual artworks on stress  
24 outcomes. 14 studies met the eligibility criteria, with consistent reductions in self-reported stress,  
25 but mixed effects on physiology. Most of the research was low quality, with many methodological  
26 details missing, and there was high heterogeneity in research methodologies. Setting, individual  
27 characteristics, artwork content, and viewing instructions may be important moderating factors.  
28 More robust research, using standardised methods and randomised controlled trials, is needed  
29 before strong conclusions can be made about the effects of viewing visual art on stress outcomes.  
30  
31  
32  
33  
34  
35  
36  
37  
38  
39  
40  
41  
42  
43  
44  
45  
46  
47  
48  
49  
50  
51  
52  
53  
54  
55  
56  
57  
58  
59  
60



## References

1. Hathorn K, Nanda U. A guide to evidence-based art. *The Center for Health Design* 2008:1-22.
2. Boyce M, Bungay H, Munn-Giddings C, et al. The impact of the arts in healthcare on patients and service users: A critical review. *Health Soc Care Community* 2018;26(4):458-73.  
<https://doi.org/10.1111/hsc.12502>
3. Vetter D, Barth J, Uyulmaz S, et al. Effects of art on surgical patients: a systematic review and meta-analysis. *Ann Surg* 2015;262(5):704-13. <https://doi.org/10.1097/SLA.0000000000001480>
4. Davies CR, Rosenberg M, Knuiman M, et al. Defining arts engagement for population-based health research: Art forms, activities and level of engagement. *Arts Health* 2012;4(3):203-16.  
<https://doi.org/10.1080/17533015.2012.656201>
5. Carswell C, Reid J, Walsh I, et al. Arts-based interventions for hospitalised patients with cancer: A systematic literature review. *British Journal of Healthcare Management* 2018;24(12):611-6.  
<https://doi.org/10.12968/bjhc.2018.24.12.611>
6. Lankston L, Cusack P, Fremantle C, et al. Visual art in hospitals: Case studies and review of the evidence. *J R Soc Med* 2010;103(12):490-9. <https://doi.org/10.1258/jrsm.2010.100256>
7. McCabe C, Roche D, Hegarty F, et al. 'Open Window': A randomized trial of the effect of new media art using a virtual window on quality of life in patients' experiencing stem cell transplantation. *Psycho-Oncology* 2013;22(2):330-7. <https://doi.org/10.1002/pon.2093>
8. Eisen SL, Ulrich RS, Shepley MM, et al. The stress-reducing effects of art in pediatric health care: Art preferences of healthy children and hospitalized children. *Journal of Child Health Care* 2008;12(3):173-90. <https://doi.org/10.1177/1367493508092507>
9. Lacey S, Hagtvedt H, Patrick VM, et al. Art for reward's sake: Visual art recruits the ventral striatum. *Neuroimage* 2011;55(1):420-33. <https://doi.org/10.1016/j.neuroimage.2010.11.027>
10. George DR, de Boer C, Green MJ. "That landscape is where I'd like to be...": Offering patients with cancer a choice of artwork *JAMA*. 2017;317(9):890-2. doi:10.1001/jama.2017.1233
11. Peters MDJ, Godfrey CM, Mclnerney P, et al. Chapter 11: Scoping reviews (2020 version). In: Aromataris E, Munn Z, eds. *JBI Manual for Evidence Synthesis*, JBI 2020.  
<https://doi.org/10.46658/JBIMES-20-12>
12. Krauss L, Ott C, Opwis K, et al. Impact of contextualizing information on aesthetic experience and psychophysiological responses to art in a museum: A naturalistic randomized controlled trial. *Psychol Aesthet Creat Arts* 2019;Advanced Online Publication. <https://doi.org/10.1037/aca0000280>
13. de Jong MA. A physiological approach to aesthetic preference. I. Paintings. *Psychother Psychosom* 1972;20(6):360-5. <https://doi.org/10.1159/000286439>
14. D'Cunha NM, McKune AJ, Isbel S, et al. Psychophysiological responses in people living with dementia after an art gallery intervention: An exploratory study. *J Alzheimer's Dis* 2019;72(2):549-62. doi:10.3233/JAD-190784
15. Wikström B, Theorell T, Sandström S. Medical health and emotional effects of art stimulation in old age. *Psychother Psychosom* 1993;60(3-4):195-206. <https://doi.org/10.1159/000288693>

16. Clow A, Fredhoi C. Normalisation of salivary cortisol levels and self-report stress by a brief lunchtime visit to an art gallery by London City workers. *Journal of Holistic Healthcare* 2006;3(2):29-32.
17. Kweon B, Ulrich R, Walker V, et al. Anger and stress: The role of landscape posters in an office setting. *Environ Behav* 2008;40(3):355-81. <https://doi.org/10.1177/0013916506298797>
18. Karnik M, Printz B, Finkel J. A hospital's contemporary art collection: effects on patient mood, stress, comfort, and expectations. *HERD* 2014;7(3):60-77. <https://doi.org/10.1177/193758671400700305>
19. Mackay C, Cox T, Burrows G, et al. An inventory for the measurement of self-reported stress and arousal. *Br J Soc Clin Psychol* 1978;17(3):283-4. <https://doi.org/10.1111/j.2044-8260.1978.tb00280.x>
20. King MG, Burrows GD, Stanley GV. Measurement of stress and arousal: Validation of the stress/arousal adjective checklist. *Br J Psychol* 1983;74(4):473-9. <https://doi.org/10.1111/j.2044-8295.1983.tb01880.x>
21. Roth AJ, Kornblith AB, Batel-Copel L, et al. Rapid screening for psychologic distress in men with prostate carcinoma: A pilot study. *Cancer* 1998;82(10):1904-8. doi:10.1002/(sici)1097-0142(19980515)82:10<1904::aid-cnrc13>3.0.co;2-x
22. Pearson M, Gaines K, Pati D, et al. The physiological impact of window murals on pediatric patients. *HERD* 2019;12(2):116-29. <https://doi.org/10.1177/1937586718800483>
23. Law M, Minissale G, Lambert A, et al. Viewing landscapes is more stimulating than scrambled images after a stressor: A cross-disciplinary approach. *Front Psychol* 2020;10:3092. <https://doi.org/10.3389/fpsyg.2019.03092>
24. Siri F, Ferroni F, Ardizzi M, et al. Behavioral and autonomic responses to real and digital reproductions of works of art. *Prog Brain Res* 2018;237:201-21. <https://doi.org/10.1016/bs.pbr.2018.03.020>
25. Mastandrea S, Maricchiolo F, Carrus G, et al. Visits to figurative art museums may lower blood pressure and stress. *Arts Health* 2019;11(2):1-10. <https://doi.org/10.1080/17533015.2018.1443953>
26. Tschacher W, Greenwood S, Kirchberg V, et al. Physiological correlates of aesthetic perception of artworks in a museum. *Psychol Aesthet, Creat Arts* 2012;6(1):96. <https://doi.org/10.1037/a0023845>
27. Suter E, Baylin D. Choosing art as a complement to healing. *Appl Nurs Res* 2007;20(1):32-8. <https://doi.org/10.1016/j.apnr.2005.11.004>
28. Mastandrea S. Visitor's approaches, personality traits and psycho-physiological well-being in different art style museums. *International and Interdisciplinary Conference on Digital Environments for Education, Arts and Heritage*; Springer; 2018.
29. Kelly P, Williamson C, Niven AG, et al. Walking on sunshine: Scoping review of the evidence for walking and mental health. *Br J Sports Med* 2018;52(12):800-6. <http://dx.doi.org/10.1136/bjsports-2017-098827>
30. Hathorn K, Ulrich R. The therapeutic art program of Northwestern Memorial Hospital. *Creating Environments that Heal: Proceedings of the Symposium On Healthcare Design*; 2001.



- 1  
2  
3 31. Ho RT, Potash JS, Fang F, et al. Art viewing directives in hospital settings effect on mood. *HERD*  
4 2015;8(3):30-43. <https://doi.org/10.1177/1937586715575903>  
5  
6 32. Nanda U, Eisen SL, Baladandayuthapani V. Undertaking an art survey to compare patient versus  
7 student art preferences. *Environ Behav* 2008;40(2):269-301.  
8 <https://doi.org/10.1177/0013916507311552>  
9  
10 33. Ulrich R, Simons R, Miles M. Effects of environmental simulations and television on blood donor  
11 stress. *J Archit Plann Res* 2003;20(1):38-47. <https://www.jstor.org/stable/43030641>  
12  
13 34. Ulrich R. How design impacts wellness. *Healthc Forum J* 1992;35(5):20-5.  
14  
15 35. Wikström B. The dynamics of visual art dialogues: Experiences to be used in hospital settings  
16 with visual art enrichment. *Nurs Res Practi* 2011;2011:204594. doi:10.1155/2011/204594  
17  
18  
19  
20  
21  
22  
23

24 **Authors' contributions:** ML and EB conceptualised the project and designed the scoping review  
25 protocol. ML performed the search strategy. ML and NK performed the study screening and data  
26 extraction. ML wrote the manuscript. EB and NK edited the manuscript. All authors approved the  
27 final manuscript.  
28

29 **Funding statement:** This research received no specific grant from any funding agency in the public,  
30 commercial or not-for-profit sectors.  
31

32 **Competing interests:** None  
33  
34  
35  
36  
37  
38  
39  
40  
41  
42  
43  
44  
45  
46  
47  
48  
49  
50  
51  
52  
53  
54  
55  
56  
57  
58  
59  
60

1  
2  
3 **Figure 1.** PRISMA-ScR flow diagram of the study selection process  
4  
5  
6  
7  
8  
9  
10  
11  
12  
13  
14  
15  
16  
17  
18  
19  
20  
21  
22  
23  
24  
25  
26  
27  
28  
29  
30  
31  
32  
33  
34  
35  
36  
37  
38  
39  
40  
41  
42  
43  
44  
45  
46  
47  
48  
49  
50  
51  
52  
53  
54  
55  
56  
57  
58  
59  
60

For peer review only

Table 1

*Example search strategy syntax for databases*

| Database                          | Search Strategy Syntax                                                                                                                                                                                                                                                                                                                                                                                                                                                                           |
|-----------------------------------|--------------------------------------------------------------------------------------------------------------------------------------------------------------------------------------------------------------------------------------------------------------------------------------------------------------------------------------------------------------------------------------------------------------------------------------------------------------------------------------------------|
| Scopus                            | ( TITLE-ABS-KEY ( artwork OR "art work" OR "visual art" OR "art museum" OR painting OR mural OR "works of art" OR "viewing art" OR "viewing artwork" OR "artwork viewing" OR "art gallery" OR "art galleries" ) AND TITLE-ABS-KEY ( stress OR "blood pressure" OR anxiety OR "heart rate" OR mood OR norepinephrine OR epinephrine OR "stress hormones" OR stressor OR glucocorticoids OR cortisol OR alpha-amylase OR "stress reduction" ) ) AND ( LIMIT TO ( LANGUAGE , "English" ) )          |
| ProQuest Dissertations and Thesis | ab(artwork OR "art work" OR "visual art" OR "art museum" OR painting OR mural OR "works of art" OR museum OR "viewing art" OR "artistic work" OR "viewing artwork" OR "artwork viewing" OR "art gallery" OR "art galleries") AND ab(stress OR "blood pressure" OR anxiety OR respiration OR "heart rate" OR mood OR norepinephrine OR epinephrine OR "stress hormones" OR "mental health" OR stressor OR glucocorticoids OR cortisol OR alpha-amylase OR "immune marker" OR "stress reduction" ) |

Table 2

*Summaries of the studies' designs and key stress outcome findings*

| Study                     | Study Design and Key Findings                                                                                                                                                                                                                                                                                                                                                                                                                                                                                                                                                                                                                                                                                                                                                             |
|---------------------------|-------------------------------------------------------------------------------------------------------------------------------------------------------------------------------------------------------------------------------------------------------------------------------------------------------------------------------------------------------------------------------------------------------------------------------------------------------------------------------------------------------------------------------------------------------------------------------------------------------------------------------------------------------------------------------------------------------------------------------------------------------------------------------------------|
| Clow & Fredhoi (2006)[16] | Studied self-reported stress and arousal, and salivary cortisol levels in a group of London city workers during a lunchtime visit to an art gallery. Measurements were taken before and after the 35-40-minute gallery visit to explore pre-post intervention changes. Self-reported stress and salivary cortisol levels both decreased over the intervention. There were no differences in arousal levels.                                                                                                                                                                                                                                                                                                                                                                               |
| D'Cunha et al (2019)[14]  | Evaluated the psychophysiological effects of attending the National Art Gallery of Australia Art and Dementia programme. People living with dementia attended the group-based, six-week programme which involved viewing and discussing artworks, led by an art director. Measures of salivary cortisol and interleukin-6 were taken at baseline, at the end of the programme and 12 weeks later. Waking salivary cortisol levels increased from baseline to post-intervention, but decreased at follow-up. No changes in evening cortisol or interleukin-6 were observed. The ratio of waking to evening cortisol increased from baseline to post-intervention indicating a more dynamic diurnal cortisol rhythm.                                                                        |
| de Jong (1972)[13]        | Three groups of participants (advanced art history students, advanced fine art students and laboratory workers as controls) viewed projections of 12 paintings considered to be 'beautiful' and 12 paintings considered to be 'ugly' in a random order while their heart rate, respiration rate and skin conductance was measured continuously. The fine arts and art history students showed a greater change in skin conductance than the laboratory workers. Respiration and skin conductance were higher during the 'beautiful' paintings than the 'ugly' paintings in all groups. The fine arts students had faster heart rate during the 'beautiful' paintings compared to the 'ugly' paintings, however, for the other two groups, this result was reversed.                       |
| Eisen et al (2008)[8]     | The third phase this study investigated which type of art was most effective in reducing stress in paediatric patients. On arrival to the hospital, patients were randomly allocated to one of three rooms; a room with a nature artwork, a room with an abstract artwork or a room with no artwork. Self-reported stress, blood pressure and respiratory rate were taken at baseline and after two hours of exposure to the artworks. Overall, there were no significant differences between the groups on stress, blood pressure or respiration. However, sub-analyses showed that significantly more males than females in the 8-10 age group were positively affected by the nature artwork, as demonstrated by decreased self-reported stress, blood pressure and respiratory rates. |
| Karnik et al (2014)[18]   | Installed a diverse collection of artworks in the public spaces and clinic rooms of a hospital. Patients were retrospectively contacted with a survey which included evaluating whether the art installations changed their self-reported stress levels. 61% of the patients that reported seeing the artworks stated that the artworks somewhat or significantly reduced their stress levels.                                                                                                                                                                                                                                                                                                                                                                                            |
| Krauss et al (2019)[12]   | Participants viewed six Flemish expressionism artworks in an art museum, while heart rate and skin conductance were continuously measured. Participants were randomly assigned to either receive descriptive information about the artworks (described the artwork in a declarative way) or elaborative information about the artworks (described the context and deeper meaning behind the artworks). There were no significant differences in heart rate, heart rate variability or skin conductance between the two groups. However, in both groups heart rate was lower, and skin conductance and heart rate variability higher when viewing the artworks, compared to baseline.                                                                                                      |

1  
2  
3  
4  
5  
6  
7  
8  
9  
10  
11  
12  
13  
14  
15  
16  
17  
18  
19  
20  
21  
22  
23  
24  
25  
26  
27  
28  
29  
30  
31  
32  
33  
34  
35  
36  
37  
38  
39  
40  
41  
42  
43  
44  
45  
46  
47  
48  
49  
50  
51  
52  
53  
54  
55  
56  
57  
58  
59  
60

- Kweon et al (2008)[17] Conducted an experiment investigating the effects of artwork posters on stress and anger levels in an office setting. Students were asked to complete a series of stress and anger provoking computer tasks in one of four different mock office conditions; an office with nature posters, abstract posters, both nature and abstract posters or no posters. Levels of self-reported stress were measured across the experiment. Males had the highest stress levels in the office with no posters, and the lowest stress levels in the office with mixed art posters. On the other hand, females had the highest stress in the office with all abstract posters and the lowest levels in the office with all nature posters. However, these results were only significant for males and not females.
- Law et al (2020)[23] Conducted a pilot study to investigate whether nature artworks could improve recovery from a laboratory stressor. Participants were randomised to either view a 30-minute digital slideshow of landscape artworks or digitally scrambled versions of these artworks after being exposed to a laboratory stressor. Saliva samples were taken at baseline, after the stressor, during the art viewing and after the art viewing to measure cortisol and alpha-amylase. Salivary cortisol levels decreased more rapidly while viewing the scrambled images compared to the landscape artworks. There were no changes in alpha-amylase across the experiment or between groups.
- Mastandrea et al (2019)[25] Students visited an art museum and were randomly assigned to visit one of three art exhibitions for five minutes; a figurative art exhibition, a modern art exhibition or a museum office as a control condition. Blood pressure and heart rate were measured before and after the visit. Systolic blood pressure decreased in all groups; however, this decrease was only significant in the figurative art group. Heart rate also decreased in all three groups, however, there was no significant differences between groups.
- McCabe et al (2013)[7] Evaluated the effects of the Open Window art intervention on stem-cell transplantation patients. The Open Window is a virtual window which is installed in a hospital room, where the patients can switch through nine art channels with different artworks. Patients were randomised to either a room with the Open Window or not. Self-reported distress was measured at admission, the day before transplant, seven days after transplant, prior to discharge, and 60 days, 100 days and six months post-transplant. Results demonstrated no significant differences in levels of distress between the two groups at any of the time-points.
- Pearson et al (2019)[22] Examined the impact of nature-themed window murals on physiological measures in paediatric patients. Paediatric patients were assigned to hospital rooms with either a fish-themed window mural, a tree-themed window mural or no window mural. Patients' blood pressure and heart rate were taken retrospectively from the patients' medical records. Those patients with the window murals had significant improvements in heart rate and systolic blood pressure, with the tree-themed mural having the greatest effect.
- Siri et al (2018)[24] Examined the effects of viewing original physical artworks and their digital reproductions within a museum context. Cardiovascular variables were measured via ECG continuously in healthy volunteers while viewing two real abstract paintings and their digital reproductions. Results showed that there was a significant difference in heart rate between viewing the two real paintings, but no difference was found between the digital reproductions, or between the real and digital reproductions. No differences in heart rate variability were found.
- Tschacher et al (2012)[26] Monitored the physiology of visitors to an art museum using an electronic sensor glove which recorded physiological data and locomotion activity while they viewed the artworks. Afterwards, they were asked to rate the aesthetic qualities of some of the artworks. Heart rate variability increased while viewing artworks that were deemed beautiful, high quality and surprising/humorous.

1  
2  
3 Skin conductance variability increased, and heart rate decreased while viewing  
4 more dominant artworks (artworks experienced as dominant and stimulating by  
5 the viewers).  
6

7 Wikström et al  
8 (1993)[15]

9 Investigated whether visual stimulation could improve the health of elderly  
10 women living alone. The women were randomised to either an intervention or  
11 control group. The intervention group were shown a selection of pictures,  
12 including artworks, and asked to discuss them, whereas the control group  
13 discussed current events. Blood pressure was measured at baseline, immediately  
14 after the intervention and four months later. The intervention group had  
15 significantly lower systolic blood pressure than the control group after the  
16 intervention and at follow-up

---

17  
18  
19  
20  
21  
22  
23  
24  
25  
26  
27  
28  
29  
30  
31  
32  
33  
34  
35  
36  
37  
38  
39  
40  
41  
42  
43  
44  
45  
46  
47  
48  
49  
50  
51  
52  
53  
54  
55  
56  
57  
58  
59  
60

For peer review only

1  
2  
3  
4  
5  
6  
7  
8  
9  
10  
11  
12  
13  
14  
15  
16  
17  
18  
19  
20  
21  
22  
23  
24  
25  
26  
27  
28  
29  
30  
31  
32  
33  
34  
35  
36  
37  
38  
39  
40  
41  
42  
43  
44  
45  
46

Table 3

Overview of studies included in the review

| Study                     | Study Design                                               | Comparator Group                                  | Setting                                  | Population (N)                                                                          | Stress Outcome Measures                                                  | Type and Content of Artwork                                                                                                                                        | Quantity of Artworks Viewed by Each Participant | Duration of Artwork Viewing                                     |
|---------------------------|------------------------------------------------------------|---------------------------------------------------|------------------------------------------|-----------------------------------------------------------------------------------------|--------------------------------------------------------------------------|--------------------------------------------------------------------------------------------------------------------------------------------------------------------|-------------------------------------------------|-----------------------------------------------------------------|
| Clow & Fredhoi (2006)[16] | Pre- and post-test, within groups quasi-experimental study | None                                              | Art gallery                              | Office workers N=28 (25 included in the analysis)                                       | Self-reported stress<br>Self-reported arousal<br>Salivary cortisol       | Physical artworks in a gallery- exact content not specified                                                                                                        | Not specified- gallery exhibition               | 35-40 minutes in the gallery                                    |
| D’Cunha et al (2019)[14]  | Pre- and post-test, within groups quasi-experimental study | None                                              | Art gallery                              | People living with dementia N=28 (22 included in the analysis)                          | Salivary cortisol<br>interleukin-6                                       | Physical artworks in a gallery- exact content not specified                                                                                                        | 3-4 artworks each session, over 5-6 sessions    | 5-6x 90-minute sessions. Each artwork was viewed for 20 minutes |
| de Jong (1972)[13]        | Between groups experimental study                          | Laboratory workers (non-art students)             | Laboratory                               | Advanced art history students, advanced fine arts students and laboratory workers N= 27 | Heart rate<br>Skin conductance<br>Respiration rate                       | Digital projections of 12 paintings considered ‘beautiful’ and 12 paintings considered ‘ugly’                                                                      | 24                                              | Each painting was viewed for 10 seconds                         |
| Eisen et al (2008)[8]     | Pre- and post-test, randomised controlled trial            | Room with no artwork                              | Hospital-patients’ room                  | Paediatric patients (aged 5-17) N=78                                                    | Self-reported stress<br>Heart rate<br>Blood pressure<br>Respiratory rate | One group had a representational nature artwork hung on the wall, whereas the other group had an abstract artwork hung on the wall                                 | 1                                               | 2 hours                                                         |
| Karnik et al (2014)[18]   | Cross-sectional survey                                     | None                                              | Hospital- public spaces and clinic rooms | Hospital patients N= 826                                                                | Self-reported change in stress                                           | Physical collection of abstract and representational imagery (including nature imagery). Includes an assortment of artistic media; and a variety of subject matter | Collection of over 5300 artworks                | N/A                                                             |
| Krauss et al (2019)[12]   | Randomised controlled trial                                | Group received only descriptive information about | Art museum                               | General public aged between 18 and 35 N= 75                                             | Heart rate<br>Heart rate variability                                     | Physical abstract paintings of Flemish expressionism                                                                                                               | 6                                               | Not specified                                                   |

|    |                                |                                                                      | the artwork<br>(compared to<br>elaborative<br>information) |                                              |                                                                                      |                                                             |                                                                                                                                                                                              |                                                                              |                                                                                                         |
|----|--------------------------------|----------------------------------------------------------------------|------------------------------------------------------------|----------------------------------------------|--------------------------------------------------------------------------------------|-------------------------------------------------------------|----------------------------------------------------------------------------------------------------------------------------------------------------------------------------------------------|------------------------------------------------------------------------------|---------------------------------------------------------------------------------------------------------|
|    |                                |                                                                      |                                                            |                                              |                                                                                      | Skin conductance                                            |                                                                                                                                                                                              |                                                                              |                                                                                                         |
| 7  | Kweon et al<br>(2008)[17]      | Between groups<br>experimental study                                 | No artwork<br>posters group                                | Laboratory<br>(replicated<br>office setting) | Psychology students<br>N=210                                                         | Self-reported<br>stress                                     | Nature posters and<br>abstract posters                                                                                                                                                       | 4                                                                            | Not specified                                                                                           |
| 10 | Law et al<br>(2020)[23]        | Between groups<br>experimental pilot<br>study                        | Scrambled artwork<br>images                                | Laboratory                                   | General public<br>N=30                                                               | Salivary cortisol<br>Salivary alpha-<br>amylase             | Digital slideshow of<br>either landscape<br>paintings or digitally<br>scrambled versions of<br>these paintings                                                                               | 26                                                                           | 30 minutes                                                                                              |
| 15 | Mastandrea et al<br>(2019)[25] | Between groups<br>experimental study                                 | Museum office                                              | Art museum                                   | Undergraduate<br>students<br>N=77                                                    | Blood pressure<br>Heart rate                                | Physical artworks in a<br>gallery- including<br>figurative artworks (e.g.<br>landscapes and<br>portraits) and modern<br>artworks (e.g. abstract,<br>impressionist and<br>informal paintings) | Not specified-<br>gallery exhibition                                         | 5 minutes                                                                                               |
| 22 | McCabe et al<br>(2013)[7]      | Randomised<br>prospective clinical<br>trial                          | Room without the<br>'Open Window'                          | Hospital-<br>patients' room                  | Stem cell<br>transplantation<br>patients<br>N= 199 (164 included<br>in the analysis) | Self-reported<br>distress                                   | Virtual window, with<br>artwork projections.<br>Artwork collections<br>ranged from visually<br>complex abstract images<br>to images of nature.                                               | Not specified- 9 art<br>'channels,' each<br>with a collection of<br>artworks | For the duration of their<br>hospital stay- times not<br>specified                                      |
| 29 | Pearson et al<br>(2019)[22]    | Pre- and post-test,<br>between groups<br>quasi-experimental<br>study | Room without a<br>window mural                             | Hospital-<br>patients' room                  | Paediatric patients<br>aged 2-18)<br>N=90                                            | Heart rate<br>Systolic blood<br>pressure                    | Window mural- either<br>aquatic or forest themed                                                                                                                                             | 1                                                                            | Minimum of 48 hours                                                                                     |
| 32 | Siri et al<br>(2018)[24]       | Within groups<br>experimental study                                  | None                                                       | Art museum                                   | General public<br>N=60                                                               | Heart rate<br>Heart rate<br>variability                     | 2 real abstract<br>contemporary paintings<br>and their digitally<br>produced replicates                                                                                                      | 4                                                                            | 144 seconds per artwork                                                                                 |
| 36 | Tschacher et al<br>(2012)[26]  | Within groups quasi-<br>experimental study                           | None                                                       | Art museum                                   | Museum visitors<br>N=517 (373 included<br>in the analysis)                           | Skin conductance<br>Heart rate<br>Heart rate<br>variability | Physical modern and<br>contemporary art<br>exhibition                                                                                                                                        | 76                                                                           | No specific timeframe<br>given to participants. On<br>average, they spent 28<br>minutes at the gallery. |



1  
2  
3  
4  
5  
6  
7  
8  
9  
10  
11  
12  
13  
14  
15  
16  
17  
18  
19  
20  
21  
22  
23  
24  
25  
26  
27  
28  
29  
30  
31  
32  
33  
34  
35  
36  
37  
38  
39  
40  
41  
42  
43  
44  
45  
46

|                           |                                                |                                    |                          |                         |                         |                                                                                                                                                |                                                |               |
|---------------------------|------------------------------------------------|------------------------------------|--------------------------|-------------------------|-------------------------|------------------------------------------------------------------------------------------------------------------------------------------------|------------------------------------------------|---------------|
| Wikström et al (1993)[15] | Pre- and post-test randomised controlled trial | Group that were not shown artworks | Senior citizen apartment | Women aged over 70 N=40 | Systolic blood pressure | Physical pictures- ranging from artworks of nature, flowers and people, abstract patterns, white figures on black backgrounds and photographs. | Not specified how many each participant viewed | Not specified |
|---------------------------|------------------------------------------------|------------------------------------|--------------------------|-------------------------|-------------------------|------------------------------------------------------------------------------------------------------------------------------------------------|------------------------------------------------|---------------|

For peer review only

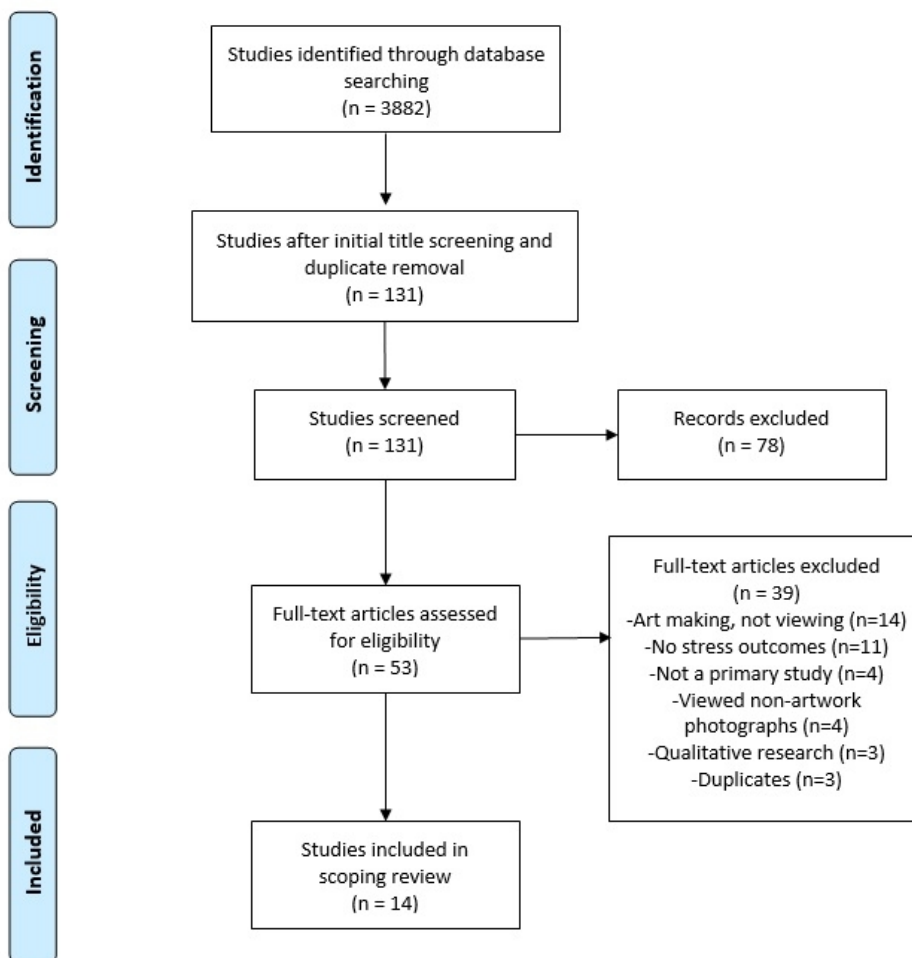

Figure 1. PRISMA-ScR flow diagram of the study selection process

177x184mm (96 x 96 DPI)

## Preferred Reporting Items for Systematic reviews and Meta-Analyses extension for Scoping Reviews (PRISMA-ScR) Checklist

| SECTION                                               | ITEM | PRISMA-ScR CHECKLIST ITEM                                                                                                                                                                                                                                                                                  | REPORTED ON PAGE # |
|-------------------------------------------------------|------|------------------------------------------------------------------------------------------------------------------------------------------------------------------------------------------------------------------------------------------------------------------------------------------------------------|--------------------|
| <b>TITLE</b>                                          |      |                                                                                                                                                                                                                                                                                                            |                    |
| Title                                                 | 1    | Identify the report as a scoping review.                                                                                                                                                                                                                                                                   |                    |
| <b>ABSTRACT</b>                                       |      |                                                                                                                                                                                                                                                                                                            |                    |
| Structured summary                                    | 2    | Provide a structured summary that includes (as applicable): background, objectives, eligibility criteria, sources of evidence, charting methods, results, and conclusions that relate to the review questions and objectives.                                                                              |                    |
| <b>INTRODUCTION</b>                                   |      |                                                                                                                                                                                                                                                                                                            |                    |
| Rationale                                             | 3    | Describe the rationale for the review in the context of what is already known. Explain why the review questions/objectives lend themselves to a scoping review approach.                                                                                                                                   |                    |
| Objectives                                            | 4    | Provide an explicit statement of the questions and objectives being addressed with reference to their key elements (e.g., population or participants, concepts, and context) or other relevant key elements used to conceptualize the review questions and/or objectives.                                  |                    |
| <b>METHODS</b>                                        |      |                                                                                                                                                                                                                                                                                                            |                    |
| Protocol and registration                             | 5    | Indicate whether a review protocol exists; state if and where it can be accessed (e.g., a Web address); and if available, provide registration information, including the registration number.                                                                                                             |                    |
| Eligibility criteria                                  | 6    | Specify characteristics of the sources of evidence used as eligibility criteria (e.g., years considered, language, and publication status), and provide a rationale.                                                                                                                                       |                    |
| Information sources*                                  | 7    | Describe all information sources in the search (e.g., databases with dates of coverage and contact with authors to identify additional sources), as well as the date the most recent search was executed.                                                                                                  |                    |
| Search                                                | 8    | Present the full electronic search strategy for at least 1 database, including any limits used, such that it could be repeated.                                                                                                                                                                            |                    |
| Selection of sources of evidence†                     | 9    | State the process for selecting sources of evidence (i.e., screening and eligibility) included in the scoping review.                                                                                                                                                                                      |                    |
| Data charting process‡                                | 10   | Describe the methods of charting data from the included sources of evidence (e.g., calibrated forms or forms that have been tested by the team before their use, and whether data charting was done independently or in duplicate) and any processes for obtaining and confirming data from investigators. |                    |
| Data items                                            | 11   | List and define all variables for which data were sought and any assumptions and simplifications made.                                                                                                                                                                                                     |                    |
| Critical appraisal of individual sources of evidence§ | 12   | If done, provide a rationale for conducting a critical appraisal of included sources of evidence; describe the methods used and how this information was used in any data synthesis (if appropriate).                                                                                                      |                    |
| Synthesis of results                                  | 13   | Describe the methods of handling and summarizing the data that were charted.                                                                                                                                                                                                                               |                    |

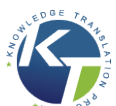

| SECTION                                       | ITEM | PRISMA-ScR CHECKLIST ITEM                                                                                                                                                                       | REPORTED ON PAGE # |
|-----------------------------------------------|------|-------------------------------------------------------------------------------------------------------------------------------------------------------------------------------------------------|--------------------|
| <b>RESULTS</b>                                |      |                                                                                                                                                                                                 |                    |
| Selection of sources of evidence              | 14   | Give numbers of sources of evidence screened, assessed for eligibility, and included in the review, with reasons for exclusions at each stage, ideally using a flow diagram.                    |                    |
| Characteristics of sources of evidence        | 15   | For each source of evidence, present characteristics for which data were charted and provide the citations.                                                                                     |                    |
| Critical appraisal within sources of evidence | 16   | If done, present data on critical appraisal of included sources of evidence (see item 12).                                                                                                      |                    |
| Results of individual sources of evidence     | 17   | For each included source of evidence, present the relevant data that were charted that relate to the review questions and objectives.                                                           |                    |
| Synthesis of results                          | 18   | Summarize and/or present the charting results as they relate to the review questions and objectives.                                                                                            |                    |
| <b>DISCUSSION</b>                             |      |                                                                                                                                                                                                 |                    |
| Summary of evidence                           | 19   | Summarize the main results (including an overview of concepts, themes, and types of evidence available), link to the review questions and objectives, and consider the relevance to key groups. |                    |
| Limitations                                   | 20   | Discuss the limitations of the scoping review process.                                                                                                                                          |                    |
| Conclusions                                   | 21   | Provide a general interpretation of the results with respect to the review questions and objectives, as well as potential implications and/or next steps.                                       |                    |
| <b>FUNDING</b>                                |      |                                                                                                                                                                                                 |                    |
| Funding                                       | 22   | Describe sources of funding for the included sources of evidence, as well as sources of funding for the scoping review. Describe the role of the funders of the scoping review.                 |                    |

JB1 = Joanna Briggs Institute; PRISMA-ScR = Preferred Reporting Items for Systematic reviews and Meta-Analyses extension for Scoping Reviews.

\* Where *sources of evidence* (see second footnote) are compiled from, such as bibliographic databases, social media platforms, and Web sites.

† A more inclusive/heterogeneous term used to account for the different types of evidence or data sources (e.g., quantitative and/or qualitative research, expert opinion, and policy documents) that may be eligible in a scoping review as opposed to only studies. This is not to be confused with *information sources* (see first footnote).

‡ The frameworks by Arksey and O'Malley (6) and Levac and colleagues (7) and the JBI guidance (4, 5) refer to the process of data extraction in a scoping review as data charting.

§ The process of systematically examining research evidence to assess its validity, results, and relevance before using it to inform a decision. This term is used for items 12 and 19 instead of "risk of bias" (which is more applicable to systematic reviews of interventions) to include and acknowledge the various sources of evidence that may be used in a scoping review (e.g., quantitative and/or qualitative research, expert opinion, and policy document).

From: Tricco AC, Lillie E, Zarin W, O'Brien KK, Colquhoun H, Levac D, et al. PRISMA Extension for Scoping Reviews (PRISMA-ScR): Checklist and Explanation. *Ann Intern Med.* ;169:467–473. doi: 10.7326/M18-0850

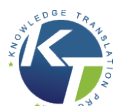

St. Michael's

Inspired Care.  
Inspiring Science.

For peer review only - <http://bmjopen.bmj.com/site/about/guidelines.xhtml>

# BMJ Open

## Evidence for the effects of Viewing Visual Artworks on Stress Outcomes: A Scoping Review

|                                 |                                                                                                                                                                                       |
|---------------------------------|---------------------------------------------------------------------------------------------------------------------------------------------------------------------------------------|
| Journal:                        | <i>BMJ Open</i>                                                                                                                                                                       |
| Manuscript ID                   | bmjopen-2020-043549.R1                                                                                                                                                                |
| Article Type:                   | Original research                                                                                                                                                                     |
| Date Submitted by the Author:   | 04-Feb-2021                                                                                                                                                                           |
| Complete List of Authors:       | Law, Mikaela; The University of Auckland, Psychological Medicine<br>Karulkar, Nikita; The University of Auckland, Psychological Medicine<br>Broadbent, E; The University of Auckland, |
| <b>Primary Subject Heading</b>: | Complementary medicine                                                                                                                                                                |
| Secondary Subject Heading:      | Medical management, Mental health, Research methods                                                                                                                                   |
| Keywords:                       | COMPLEMENTARY MEDICINE, MENTAL HEALTH, PSYCHIATRY, SOCIAL MEDICINE                                                                                                                    |
|                                 |                                                                                                                                                                                       |

SCHOLARONE™  
Manuscripts

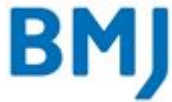

I, the Submitting Author has the right to grant and does grant on behalf of all authors of the Work (as defined in the below author licence), an exclusive licence and/or a non-exclusive licence for contributions from authors who are: i) UK Crown employees; ii) where BMJ has agreed a CC-BY licence shall apply, and/or iii) in accordance with the terms applicable for US Federal Government officers or employees acting as part of their official duties; on a worldwide, perpetual, irrevocable, royalty-free basis to BMJ Publishing Group Ltd ("BMJ") its licensees and where the relevant Journal is co-owned by BMJ to the co-owners of the Journal, to publish the Work in this journal and any other BMJ products and to exploit all rights, as set out in our [licence](#).

The Submitting Author accepts and understands that any supply made under these terms is made by BMJ to the Submitting Author unless you are acting as an employee on behalf of your employer or a postgraduate student of an affiliated institution which is paying any applicable article publishing charge ("APC") for Open Access articles. Where the Submitting Author wishes to make the Work available on an Open Access basis (and intends to pay the relevant APC), the terms of reuse of such Open Access shall be governed by a Creative Commons licence – details of these licences and which [Creative Commons](#) licence will apply to this Work are set out in our licence referred to above.

Other than as permitted in any relevant BMJ Author's Self Archiving Policies, I confirm this Work has not been accepted for publication elsewhere, is not being considered for publication elsewhere and does not duplicate material already published. I confirm all authors consent to publication of this Work and authorise the granting of this licence.

1  
2  
3 **Evidence for the effects of Viewing Visual Artworks on Stress Outcomes: A Scoping Review**  
4  
5  
6  
7

8  
9 Mikaela Law (MHLthPsysc), Nikita Karulkar (BSc) & Elizabeth Broadbent (PhD)  
10  
11  
12

13  
14  
15 All authors are affiliated with the Department of Psychological Medicine, The University of  
16 Auckland, Private Bag 92019, Auckland 1142, New Zealand  
17  
18  
19  
20  
21  
22  
23  
24

25 **Corresponding author:**

26 Elizabeth Broadbent

27 [e.broadbent@auckland.ac.nz](mailto:e.broadbent@auckland.ac.nz)

28 The University of Auckland

29 Building 507,

30 28 Park Avenue, Grafton, 1023

31 Auckland, New Zealand

32 [+64 9 923 6756](tel:+6499236756)  
33  
34  
35  
36  
37  
38  
39  
40  
41  
42  
43  
44

45 **Word Count: 3997**  
46  
47  
48  
49  
50  
51  
52  
53  
54  
55  
56  
57  
58  
59  
60

## **Abstract**

**Objective:** To review the existing evidence on the effects of viewing visual artworks on stress outcomes and outline any gaps in the research.

**Design:** A scoping review was conducted based on the Joanna Briggs Institute methodology for scoping reviews and using the preferred reporting items for systematic reviews and meta-analyses extension for scoping reviews. Two independent reviewers performed the screening and data extraction.

**Data Sources:** Medline, Embase, APA PsycINFO, Cochrane CENTRAL, Scopus, Google Scholar, Google, ProQuest Theses and Dissertations Database, APA PsycExtra and Opengrey.eu were searched in May 2020.

**Eligibility Criteria:** Studies were included if they investigated the effects of viewing at least one visual artwork on at least one stress outcome measure. Studies involving active engagement with art, review papers or qualitative studies were excluded. There were no limits in terms of year of publication, contexts or population types; however, only studies published in the English language were considered.

**Data Extraction and Synthesis:** Information extracted from manuscripts included: study methodologies, population and setting characteristics, details of the artwork interventions, key findings and details related to methodological quality.

**Results:** 14 primary studies were identified, with heterogeneous study designs, methodologies and artwork interventions. The results of these studies demonstrated consistent reductions in self-reported stress after viewing artworks, but mixed effects on physiological stress measures. The methodological quality of the studies was poor, with many important methodological details missing.

**Conclusions:** There is promising evidence for effects of viewing artwork on reducing stress. Moderating factors may include setting, individual characteristics, artwork content, and viewing instructions. More robust research, using more standardised methods and randomised controlled trials, are needed before full conclusions can be made.

**Registration Details:** A protocol for this review is registered with the Open Science Framework ([osf.io/gq5d8](https://osf.io/gq5d8)).



### Strengths and Limitations of this Study

- A comprehensive scoping review was conducted using a broad and inclusive search strategy and a large variety of databases were searched.
- The reviewers independently followed a structured and pre-published protocol for searching, screening and extracting data which followed the Joanna Briggs Institute methodology for scoping reviews and PRISMA-ScR guidelines.
- Only studies published in the English language were included, possibly resulting in articles of other languages being missed.
- Slight deviations in the original protocol were performed in order to make the data screening more feasible.

For peer review only

## INTRODUCTION

A number of studies and reviews have suggested that participation in the arts is beneficial for health[1-4]. Because of this, many healthcare and workplace settings offer art programmes, including art therapy, music and visual art displays, to reduce stress and improve wellbeing for staff, patients and customers[5]. However, there is little evidence that these programmes have the desired effects and there is a need for a high-quality evidence base for art-based interventions[1, 4].

Engagement with arts can be divided into active and passive participation. Active participation involves making, creating or teaching arts[2, 6]. This includes art therapy (where an art therapist directs the creation of artworks to achieve a particular goal and foster improved mental health and wellbeing), as well as other arts-based interventions that are not goal-driven and do not require a trained professional[7]. In contrast passive participation involves behaviours such as observing, viewing, listening and watching art[2, 6]. Passive viewing of artworks has the advantages of being an easy, low-cost and non-invasive intervention. This scoping review focussed on the effects of passively viewing visual artworks and therefore excluded research pertaining to the active participation in arts.

There is some evidence that viewing artworks as an intervention is beneficial; however, this evidence is not of uniformly high quality, is rarely critical, and is sparse, with many important theoretical and evidential gaps. As well as this, most of the evidence comes from anecdotes, descriptions and personal experiences, rather than empirical research[8, 9]. Although many settings have been used within this research, including healthcare, art museums and laboratories, there is a paucity of evidence to demonstrate whether these settings affect outcomes differently. Demographics may be important moderators as ethnicity, gender and age may influence preferences for certain types of artworks. However, rigorous research has yet to be conducted examining the influence of settings and populations.

Due to these limitations, it is important to review the existing evidence and identify any research gaps that need to be addressed. As the evidence base is small and heterogeneous, a systematic review could not be accurately completed and would be too restrictive, so instead a scoping review was conducted. The results can be used to direct future research to fill these gaps before a full systematic review can be completed.

There is no universally accepted definition of artworks as this construct has been inconsistent and debated. For the purpose of this review, artwork was defined as two-dimensional artistic works made primarily for their aesthetics, rather than any functional purpose. This definition was created from working definitions of visual and fine arts used in previous research[10, 11]. Based on this definition, this review included studies on paintings, drawings and prints and excluded studies on sculpture, films, interior design or architecture. Photographs were only included if they depicted artworks, as it was deemed too difficult to determine the difference between “artistic” photography and “non-artistic” photography based on the definition of artworks provided for this review. Digital artworks were included.

Viewing artworks is a form of visual environmental enrichment and is theorised to be stress-reducing through positive distraction[8, 12]. To explore this theory, the review focused on the effects of viewing visual artworks on stress outcomes. Both psychological and physiological stress outcomes were included.

### Objective and Research Questions

1  
2  
3 The aim of this scoping review was to systematically examine the extent of existing research  
4 available on the effects of viewing visual artworks on stress outcome measures and identify  
5 knowledge gaps to aid future research. The following research question was formulated: what  
6 research has been conducted on the effects of viewing visual artworks on stress outcomes in any  
7 populations and settings?  
8  
9

10 Several secondary questions were developed:

- 11 • What populations and settings were studied?
  - 12 • What stress outcomes were measured?
  - 13 • What type and content of artworks were viewed?
  - 14 • What was the duration of the artwork viewing and how many artworks were viewed?
  - 15 • Were the interventions effective in changing the outcomes?
  - 16 • What is the methodological quality of the existing studies?
- 17  
18  
19

## 20 **METHODS**

21 A preliminary search for previous reviews on this topic was conducted on Google Scholar, JBI  
22 Evidence Synthesis and the Cochrane Database of Systematic Reviews prior to creating the protocol.  
23  
24

### 25 **Protocol**

26 A scoping review protocol was developed based on the Joanna Briggs Institute (JBI) methodology for  
27 scoping reviews[13] and using the preferred reporting items for systematic reviews and meta-  
28 analyses extension for scoping reviews (PRISMA-ScR). The objectives, eligibility criteria and methods  
29 were specified in advance and documented in the protocol registered at [osf.io/gq5d8](https://osf.io/gq5d8).  
30  
31

### 32 **Eligibility Criteria**

33 Studies had to meet the following inclusion criteria; be a primary study where participants passively  
34 viewed at least one visual artwork as an intervention, including viewing paintings, drawings, prints,  
35 digital artwork, or photographs of artworks, and measured at least one stress outcome measure  
36 (physiological or psychological indices). Measures of anxiety or mood were not considered as direct  
37 measures of stress and therefore fell out of the scope of this review. Unpublished research, including  
38 working papers, theses/dissertations and conference proceedings were included if they were  
39 identified by the search.  
40  
41  
42

43 Studies were excluded if participants had active engagement in the arts (e.g. studies on art therapy  
44 or the production/creation of art), the study investigated the effects of interior design, architecture,  
45 sculpture, films or photography not depicting artworks, and review papers, including systematic  
46 reviews, scoping reviews and meta-analyses.  
47  
48

49 As per the scoping review objectives, there were no restrictions in terms of populations, contexts,  
50 dates of publication or study designs. However, during the screening phase, it was decided to  
51 exclude qualitative studies as these studies did not have clear stress outcomes, which was a key  
52 inclusion criterion. Only studies published in the English language were considered.  
53  
54

### 55 **Search Strategy**

56 To identify potentially relevant studies, the following electronic databases were systematically  
57 searched; Medline, Embase, APA PsycINFO, Cochrane CENTRAL, Scopus and Google Scholar (first 30  
58 pages), with the help of a subject librarian. The search string combined a set of artwork and stress  
59 terms within each set with "OR" and between the two sets with "AND." The search was first  
60

1  
2  
3 conducted using an extended list of search terms from the registered protocol; however, this search  
4 strategy resulted in a large number of irrelevant articles. Therefore, in the final search, some of the  
5 more ambiguous search terms were removed to refine the search further. For example, the term  
6 'drawing' was removed as this could refer both to artistic drawings and 'drawing' blood. The final  
7 search strategies for two example databases are presented in Table 1.  
8  
9

10 The grey literature was searched using the same search terms to identify any unpublished studies.  
11 Grey literature databases searched included; Google (limited to the first 20 pages), ProQuest theses  
12 and dissertations database, APA PsycExtra and Opengrey.eu.  
13

14 A search was then conducted by hand of the reference lists of relevant identified articles. Lastly, the  
15 'cited by' feature of Google Scholar was used to see if any of the relevant studies had been cited by  
16 undetected articles. All extracted references from these searches were imported to RefWorks and all  
17 duplicates removed. The final search was executed on 27 May 2020. The number of studies  
18 identified by the search strategy is shown in Figure 1.  
19  
20

### 21 **Screening and Study Selection**

22  
23 Screening of the studies identified by the search strategy was conducted by two independent  
24 reviewers using a two-staged approach using the programme Covidence ([www.covidence.org](http://www.covidence.org)). Due  
25 to the high volume and large number of unrelated studies identified, one author initially screened  
26 the titles and removed any irrelevant studies, before the first stage. In the first stage of screening,  
27 two reviewers independently screened the abstracts for the eligibility criteria. If a study's eligibility  
28 was judged to be uncertain, the article was included in the second stage. In the second stage, two  
29 reviewers screened the full texts of the studies to determine final inclusion or exclusion based on the  
30 eligibility criteria. The two stages were conducted by the reviewers independently, with the results  
31 of each stage discussed. Any disagreements related to eligibility of an article were discussed and  
32 agreement was reached. The two reviewers had overall 86% agreement. The number of included  
33 and excluded studies at each stage of the screening procedure is shown in Figure 1, with reasons for  
34 exclusion.  
35  
36  
37

### 38 **Data Extraction and Analysis**

39  
40 Data was extracted from each included study into a charting form by the two reviewers  
41 independently. This charting form was developed in accordance with the review questions. It  
42 included; publication details (i.e. title, year, authors), methodology (i.e. aims, design, population  
43 characteristics, setting, outcomes), artwork details (i.e. type and content of artwork, duration of  
44 artwork viewing, number of artworks), key findings related to scoping review questions, and items to  
45 assess methodological quality (i.e. registration details, comparator groups, randomisation, blinding,  
46 power analyses). The JBI methodology for scoping reviews[13] recommends that formal  
47 methodological quality analyses should not be conducted in a scoping review. Instead, a descriptive  
48 summary of methodological quality items is provided as a simple indicator of quality.  
49  
50

51 The charting form was iteratively refined during the extraction process to ensure all useful  
52 information was extracted. The charting form was first independently pilot tested by the two  
53 reviewers on a random sample of four studies. The reviewers discussed this process and amended  
54 the charting form by adding a column about the artwork viewing directives given to the participants.  
55 Data extraction was then completed for the remaining studies independently by the two reviewers  
56 and any inconsistencies were discussed. This extracted data is reported in tabular and descriptive  
57 text format to answer the review questions.  
58  
59  
60

## Patient and Public Involvement

Patients and the public were not involved in any phase of this review.

## RESULTS

As shown in Figure 1, the search strategy resulted in 3882 texts, which were screened for eligibility. After the initial title and abstract screening, the full text was retrieved for 53 articles and examined against the eligibility criteria. During this process, three theses were found to have matching published journal articles and therefore were excluded as duplicates. The remaining excluded articles did not meet the eligibility criteria. This screening narrowed the studies down to 14 articles for inclusion.

The design and key findings related to the stress outcomes of each study are briefly detailed in Table 2, with specific details regarding the secondary review questions provided in Table 3. All 14 articles were primary studies published as journal articles. Apart from the duplicate theses mentioned above, no grey literature met the eligibility criteria for inclusion. The studies' publication dates ranged from 1972 to 2020. Eight studies came from Europe[9, 14-20], four from the United States of America[10, 21-23] and one each from Australia[24] and New Zealand[25].

### Summary of Study Methodologies

**Designs.** The 14 studies had very different designs and methodologies (see Table 3). Only nine studies used a between groups design[9, 10, 14, 16, 17, 20, 22, 23, 25]. Another four used a within groups design, where measures were compared pre- to post-viewing the artworks, with no comparator groups[15, 18, 19, 24]. The final study used a cross-sectional design, measuring stress-reduction at one time-point[21].

Of the nine between groups designs, six used a no artwork control group as a comparator[9, 10, 17, 20, 22, 23], and one used scrambled versions of the artworks[25]. Although the remaining two studies had comparator groups, the viewing directives given to the groups[16] and the art experience of the participants in each group[14] were different, rather than the artwork viewed. Four of these between groups studies were considered randomised controlled trials (RCTs)[9, 10, 16, 20].

**Settings.** Six studies were conducted in an art gallery or museum[15, 16-19, 24], three in a laboratory[14, 22, 25], four in hospital rooms or hospital public spaces[9, 10, 21, 23], and one in senior citizens' apartments[20]. These settings represent a mix of both naturalistic settings with high ecological validity and laboratory settings with high experimental control.

**Populations.** The majority of studies investigated healthy participants in the form of students[14, 17, 22], office workers[15] or the general public[16, 18, 19, 25]. Other research used patient populations known to have high stress levels. Four studies investigated hospitalised patients[9, 21], with two being paediatric samples[10, 23]. Lastly, D'Cunha et al[24] investigated people living with dementia and Wikström et al[20], elderly women.

There is little research on whether population type affects stress reactions. Very few studies compared demographic factors, with the following exceptions. De Jong[14] found that having different art experience affected outcomes. Three studies found significant differences between the stress-reducing effects of viewing artwork between males and females[10, 15, 22]. Lastly, one study compared results across different health conditions, but found similar results between groups[21].

1  
2  
3 **Outcomes.** Nine studies explored only physiological stress measures[14, 16, 19, 20, 23-25], three  
4 explored only psychological stress measures[9, 21, 22] and the remaining two explored both[10, 15].  
5 The psychological stress measures included; the Cox Mackay Stress Arousal checklist[26], a stress  
6 adjective checklist[27], Likert scales, and a distress thermometer[28]. The physiological measures  
7 were mainly cardiovascular, including blood pressure, heart rate and skin conductance, which were  
8 measured in eight studies. Salivary biomarkers were measured in three studies[15, 24, 25] including  
9 cortisol, alpha-amylase and interleukin-6. Respiration was measured in two studies[10, 14].  
10  
11

## 12 **Summary of the Artwork Interventions**

13  
14 **Types of artworks.** 10 studies used physical artworks. Most were original paintings, however one  
15 study used posters depicting artworks[22] and another used a window mural[23]. Another three  
16 studies used digital reproductions of artworks. Two used slideshows of digital images[14, 25],  
17 whereas the third used the Open Window, which digitally projected artworks[9]. The last study  
18 directly compared physical artworks with their digital reproductions[18]. This study did not find any  
19 differences between the types of artwork, indicating that digital reproductions may be just as stress-  
20 reducing as physical artworks.  
21  
22

23 **Content of artworks.** The content ranged from representational nature images, to complex abstract  
24 artworks. Five studies provided an assortment of artwork content in one exhibition[15, 17, 21, 24]  
25 and therefore it could not be determined whether content was influential. Two studies investigated  
26 the effects of abstract artwork but did not compare these to another artwork type[16, 18]. Another  
27 study[14] compared the physiological effects of artworks rated to be 'ugly' or 'beautiful.' Although  
28 the exact content of the artwork was not described, this study did find that participants had higher  
29 skin conductance and respiration rates while viewing the 'beautiful' paintings, compared to the  
30 'ugly' paintings, demonstrating that the aesthetic content of the artwork may influence their effects.  
31  
32

33 Another four studies investigated the effects of viewing nature artworks. Two studies found that  
34 self-reported stress was lower when viewing nature artworks compared to abstract artworks[10,  
35 22]. One study found that different aspects of nature might have stronger effects; a forest mural  
36 resulted in larger blood pressure decreases than an aquatic mural[23]. Nature content may also  
37 affect biological indicators of stress responses; cortisol levels decreased faster after a stressor in  
38 people viewing scrambled versions of nature artworks, compared to the original nature  
39 artworks[25].  
40  
41

42 The remaining two studies[9, 20] did not report on the content of the artwork and therefore, cannot  
43 be categorised.  
44  
45

46 **Duration of artwork viewing.** Nine studies reported the duration participants spent looking at the  
47 artwork (see Table 3). This ranged from two minutes to over 48 hours. No study investigated  
48 whether changing the duration of exposure to artworks affected stress outcomes.  
49

50 **Quantity of artworks.** Most of the studies did not specify the exact number of artworks viewed. Of  
51 those studies that did specify a number, it ranged from one artwork to over 5300 in one exhibition.  
52 Half of the studies had participants view a collection of artworks as an exhibition or art programme.  
53 Only two studies showed each participant one artwork and both were in paediatric hospital  
54 rooms[10, 23]. The other experimental studies ranged from viewing four to 26 artworks in one  
55 sitting, with the exact numbers provided in Table 3.  
56  
57

58 **Viewing directives.** Five studies explicitly mentioned the viewing directives given to participants. The  
59 researchers from two experimental studies told participants to attentively look at and explore each  
60



1  
2  
3 artwork[14, 18], whereas the researcher in another study asked visitors to explore the art gallery in  
4 any way they pleased[15]. The remaining two studies asked participants to discuss and describe each  
5 artwork to the group during art programmes[20, 24]. One of these studies[24] had a trained art  
6 educator facilitating the discussions, whereas the other[20] had a lead researcher, with no specified  
7 training.  
8  
9

### 10 **Summary of Key Findings**

11 All but one of the studies that measured self-reported stress found a significant decrease after  
12 viewing artwork[10, 15, 21, 22], with the final study showing no significant changes[9]. A consistent  
13 decrease in systolic blood pressure was also found across the four studies measuring blood  
14 pressure[10, 17, 20, 23]. Skin conductance and skin conductance variability both increased while  
15 viewing artworks[14, 16, 19]. The results for heart rate were mostly consistent. Two of the three  
16 studies that measured heart rate found that viewing artworks decreased heart rate[19, 23]. The  
17 other study found that viewing beautiful paintings increased heart rate for students trained in fine  
18 arts and decreased heart rate for other participants[14].  
19  
20  
21

22 The cortisol and respiration results were less consistent. An art gallery visit decreased salivary  
23 cortisol levels[15]; however, a six week art intervention for people living with dementia increased  
24 waking cortisol levels[24]. Lastly, after a stressor, salivary cortisol decreased faster in those viewing  
25 scrambled images, compared to those viewing landscapes[25]. Viewing beautiful paintings lead to an  
26 increase in respiration rates in a healthy sample[14]. Whereas nature artworks in a hospital room  
27 decreased respiration rates in children[10]. These studies all had different samples, settings and  
28 artworks which may have accounted for these mixed findings. Lastly both alpha-amylase[25] and  
29 interleukin- 6[24] were each only measured in one study and showed no significant changes.  
30  
31  
32

### 33 **Summary of Methodological Quality**

34 A full quality analysis is not recommended for a scoping review and many of the studies lacked  
35 sufficient methodological details. Therefore, a simple descriptive summary of key quality issues was  
36 performed as an indicator of possible quality issues. None of the studies were pre-registered.  
37 Sample sizes ranged from 27 to 826 participants; however, only two studies conducted a power  
38 analysis to determine their sample size. Krauss et al's[16] power analysis gave a required sample size  
39 of at least 68, and a final sample of 75 was recruited. The power analysis in McCabe et al[9] gave 200  
40 participants and a sample of 199 were recruited; however, only 164 were included in the analyses.  
41 The other 12 studies did not provide a power analysis. Law et al[25] was a pilot study, and was not  
42 expected to conduct a power analysis to determine sample size. Therefore, it is difficult to  
43 determine if all studies were adequately powered.  
44  
45  
46

47 Only nine studies had comparator groups, with only seven related to the artwork intervention. For  
48 most studies, it was difficult to blind the participants, because in most cases participants were  
49 explicitly asked to view particular artworks, and therefore both the researcher and participants were  
50 aware of which artworks they were viewing. However, two studies did successfully blind the study as  
51 both the researchers/nurses collecting the stress measures and the participants themselves were  
52 not explicitly made aware of the presence (or absence) of the artworks[23, 25]. All nine between-  
53 groups studies reported randomisation of participants to groups. However, the method of  
54 randomisation was not stated in many studies. Only four studies[9, 10, 16, 20] were RCTs, which are  
55 the gold-standard of research.  
56  
57

### 58 **DISCUSSION**

1  
2  
3 This scoping review aimed to examine the existing research on the effects of viewing visual artworks  
4 on stress outcomes and identify gaps in the research. The 14 included studies demonstrate research  
5 in this area is growing, with 10 studies being published in the last 10 years. However, there is still a  
6 paucity of high-quality research, and the evidence that does exist has heterogeneous methodologies  
7 and interventions, creating difficulty in comparing and directly summarising the results. Despite this,  
8 the scoping review was able to gather sufficient evidence to address the research questions outlined  
9 in the introduction and identify gaps for future research, as detailed below.  
10  
11

12 Overall, the evidence supports the claim that viewing artworks can reduce stress, in particular self-  
13 reported stress and systolic blood pressure. These preliminary quantitative results support  
14 qualitative research showing that viewing artworks provides positive distraction from a hospital  
15 environment and lowers self-reported stress[9, 12, 29]. The findings indicated that digital artworks  
16 can have similar stress-reducing effects to physical artworks, thus increasing the avenues available  
17 for viewers. Artwork interventions can therefore be transposed onto computers, TVs, phones and  
18 tablets, as a portable, cheap and easy intervention for stress-reduction.  
19  
20

21 Together the results suggest that the provision of artworks could be an effective stress-reduction  
22 intervention. However, mixed findings combined with a lack of homologous methodologies means  
23 that this claim about effective stress-reduction cannot be concluded without more rigorous  
24 research. Future research needs to ensure better methodological quality including: adequate  
25 comparator groups, power analyses to ensure sufficient sample sizes, clearly defined randomisation  
26 procedures and pre-registration. If we examine the results from just the four RCTs, the evidence is  
27 even less conclusive. More detail on these studies and their findings are provided in Table 2;  
28 however, only one of the four RCTs showed significant effects for their main hypotheses. Wikström  
29 et al[20] found a significant decrease in systolic blood pressure after an art intervention. In contrast,  
30 McCabe et al[9] found no significant effects on distress measures, and Eisen et al[10] only found  
31 significant effects when subgroup analyses of age were conducted. Lastly, Krauss et al[16] did find  
32 significant decreases in physiological stress when viewing artworks compared to baseline; however,  
33 they found no significant differences between the viewing directives provided, which was their main  
34 hypothesis. Therefore, more RCTs still need to be conducted on this topic for clearer conclusions to  
35 be made.  
36  
37  
38  
39

40 The differences between the studies suggest important moderating factors, one of which is setting.  
41 The museum context may add to the effects of viewing artwork, as museum related factors may lead  
42 to greater appreciation of artwork[30]. In addition, viewing artwork in a museum usually involves  
43 walking, which has its own stress-reducing effects[31]. Laboratory studies remove some of these  
44 contextual factors and may provide more specific evidence for the effects of viewing artworks, but  
45 they have lower ecological validity. The hospital room is an important setting as patients are often  
46 confined to their room for long time-periods and rooms are often deprived of environmental  
47 enrichment. Artwork could act as visual stimulation to positively distract patients from their stress,  
48 pain and medical conditions, and therefore it is suggested that artwork is placed in hospital rooms  
49 and waiting rooms. Artwork could also have stress-reducing benefits in other settings such as  
50 waiting rooms and workplaces, which are often related to high stress. More research in these  
51 settings should be conducted.  
52  
53  
54

55 Other possible moderating factors include individual characteristics, although little research has  
56 investigated these. Gender differences were found in two of the included studies, with a trend  
57 towards females experiencing greater stress-reduction in response to nature artworks[10, 22]. One  
58 small survey found that African Americans and Caucasians have similar preferences for nature  
59 artworks[32]; however, no study has investigated whether culture affects the stress-reducing effects  
60



1  
2  
3 of artworks. Given the diversity in cultures, demographics and individual preferences for artwork, it  
4 may be over simplistic to suggest that all individuals experience artwork the same way[33].  
5

6 The findings indicate that the content and aesthetic qualities of artwork are also important  
7 considerations. Although mixed, the studies generally indicated that nature, especially greenery,  
8 may be the most stress-reducing. This is consistent with research demonstrating that nature artwork  
9 is most preferred by adults[34] and children[10]. There are two main theories as to why viewing  
10 nature is beneficial for humans. The evolutionary theory proposes that because humans evolved in a  
11 natural environment, nature is processed more efficiently and we are predisposed to experience  
12 restoration[35]. On the other hand, the attention restoration theory posits that nature can  
13 counteract the mental fatigue caused by stress and therefore reduce cognitive strain[36]. Thus,  
14 these two theories point to nature artwork as having the greatest stress reducing effects, as  
15 demonstrated in this review. In contrast, abstract artworks can be seen as challenging, ambiguous  
16 and unclear for viewers, leading to increased stress[30, 37]. This is supported by the emotional  
17 congruence theory which posits that stressed people are likely to project their negative experiences  
18 and emotions onto ambiguous environmental surroundings, including artworks[5]. Other artwork  
19 content could be provocative and emotionally inappropriate for certain situations, eliciting anger  
20 and dislike. For example, a study by Ho and colleagues[33] found that certain provocative artworks  
21 elicited feelings of loneliness and hopelessness in viewers, suggesting artwork must be chosen  
22 carefully, with particular emphasis on the provision of nature artworks.  
23  
24  
25  
26

27 The mixed findings suggest that under some conditions, viewing artwork may be physiologically  
28 relaxing, whereas under other conditions viewing artwork may be physiologically stimulating. The  
29 direction of these effects may not only depend upon the content of the artwork, but also the context  
30 and viewers' stress levels. Regardless of the direction of effects on physiology, lower self-reported  
31 stress may result.  
32  
33

34 Although this review focussed on the stress-reducing effects of viewing artwork, it may also be  
35 important to investigate the stimulating aspects of artwork. For certain populations, such as people  
36 living with dementia, visual stimulation and enrichment through artworks could improve other  
37 aspects of health, such as cognitive function[24]. As discussed above, visual stimulation and  
38 enrichment may also be important to provide positive distraction from negative experiences. Three  
39 studies showed an increase in physiological stress[14, 24, 25]. This increased stimulation may be  
40 related to the content of the artworks ('beautiful' vs 'ugly' paintings[14], or landscapes vs scrambled  
41 images[25]) or the types of populations involved (people living with dementia[24] and art  
42 students[14]). Therefore, the provision of stimulating artworks may be appropriate for certain  
43 situations, including for people living with dementia.  
44  
45  
46

47 Choice may be another important variable. This is especially pertinent in settings where people have  
48 little control. Art Carts have been used in hospitals to allow patients to choose which artworks to  
49 view during their stay to give them a sense of control over their environment[29]. Two studies in this  
50 review[9, 20] gave participants a choice of artwork, however research is yet to investigate whether  
51 the element of choice affects stress outcomes.  
52  
53

54 Directives given to viewers may influence the way participants view artworks and therefore  
55 moderate the artworks' stress-reducing effects. Wikström[38] previously discussed the importance  
56 of creating an art-dialogue when viewing and discussing artworks in order to improve engagement,  
57 understanding and empowerment. Other research[33] demonstrated that the descriptions given to  
58 viewers about artwork could be influential, and therefore this may be an important element for  
59  
60

1  
2  
3 studies to include. However, few studies reported the directives given. It is important for future  
4 research to report what directives were provided and investigate whether this is influential.  
5

6 Finally, it is difficult to determine the dose-response relationship of artwork viewing. There was little  
7 consistency in the number of artworks shown to each participant, and no study investigated  
8 whether the quantity of artworks or viewing durations mattered. Therefore, future research could  
9 investigate the best artwork viewing duration and number of works.  
10

### 11 **Limitations**

12 This review is limited by only including articles published in the English language. Articles in other  
13 languages could have been missed. The review deviated slightly from the original protocol. Due to  
14 the large number of irrelevant articles identified using the original search strategy, the search terms  
15 were narrowed and the original title screening was only conducted by one reviewer. These  
16 deviations were required to make the search and screening more feasible. This review did not  
17 include anxiety or mood measures or studies using qualitative methodology, as these outcomes  
18 were considered outside the scope of the review.  
19  
20  
21  
22

### 23 **Conclusions**

24 This scoping review summarised research on the effects of viewing visual artworks on stress  
25 outcomes. 14 studies met the eligibility criteria, with consistent reductions in self-reported stress,  
26 but mixed effects on physiology. This research suggests that the provision of artworks could be an  
27 effective stress-reduction intervention. However, most of the research was low quality, with many  
28 methodological details missing, and there was high heterogeneity in research methodologies.  
29 Setting, individual characteristics, artwork content, and viewing instructions may be important  
30 moderating factors. More robust research, using standardised methods and RCTs, is needed before  
31 strong conclusions can be made about the effects of viewing visual art on stress outcomes.  
32  
33  
34  
35  
36  
37  
38  
39  
40  
41  
42  
43  
44  
45  
46  
47  
48  
49  
50  
51  
52  
53  
54  
55  
56  
57  
58  
59  
60

## References

1. Boyce M, Bungay H, Munn-Giddings C, et al. The impact of the arts in healthcare on patients and service users: A critical review. *Health Soc Care Community* 2018;26(4):458-73. <https://doi.org/10.1111/hsc.12502>
2. Carswell C, Reid J, Walsh I, et al. Arts-based interventions for hospitalised patients with cancer: A systematic literature review. *British Journal of Healthcare Management* 2018;24(12):611-6. <https://doi.org/10.12968/bjhc.2018.24.12.611>
3. Van Lith T. Art therapy in mental health: A systematic review of approaches and practices. *Arts Psychother* 2016;47:9-22. <https://doi.org/10.1016/j.aip.2015.09.003>
4. Vetter D, Barth J, Uyulmaz S, et al. Effects of art on surgical patients: a systematic review and meta-analysis. *Ann Surg* 2015;262(5):704-13. <https://doi.org/10.1097/SLA.0000000000001480>
5. Hathorn K, Nanda U. A guide to evidence-based art. *The Center for Health Design* 2008:1-22.
6. Davies CR, Rosenberg M, Knuihan M, et al. Defining arts engagement for population-based health research: Art forms, activities and level of engagement. *Arts Health* 2012;4(3):203-16. <https://doi.org/10.1080/17533015.2012.656201>
7. Spooner H. Embracing a full spectrum definition of art therapy. *Art Ther* 2016;33(3):163-6. <https://doi.org/10.1080/07421656.2016.1199249>
8. Lankston L, Cusack P, Fremantle C, et al. Visual art in hospitals: Case studies and review of the evidence. *J R Soc Med* 2010;103(12):490-9. <https://doi.org/10.1258/jrsm.2010.100256>
9. McCabe C, Roche D, Hegarty F, et al. 'Open Window': A randomized trial of the effect of new media art using a virtual window on quality of life in patients' experiencing stem cell transplantation. *Psycho-Oncology* 2013;22(2):330-7. <https://doi.org/10.1002/pon.2093>
10. Eisen SL, Ulrich RS, Shepley MM, et al. The stress-reducing effects of art in pediatric health care: Art preferences of healthy children and hospitalized children. *Journal of Child Health Care* 2008;12(3):173-90. <https://doi.org/10.1177/1367493508092507>
11. Lacey S, Hagtvedt H, Patrick VM, et al. Art for reward's sake: Visual art recruits the ventral striatum. *Neuroimage* 2011;55(1):420-33. <https://doi.org/10.1016/j.neuroimage.2010.11.027>
12. George DR, de Boer C, Green MJ. "That landscape is where I'd like to be...": Offering patients with cancer a choice of artwork *JAMA*. 2017;317(9):890-2. <https://doi.org/10.1001/jama.2017.1233>
13. Peters MDJ, Godfrey CM, Mclnerney P, et al. Chapter 11: Scoping reviews (2020 version). In: Aromataris E, Munn Z, eds. *JBI Manual for Evidence Synthesis*, JBI 2020. <https://doi.org/10.46658/JBIMES-20-12>
14. de Jong MA. A physiological approach to aesthetic preference. I. Paintings. *Psychother Psychosom* 1972;20(6):360-5. <https://doi.org/10.1159/000286439>
15. Clow A, Fredhoi C. Normalisation of salivary cortisol levels and self-report stress by a brief lunchtime visit to an art gallery by London City workers. *Journal of Holistic Healthcare* 2006;3(2):29-32.

- 1  
2  
3 16. Krauss L, Ott C, Opwis K, et al. Impact of contextualizing information on aesthetic experience and  
4 psychophysiological responses to art in a museum: A naturalistic randomized controlled trial. *Psychol*  
5 *Aesthet Creat Arts* 2019;Advanced Online Publication. <https://doi.org/10.1037/aca0000280>  
6  
7 17. Mastandrea S, Maricchiolo F, Carrus G, et al. Visits to figurative art museums may lower blood  
8 pressure and stress. *Arts Health* 2019;11(2):1-10. <https://doi.org/10.1080/17533015.2018.1443953>  
9  
10 18. Siri F, Ferroni F, Ardizzi M, et al. Behavioral and autonomic responses to real and digital  
11 reproductions of works of art. *Prog Brain Res* 2018;237:201-21.  
12 <https://doi.org/10.1016/bs.pbr.2018.03.020>  
13  
14 19. Tschacher W, Greenwood S, Kirchberg V, et al. Physiological correlates of aesthetic perception of  
15 artworks in a museum. *Psychol Aesthet, Creat Arts* 2012;6(1):96. <https://doi.org/10.1037/a0023845>  
16  
17 20. Wikström B, Theorell T, Sandström S. Medical health and emotional effects of art stimulation in  
18 old age. *Psychother Psychosom* 1993;60(3-4):195-206. <https://doi.org/10.1159/000288693>  
19  
20 21. Karnik M, Printz B, Finkel J. A hospital's contemporary art collection: effects on patient mood,  
21 stress, comfort, and expectations. *HERD* 2014;7(3):60-77.  
22 <https://doi.org/10.1177/193758671400700305>  
23  
24 22. Kweon B, Ulrich R, Walker V, et al. Anger and stress: The role of landscape posters in an office  
25 setting. *Environ Behav* 2008;40(3):355-81. <https://doi.org/10.1177/0013916506298797>  
26  
27 23. Pearson M, Gaines K, Pati D, et al. The physiological impact of window murals on pediatric  
28 patients. *HERD* 2019;12(2):116-29. <https://doi.org/10.1177/1937586718800483>  
29  
30 24. D'Cunha NM, McKune AJ, Isbel S, et al. Psychophysiological responses in people living with  
31 dementia after an art gallery intervention: An exploratory study. *J Alzheimer's Dis* 2019;72(2):549-62.  
32 <https://doi.org/10.3233/JAD-190784>  
33  
34 25. Law M, Minissale G, Lambert A, et al. Viewing landscapes is more stimulating than scrambled  
35 images after a stressor: A cross-disciplinary approach. *Front Psychol* 2020;10:3092.  
36 <https://doi.org/10.3389/fpsyg.2019.03092>  
37  
38 26. Mackay C, Cox T, Burrows G, et al. An inventory for the measurement of self-reported stress and  
39 arousal. *Br J Soc Clin Psychol* 1978;17(3):283-4. <https://doi.org/10.1111/j.2044-8260.1978.tb00280.x>  
40  
41 27. King MG, Burrows GD, Stanley GV. Measurement of stress and arousal: Validation of the  
42 stress/arousal adjective checklist. *Br J Psychol* 1983;74(4):473-9. <https://doi.org/10.1111/j.2044-8295.1983.tb01880.x>  
43  
44 28. Roth AJ, Kornblith AB, Batel-Copel L, et al. Rapid screening for psychologic distress in men with  
45 prostate carcinoma: A pilot study. *Cancer* 1998;82(10):1904-8. [https://doi.org/10.1002/\(sici\)1097-0142\(19980515\)82:10<1904::aid-cnrcr13>3.0.co;2-x](https://doi.org/10.1002/(sici)1097-0142(19980515)82:10<1904::aid-cnrcr13>3.0.co;2-x)  
46  
47 29. Suter E, Baylin D. Choosing art as a complement to healing. *Appl Nurs Res* 2007;20(1):32-8.  
48 <https://doi.org/10.1016/j.apnr.2005.11.004>  
49  
50 30. Mastandrea S. Visitor's approaches, personality traits and psycho-physiological well-being in  
51 different art style museums. *International and Interdisciplinary Conference on Digital Environments*  
52 *for Education, Arts and Heritage*; Springer; 2018.  
53  
54  
55  
56  
57  
58  
59  
60

- 1  
2  
3 31. Kelly P, Williamson C, Niven AG, et al. Walking on sunshine: Scoping review of the evidence for  
4 walking and mental health. *Br J Sports Med* 2018;52(12):800-6. [http://dx.doi.org/10.1136/bjsports-](http://dx.doi.org/10.1136/bjsports-2017-098827)  
5 2017-098827  
6  
7 32. Hathorn K, Ulrich R. The therapeutic art program of Northwestern Memorial Hospital. *Creating*  
8 *Environments that Heal: Proceedings of the Symposium On Healthcare Design*; 2001.  
9  
10 33. Ho RT, Potash JS, Fang F, et al. Art viewing directives in hospital settings effect on mood. *HERD*  
11 2015;8(3):30-43. <https://doi.org/10.1177/1937586715575903>  
12  
13 34. Nanda U, Eisen SL, Baladandayuthapani V. Undertaking an art survey to compare patient versus  
14 student art preferences. *Environ Behav* 2008;40(2):269-301.  
15 <https://doi.org/10.1177/0013916507311552>  
16  
17 35. Ulrich R, Simons R, Miles M. Effects of environmental simulations and television on blood donor  
18 stress. *J Archit Plann Res* 2003;20(1):38-47. <https://www.jstor.org/stable/43030641>  
19  
20 36. Kaplan S. The restorative benefits of nature: Toward an integrative framework. *J Environ Psychol*  
21 1995;15:169-82. [https://doi.org/10.1016/0272-4944\(95\)90001-2](https://doi.org/10.1016/0272-4944(95)90001-2)  
22  
23 37. Ulrich R. How design impacts wellness. *Healthc Forum J* 1992;35(5):20-5.  
24  
25 38. Wikström B. The dynamics of visual art dialogues: Experiences to be used in hospital settings  
26 with visual art enrichment. *Nurs Res Practi* 2011;2011:204594.  
27 <https://doi.org/10.1155/2011/204594>  
28  
29  
30  
31  
32  
33  
34  
35

36 **Authors' contributions:** ML and EB conceptualised the project and designed the scoping review  
37 protocol. ML performed the search strategy. ML and NK performed the study screening and data  
38 extraction. ML wrote the manuscript. EB and NK edited the manuscript. All authors approved the  
39 final manuscript. ML made the revisions to the manuscript.  
40

41 **Funding statement:** This research received no specific grant from any funding agency in the public,  
42 commercial or not-for-profit sectors.  
43

44 **Competing interests:** None  
45  
46  
47  
48  
49  
50  
51  
52  
53  
54  
55  
56  
57  
58  
59  
60

**Figure 1.** PRISMA-ScR flow diagram of the study selection process

For peer review only

1  
2  
3  
4  
5  
6  
7  
8  
9  
10  
11  
12  
13  
14  
15  
16  
17  
18  
19  
20  
21  
22  
23  
24  
25  
26  
27  
28  
29  
30  
31  
32  
33  
34  
35  
36  
37  
38  
39  
40  
41  
42  
43  
44  
45  
46  
47  
48  
49  
50  
51  
52  
53  
54  
55  
56  
57  
58  
59  
60

Table 1

*Example search strategy syntax for databases*

| Database                          | Search Strategy Syntax                                                                                                                                                                                                                                                                                                                                                                                                                                                                           |
|-----------------------------------|--------------------------------------------------------------------------------------------------------------------------------------------------------------------------------------------------------------------------------------------------------------------------------------------------------------------------------------------------------------------------------------------------------------------------------------------------------------------------------------------------|
| Scopus                            | ( TITLE-ABS-KEY ( artwork OR "art work" OR "visual art" OR "art museum" OR painting OR mural OR "works of art" OR "viewing art" OR "viewing artwork" OR "artwork viewing" OR "art gallery" OR "art galleries" ) AND TITLE-ABS-KEY ( stress OR "blood pressure" OR anxiety OR "heart rate" OR mood OR norepinephrine OR epinephrine OR "stress hormones" OR stressor OR glucocorticoids OR cortisol OR alpha-amylase OR "stress reduction" ) ) AND ( LIMIT TO ( LANGUAGE , "English" ) )          |
| ProQuest Dissertations and Thesis | ab(artwork OR "art work" OR "visual art" OR "art museum" OR painting OR mural OR "works of art" OR museum OR "viewing art" OR "artistic work" OR "viewing artwork" OR "artwork viewing" OR "art gallery" OR "art galleries") AND ab(stress OR "blood pressure" OR anxiety OR respiration OR "heart rate" OR mood OR norepinephrine OR epinephrine OR "stress hormones" OR "mental health" OR stressor OR glucocorticoids OR cortisol OR alpha-amylase OR "immune marker" OR "stress reduction" ) |



Table 2

Summaries of the studies' designs and key stress outcome findings

| Study                     | Study Design and Methods                                                                                                                                                                                                                                                                                                                                                                                                               | Key Findings                                                                                                                                                                                                                                                                                                                                                                                                        |
|---------------------------|----------------------------------------------------------------------------------------------------------------------------------------------------------------------------------------------------------------------------------------------------------------------------------------------------------------------------------------------------------------------------------------------------------------------------------------|---------------------------------------------------------------------------------------------------------------------------------------------------------------------------------------------------------------------------------------------------------------------------------------------------------------------------------------------------------------------------------------------------------------------|
| Clow & Fredhoi (2006)[15] | Studied self-reported stress and arousal, and salivary cortisol levels in a group of London city workers during a lunchtime visit to an art gallery. Measurements were taken before and after the 35-40-minute gallery visit to explore pre-post intervention changes.                                                                                                                                                                 | Self-reported stress and salivary cortisol levels both decreased over the intervention. There were no differences in arousal levels.                                                                                                                                                                                                                                                                                |
| D'Cunha et al (2019)[24]  | Evaluated the psychophysiological effects of attending the National Art Gallery of Australia Art and Dementia programme. People living with dementia attended the group-based, six-week programme which involved viewing and discussing artworks, led by an art director. Measures of salivary cortisol and interleukin-6 were taken at baseline, at the end of the programme and 12 weeks later.                                      | Waking salivary cortisol levels increased from baseline to post-intervention, but decreased at follow-up. No changes in evening cortisol or interleukin-6 were observed. The ratio of waking to evening cortisol increased from baseline to post-intervention indicating a more dynamic diurnal cortisol rhythm.                                                                                                    |
| de Jong (1972)[14]        | Three groups of participants (advanced art history students, advanced fine art students and laboratory workers as controls) viewed projections of 12 paintings considered to be 'beautiful' and 12 paintings considered to be 'ugly' in a random order while their heart rate, respiration rate and skin conductance was measured continuously.                                                                                        | The fine arts and art history students showed a greater change in skin conductance than the laboratory workers. Respiration and skin conductance were higher during the 'beautiful' paintings than the 'ugly' paintings in all groups. The fine arts students had faster heart rate during the 'beautiful' paintings compared to the 'ugly' paintings, however, for the other two groups, this result was reversed. |
| Eisen et al (2008)[10]    | The third phase this study investigated which type of art was most effective in reducing stress in paediatric patients. On arrival to the hospital, patients were randomly allocated to one of three rooms; a room with a nature artwork, a room with an abstract artwork or a room with no artwork. Self-reported stress, blood pressure and respiratory rate were taken at baseline and after two hours of exposure to the artworks. | Overall, there were no significant differences between the groups on stress, blood pressure or respiration. However, sub-analyses showed that significantly more males than females in the 8-10 age group were positively affected by the nature artwork, as demonstrated by decreased self-reported stress, blood pressure and respiratory rates.                                                                  |
| Karnik et al (2014)[21]   | Installed a diverse collection of artworks in the public spaces and clinic rooms of a hospital. Patients were retrospectively contacted with a survey which included evaluating whether the art installations changed their self-reported stress levels.                                                                                                                                                                               | 61% of the patients that reported seeing the artworks stated that the artworks somewhat or significantly reduced their stress levels.                                                                                                                                                                                                                                                                               |



|    |                      |                                                                           |                                                                        |
|----|----------------------|---------------------------------------------------------------------------|------------------------------------------------------------------------|
| 1  |                      |                                                                           |                                                                        |
| 2  |                      |                                                                           |                                                                        |
| 3  | Krauss et al         | Participants viewed six Flemish expressionism artworks in an art          | There were no significant differences in heart rate, heart rate        |
| 4  | (2019)[16]           | museum, while heart rate and skin conductance were continuously           | variability or skin conductance between the two groups. However, in    |
| 5  |                      | measured. Participants were randomly assigned to either receive           | both groups heart rate was lower, and skin conductance and heart       |
| 6  |                      | descriptive information about the artworks (described the artwork in a    | rate variability higher when viewing the artworks, compared to         |
| 7  |                      | declarative way) or elaborative information about the artworks            | baseline.                                                              |
| 8  |                      | (described the context and deeper meaning behind the artworks).           |                                                                        |
| 9  |                      |                                                                           |                                                                        |
| 10 | Kweon et al          | Conducted an experiment investigating the effects of artwork posters on   | Males had the highest stress levels in the office with no posters, and |
| 11 | (2008)[22]           | stress and anger levels in an office setting. Students were asked to      | the lowest stress levels in the office with mixed art posters. On the  |
| 12 |                      | complete a series of stress and anger provoking computer tasks in one of  | other hand, females had the highest stress in the office with all      |
| 13 |                      | four different mock office conditions; an office with nature posters,     | abstract posters and the lowest levels in the office with all nature   |
| 14 |                      | abstract posters, both nature and abstract posters or no posters. Levels  | posters. However, these results were only significant for males and    |
| 15 |                      | of self-reported stress were measured across the experiment.              | not females.                                                           |
| 16 |                      |                                                                           |                                                                        |
| 17 | Law et al (2020)[25] | Conducted a pilot study to investigate whether nature artworks could      | Salivary cortisol levels decreased more rapidly while viewing the      |
| 18 |                      | improve recovery from a laboratory stressor. Participants were            | scrambled images compared to the landscape artworks. There were        |
| 19 |                      | randomised to either view a 30-minute digital slideshow of landscape      | no changes in alpha-amylase across the experiment or between           |
| 20 |                      | artworks or digitally scrambled versions of these artworks after being    | groups.                                                                |
| 21 |                      | exposed to a laboratory stressor. Saliva samples were taken at baseline,  |                                                                        |
| 22 |                      | after the stressor, during the art viewing and after the art viewing to   |                                                                        |
| 23 |                      | measure cortisol and alpha-amylase.                                       |                                                                        |
| 24 |                      |                                                                           |                                                                        |
| 25 | Mastandrea et al     | Students visited an art museum and were randomly assigned to visit one    | Systolic blood pressure decreased in all groups; however, this         |
| 26 | (2019)[17]           | of three art exhibitions for five minutes; a figurative art exhibition, a | decrease was only significant in the figurative art group. Heart rate  |
| 27 |                      | modern art exhibition or a museum office as a control condition. Blood    | also decreased in all three groups, however, there was no significant  |
| 28 |                      | pressure and heart rate were measured before and after the visit.         | differences between groups.                                            |
| 29 |                      |                                                                           |                                                                        |
| 30 | McCabe et al         | Evaluated the effects of the Open Window art intervention on stem-cell    | Results demonstrated no significant differences in levels of distress  |
| 31 | (2013)[9]            | transplantation patients. The Open Window is a virtual window which is    | between the two groups at any of the time-points.                      |
| 32 |                      | installed in a hospital room, where the patients can switch through nine  |                                                                        |
| 33 |                      | art channels with different artworks. Patients were randomised to either  |                                                                        |
| 34 |                      | a room with the Open Window or not. Self-reported distress was            |                                                                        |
| 35 |                      | measured at admission, the day before transplant, seven days after        |                                                                        |
| 36 |                      | transplant, prior to discharge, and 60 days, 100 days and six months      |                                                                        |
| 37 |                      | post-transplant.                                                          |                                                                        |
| 38 |                      |                                                                           |                                                                        |
| 39 | Pearson et al        | Examined the impact of nature-themed window murals on physiological       | Those patients with the window murals had significant improvements     |
| 40 | (2019)[23]           | measures in paediatric patients. Paediatric patients were assigned to     | in heart rate and systolic blood pressure, with the tree-themed mural  |
| 41 |                      | hospital rooms with either a fish-themed window mural, a tree-themed      | having the greatest effect.                                            |

1  
2  
3  
4  
5  
6  
7  
8  
9  
10  
11  
12  
13  
14  
15  
16  
17  
18  
19  
20  
21  
22  
23  
24  
25  
26  
27  
28  
29  
30  
31  
32  
33  
34  
35  
36  
37  
38  
39  
40  
41  
42  
43  
44  
45  
46

window mural or no window mural. Patients’ blood pressure and heart rate were taken retrospectively from the patients’ medical records.

Siri et al (2018)[18]

Examined the effects of viewing original physical artworks and their digital reproductions within a museum context. Cardiovascular variables were measured via ECG continuously in healthy volunteers while viewing two real abstract paintings and their digital reproductions.

Results showed that there was a significant difference in heart rate between viewing the two real paintings, but no difference was found between the digital reproductions, or between the real and digital reproductions. No differences in heart rate variability were found.

Tschacher et al (2012)[19]

Monitored the physiology of visitors to an art museum using an electronic sensor glove which recorded physiological data and locomotion activity while they viewed the artworks. Afterwards, they were asked to rate the aesthetic qualities of some of the artworks.

Heart rate variability increased while viewing artworks that were deemed beautiful, high quality and surprising/humorous. Skin conductance variability increased, and heart rate decreased while viewing more dominant artworks (artworks experienced as dominant and stimulating by the viewers).

Wikström et al (1993)[20]

Investigated whether visual stimulation could improve the health of elderly women living alone. The women were randomised to either an intervention or control group. The intervention group were shown a selection of pictures, including artworks, and asked to discuss them, whereas the control group discussed current events. Blood pressure was measured at baseline, immediately after the intervention and four months later.

The intervention group had significantly lower systolic blood pressure than the control group after the intervention and at follow-up

Table 3

Overview of studies included in the review

| Study                     | Country        | Study Design                                               | Comparator Group                      | Setting                                 | Population (N)                                                                          | Stress Outcome Measures                                                  | Type and Content of Artwork                                                                                                                                        | Quantity of Artworks Viewed by Each Participant | Duration of Artwork Viewing                                     |
|---------------------------|----------------|------------------------------------------------------------|---------------------------------------|-----------------------------------------|-----------------------------------------------------------------------------------------|--------------------------------------------------------------------------|--------------------------------------------------------------------------------------------------------------------------------------------------------------------|-------------------------------------------------|-----------------------------------------------------------------|
| Clow & Fredhoi (2006)[15] | United Kingdom | Pre- and post-test, within groups quasi-experimental study | None                                  | Art gallery                             | Office workers N=28 (25 included in the analysis)                                       | Self-reported stress<br>Self-reported arousal<br>Salivary cortisol       | Physical artworks in a gallery- exact content not specified                                                                                                        | Not specified- gallery exhibition               | 35-40 minutes in the gallery                                    |
| D'Cunha et al (2019)[24]  | Australia      | Pre- and post-test, within groups quasi-experimental study | None                                  | Art gallery                             | People living with dementia N=28 (22 included in the analysis)                          | Salivary cortisol<br>interleukin-6                                       | Physical artworks in a gallery- exact content not specified                                                                                                        | 3-4 artworks each session, over 5-6 sessions    | 5-6x 90-minute sessions. Each artwork was viewed for 20 minutes |
| de Jong (1972)[14]        | Netherlands    | Between groups experimental study                          | Laboratory workers (non-art students) | Laboratory                              | Advanced art history students, advanced fine arts students and laboratory workers N= 27 | Heart rate<br>Skin conductance<br>Respiration rate                       | Digital projections of 12 paintings considered 'beautiful' and 12 paintings considered 'ugly'                                                                      | 24                                              | Each painting was viewed for 10 seconds                         |
| Eisen et al (2008)[10]    | USA            | Pre- and post-test, randomised controlled trial            | Room with no artwork                  | Hospital-patients' room                 | Paediatric patients (aged 5-17) N=78                                                    | Self-reported stress<br>Heart rate<br>Blood pressure<br>Respiratory rate | One group had a representational nature artwork hung on the wall, whereas the other group had an abstract artwork hung on the wall                                 | 1                                               | 2 hours                                                         |
| Karnik et al (2014)[21]   | USA            | Cross-sectional survey                                     | None                                  | Hospital-public spaces and clinic rooms | Hospital patients N= 826                                                                | Self-reported change in stress                                           | Physical collection of abstract and representational imagery (including nature imagery). Includes an assortment of artistic media; and a variety of subject matter | Collection of over 5300 artworks                | N/A                                                             |
| Krauss et al (2019)[16]   | Switzerland    | Randomised controlled trial                                | Group received only descriptive       | Art museum                              | General public aged between 18 and 35 N= 75                                             | Heart rate<br>Heart rate variability                                     | Physical abstract paintings of Flemish expressionism                                                                                                               | 6                                               | Not specified                                                   |

1  
2  
3  
4  
5  
6  
7  
8  
9  
10  
11  
12  
13  
14  
15  
16  
17  
18  
19  
20  
21  
22  
23  
24  
25  
26  
27  
28  
29  
30  
31  
32  
33  
34  
35  
36  
37  
38  
39  
40  
41  
42  
43  
44  
45  
46

information about the artwork (compared to elaborative information)

Skin conductance

|                             |             |                                                             |                                |                                        |                                                                          |                                                          |                                                                                                                                                                         |                                                                     |                                                                     |
|-----------------------------|-------------|-------------------------------------------------------------|--------------------------------|----------------------------------------|--------------------------------------------------------------------------|----------------------------------------------------------|-------------------------------------------------------------------------------------------------------------------------------------------------------------------------|---------------------------------------------------------------------|---------------------------------------------------------------------|
| Kweon et al (2008)[22]      | USA         | Between groups experimental study                           | No artwork posters group       | Laboratory (replicated office setting) | Psychology students N=210                                                | Self-reported stress                                     | Nature posters and abstract posters                                                                                                                                     | 4                                                                   | Not specified                                                       |
| Law et al (2020)[25]        | New Zealand | Between groups experimental pilot study                     | Scrambled artwork images       | Laboratory                             | General public N=30                                                      | Salivary cortisol<br>Salivary alpha-amylase              | Digital slideshow of either landscape paintings or digitally scrambled versions of these paintings                                                                      | 26                                                                  | 30 minutes                                                          |
| Mastandrea et al (2019)[17] | Italy       | Between groups experimental study                           | Museum office                  | Art museum                             | Undergraduate students N=77                                              | Blood pressure<br>Heart rate                             | Physical artworks in a gallery- including figurative artworks (e.g. landscapes and portraits) and modern artworks (e.g. abstract, impressionist and informal paintings) | Not specified- gallery exhibition                                   | 5 minutes                                                           |
| McCabe et al (2013)[9]      | Ireland     | Randomised prospective clinical trial                       | Room without the 'Open Window' | Hospital-patients' room                | Stem cell transplantation patients N= 199 (164 included in the analysis) | Self-reported distress                                   | Virtual window, with artwork projections. Artwork collections ranged from visually complex abstract images to images of nature.                                         | Not specified- 9 art 'channels,' each with a collection of artworks | For the duration of their hospital stay-times not specified         |
| Pearson et al (2019)[23]    | USA         | Pre- and post-test, between groups quasi-experimental study | Room without a window mural    | Hospital-patients' room                | Paediatric patients aged 2-18) N=90                                      | Heart rate<br>Systolic blood pressure                    | Window mural- either aquatic or forest themed                                                                                                                           | 1                                                                   | Minimum of 48 hours                                                 |
| Siri et al (2018)[18]       | Italy       | Within groups experimental study                            | None                           | Art museum                             | General public N=60                                                      | Heart rate<br>Heart rate variability                     | 2 real abstract contemporary paintings and their digitally produced replicates                                                                                          | 4                                                                   | 144 seconds per artwork                                             |
| Tschacher et al (2012)[19]  | Switzerland | Within groups quasi-experimental study                      | None                           | Art museum                             | Museum visitors N=517 (373 included in the analysis)                     | Skin conductance<br>Heart rate<br>Heart rate variability | Physical modern and contemporary art exhibition                                                                                                                         | 76                                                                  | No specific timeframe given to participants. On average, they spent |

28 minutes at the gallery.

|                           |        |                                                |                                    |                          |                         |                         |                                                                                                                                                |                                                |               |
|---------------------------|--------|------------------------------------------------|------------------------------------|--------------------------|-------------------------|-------------------------|------------------------------------------------------------------------------------------------------------------------------------------------|------------------------------------------------|---------------|
| Wikström et al (1993)[20] | Sweden | Pre- and post-test randomised controlled trial | Group that were not shown artworks | Senior citizen apartment | Women aged over 70 N=40 | Systolic blood pressure | Physical pictures- ranging from artworks of nature, flowers and people, abstract patterns, white figures on black backgrounds and photographs. | Not specified how many each participant viewed | Not specified |
|---------------------------|--------|------------------------------------------------|------------------------------------|--------------------------|-------------------------|-------------------------|------------------------------------------------------------------------------------------------------------------------------------------------|------------------------------------------------|---------------|

For peer review only

1  
2  
3  
4  
5  
6  
7  
8  
9  
10  
11  
12  
13  
14  
15  
16  
17  
18  
19  
20  
21  
22  
23  
24  
25  
26  
27  
28  
29  
30  
31  
32  
33  
34  
35  
36  
37  
38  
39  
40  
41  
42  
43  
44  
45  
46

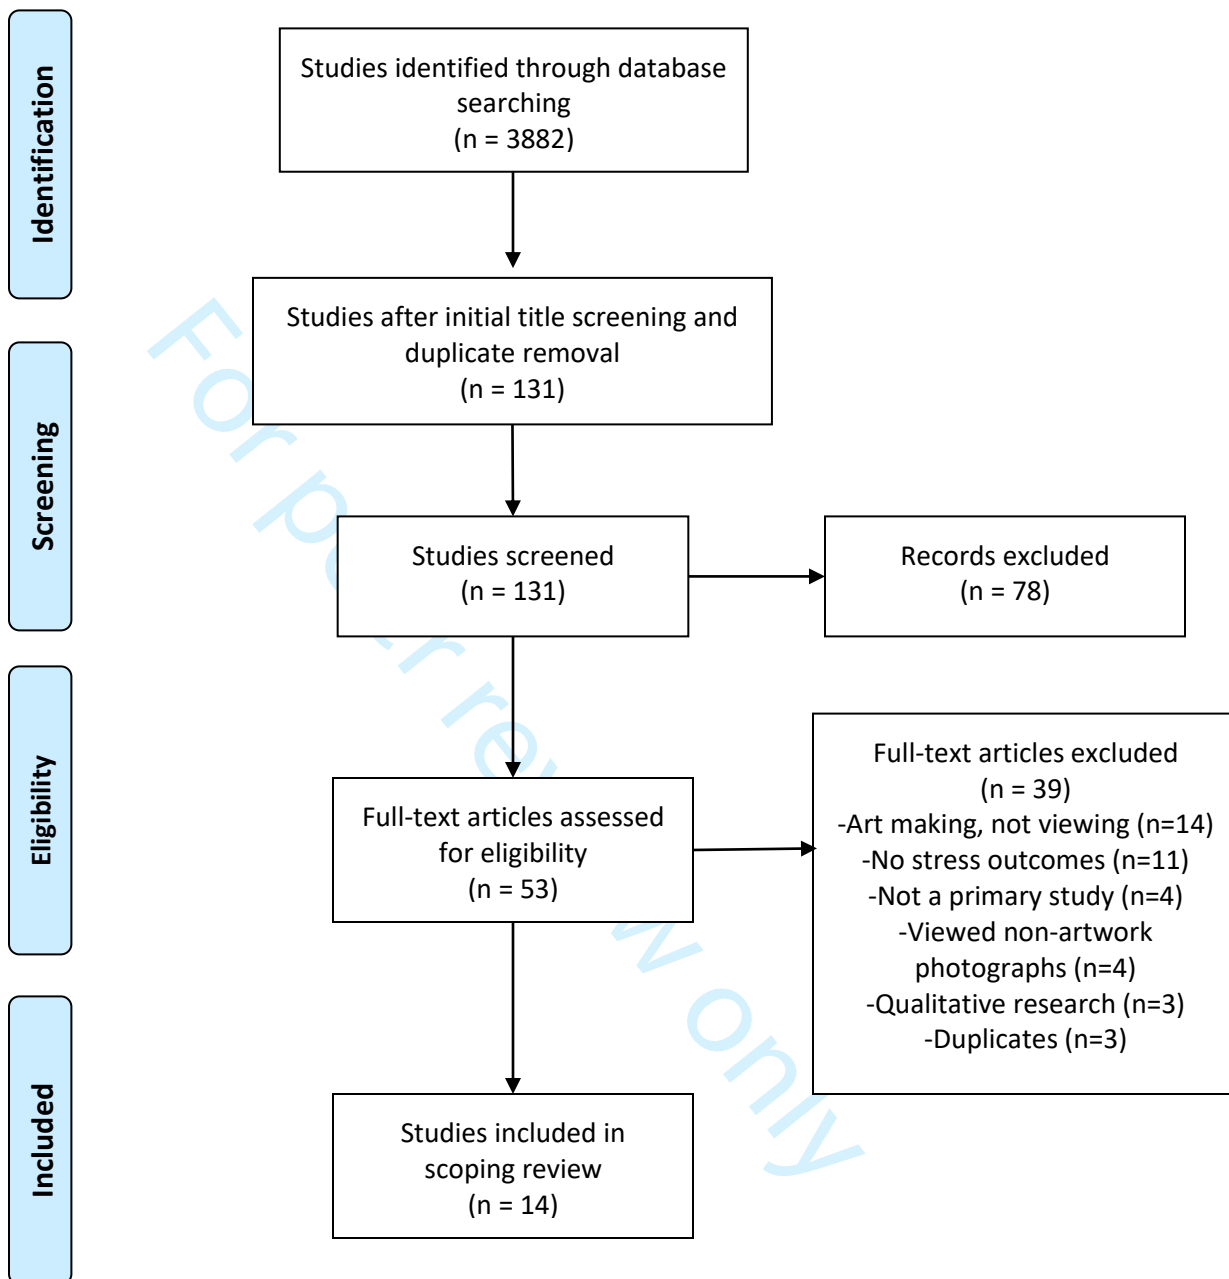

## Preferred Reporting Items for Systematic reviews and Meta-Analyses extension for Scoping Reviews (PRISMA-ScR) Checklist

| SECTION                                               | ITEM | PRISMA-ScR CHECKLIST ITEM                                                                                                                                                                                                                                                                                  | REPORTED ON PAGE # |
|-------------------------------------------------------|------|------------------------------------------------------------------------------------------------------------------------------------------------------------------------------------------------------------------------------------------------------------------------------------------------------------|--------------------|
| <b>TITLE</b>                                          |      |                                                                                                                                                                                                                                                                                                            |                    |
| Title                                                 | 1    | Identify the report as a scoping review.                                                                                                                                                                                                                                                                   |                    |
| <b>ABSTRACT</b>                                       |      |                                                                                                                                                                                                                                                                                                            |                    |
| Structured summary                                    | 2    | Provide a structured summary that includes (as applicable): background, objectives, eligibility criteria, sources of evidence, charting methods, results, and conclusions that relate to the review questions and objectives.                                                                              |                    |
| <b>INTRODUCTION</b>                                   |      |                                                                                                                                                                                                                                                                                                            |                    |
| Rationale                                             | 3    | Describe the rationale for the review in the context of what is already known. Explain why the review questions/objectives lend themselves to a scoping review approach.                                                                                                                                   |                    |
| Objectives                                            | 4    | Provide an explicit statement of the questions and objectives being addressed with reference to their key elements (e.g., population or participants, concepts, and context) or other relevant key elements used to conceptualize the review questions and/or objectives.                                  |                    |
| <b>METHODS</b>                                        |      |                                                                                                                                                                                                                                                                                                            |                    |
| Protocol and registration                             | 5    | Indicate whether a review protocol exists; state if and where it can be accessed (e.g., a Web address); and if available, provide registration information, including the registration number.                                                                                                             |                    |
| Eligibility criteria                                  | 6    | Specify characteristics of the sources of evidence used as eligibility criteria (e.g., years considered, language, and publication status), and provide a rationale.                                                                                                                                       |                    |
| Information sources*                                  | 7    | Describe all information sources in the search (e.g., databases with dates of coverage and contact with authors to identify additional sources), as well as the date the most recent search was executed.                                                                                                  |                    |
| Search                                                | 8    | Present the full electronic search strategy for at least 1 database, including any limits used, such that it could be repeated.                                                                                                                                                                            |                    |
| Selection of sources of evidence†                     | 9    | State the process for selecting sources of evidence (i.e., screening and eligibility) included in the scoping review.                                                                                                                                                                                      |                    |
| Data charting process‡                                | 10   | Describe the methods of charting data from the included sources of evidence (e.g., calibrated forms or forms that have been tested by the team before their use, and whether data charting was done independently or in duplicate) and any processes for obtaining and confirming data from investigators. |                    |
| Data items                                            | 11   | List and define all variables for which data were sought and any assumptions and simplifications made.                                                                                                                                                                                                     |                    |
| Critical appraisal of individual sources of evidence§ | 12   | If done, provide a rationale for conducting a critical appraisal of included sources of evidence; describe the methods used and how this information was used in any data synthesis (if appropriate).                                                                                                      |                    |
| Synthesis of results                                  | 13   | Describe the methods of handling and summarizing the data that were charted.                                                                                                                                                                                                                               |                    |

| SECTION                                       | ITEM | PRISMA-ScR CHECKLIST ITEM                                                                                                                                                                       | REPORTED ON PAGE # |
|-----------------------------------------------|------|-------------------------------------------------------------------------------------------------------------------------------------------------------------------------------------------------|--------------------|
| <b>RESULTS</b>                                |      |                                                                                                                                                                                                 |                    |
| Selection of sources of evidence              | 14   | Give numbers of sources of evidence screened, assessed for eligibility, and included in the review, with reasons for exclusions at each stage, ideally using a flow diagram.                    |                    |
| Characteristics of sources of evidence        | 15   | For each source of evidence, present characteristics for which data were charted and provide the citations.                                                                                     |                    |
| Critical appraisal within sources of evidence | 16   | If done, present data on critical appraisal of included sources of evidence (see item 12).                                                                                                      |                    |
| Results of individual sources of evidence     | 17   | For each included source of evidence, present the relevant data that were charted that relate to the review questions and objectives.                                                           |                    |
| Synthesis of results                          | 18   | Summarize and/or present the charting results as they relate to the review questions and objectives.                                                                                            |                    |
| <b>DISCUSSION</b>                             |      |                                                                                                                                                                                                 |                    |
| Summary of evidence                           | 19   | Summarize the main results (including an overview of concepts, themes, and types of evidence available), link to the review questions and objectives, and consider the relevance to key groups. |                    |
| Limitations                                   | 20   | Discuss the limitations of the scoping review process.                                                                                                                                          |                    |
| Conclusions                                   | 21   | Provide a general interpretation of the results with respect to the review questions and objectives, as well as potential implications and/or next steps.                                       |                    |
| <b>FUNDING</b>                                |      |                                                                                                                                                                                                 |                    |
| Funding                                       | 22   | Describe sources of funding for the included sources of evidence, as well as sources of funding for the scoping review. Describe the role of the funders of the scoping review.                 |                    |

JBI = Joanna Briggs Institute; PRISMA-ScR = Preferred Reporting Items for Systematic reviews and Meta-Analyses extension for Scoping Reviews.

\* Where *sources of evidence* (see second footnote) are compiled from, such as bibliographic databases, social media platforms, and Web sites.

† A more inclusive/heterogeneous term used to account for the different types of evidence or data sources (e.g., quantitative and/or qualitative research, expert opinion, and policy documents) that may be eligible in a scoping review as opposed to only studies. This is not to be confused with *information sources* (see first footnote).

‡ The frameworks by Arksey and O'Malley (6) and Levac and colleagues (7) and the JBI guidance (4, 5) refer to the process of data extraction in a scoping review as data charting.

§ The process of systematically examining research evidence to assess its validity, results, and relevance before using it to inform a decision. This term is used for items 12 and 19 instead of "risk of bias" (which is more applicable to systematic reviews of interventions) to include and acknowledge the various sources of evidence that may be used in a scoping review (e.g., quantitative and/or qualitative research, expert opinion, and policy document).

From: Tricco AC, Lillie E, Zarin W, O'Brien KK, Colquhoun H, Levac D, et al. PRISMA Extension for Scoping Reviews (PRISMA-ScR): Checklist and Explanation. *Ann Intern Med.* ;169:467–473. doi: 10.7326/M18-0850





# BMJ Open

## Evidence for the effects of Viewing Visual Artworks on Stress Outcomes: A Scoping Review

|                                 |                                                                                                                                                                                       |
|---------------------------------|---------------------------------------------------------------------------------------------------------------------------------------------------------------------------------------|
| Journal:                        | <i>BMJ Open</i>                                                                                                                                                                       |
| Manuscript ID                   | bmjopen-2020-043549.R2                                                                                                                                                                |
| Article Type:                   | Original research                                                                                                                                                                     |
| Date Submitted by the Author:   | 05-Apr-2021                                                                                                                                                                           |
| Complete List of Authors:       | Law, Mikaela; The University of Auckland, Psychological Medicine<br>Karulkar, Nikita; The University of Auckland, Psychological Medicine<br>Broadbent, E; The University of Auckland, |
| <b>Primary Subject Heading</b>: | Complementary medicine                                                                                                                                                                |
| Secondary Subject Heading:      | Medical management, Mental health, Research methods                                                                                                                                   |
| Keywords:                       | COMPLEMENTARY MEDICINE, MENTAL HEALTH, PSYCHIATRY, SOCIAL MEDICINE                                                                                                                    |
|                                 |                                                                                                                                                                                       |

SCHOLARONE™  
Manuscripts



I, the Submitting Author has the right to grant and does grant on behalf of all authors of the Work (as defined in the below author licence), an exclusive licence and/or a non-exclusive licence for contributions from authors who are: i) UK Crown employees; ii) where BMJ has agreed a CC-BY licence shall apply, and/or iii) in accordance with the terms applicable for US Federal Government officers or employees acting as part of their official duties; on a worldwide, perpetual, irrevocable, royalty-free basis to BMJ Publishing Group Ltd ("BMJ") its licensees and where the relevant Journal is co-owned by BMJ to the co-owners of the Journal, to publish the Work in this journal and any other BMJ products and to exploit all rights, as set out in our [licence](#).

The Submitting Author accepts and understands that any supply made under these terms is made by BMJ to the Submitting Author unless you are acting as an employee on behalf of your employer or a postgraduate student of an affiliated institution which is paying any applicable article publishing charge ("APC") for Open Access articles. Where the Submitting Author wishes to make the Work available on an Open Access basis (and intends to pay the relevant APC), the terms of reuse of such Open Access shall be governed by a Creative Commons licence – details of these licences and which [Creative Commons](#) licence will apply to this Work are set out in our licence referred to above.

Other than as permitted in any relevant BMJ Author's Self Archiving Policies, I confirm this Work has not been accepted for publication elsewhere, is not being considered for publication elsewhere and does not duplicate material already published. I confirm all authors consent to publication of this Work and authorise the granting of this licence.

1  
2  
3 **Evidence for the effects of Viewing Visual Artworks on Stress Outcomes: A Scoping Review**  
4  
5  
6  
7

8  
9 Mikaela Law (MHLthPsysc), Nikita Karulkar (BSc) & Elizabeth Broadbent (PhD)  
10  
11

12  
13  
14  
15 All authors are affiliated with the Department of Psychological Medicine, The University of  
16 Auckland, Private Bag 92019, Auckland 1142, New Zealand  
17  
18

19  
20  
21  
22  
23  
24 **Corresponding author:**

25 Elizabeth Broadbent

26 [e.broadbent@auckland.ac.nz](mailto:e.broadbent@auckland.ac.nz)

27 The University of Auckland

28 Building 507,

29 28 Park Avenue, Grafton, 1023

30 Auckland, New Zealand

31 [+64 9 923 6756](tel:+6499236756)  
32  
33  
34  
35  
36  
37  
38  
39  
40  
41  
42  
43  
44  
45  
46  
47  
48  
49  
50  
51  
52  
53  
54  
55  
56  
57  
58  
59  
60

## **Abstract**

**Objective:** To review the existing evidence on the effects of viewing visual artworks on stress outcomes and outline any gaps in the research.

**Design:** A scoping review was conducted based on the Joanna Briggs Institute methodology for scoping reviews and using the preferred reporting items for systematic reviews and meta-analyses extension for scoping reviews. Two independent reviewers performed the screening and data extraction.

**Data Sources:** Medline, Embase, APA PsycINFO, Cochrane CENTRAL, Scopus, Google Scholar, Google, ProQuest Theses and Dissertations Database, APA PsycExtra and OpenGrey.eu were searched in May 2020.

**Eligibility Criteria:** Studies were included if they investigated the effects of viewing at least one visual artwork on at least one stress outcome measure. Studies involving active engagement with art, review papers or qualitative studies were excluded. There were no limits in terms of year of publication, contexts or population types; however, only studies published in the English language were considered.

**Data Extraction and Synthesis:** Information extracted from manuscripts included: study methodologies, population and setting characteristics, details of the artwork interventions, key findings and details related to methodological quality.

**Results:** 14 primary studies were identified, with heterogeneous study designs, methodologies and artwork interventions. The results of these studies demonstrated consistent reductions in self-reported stress after viewing artworks, but mixed effects on physiological stress measures. The methodological quality of the studies was poor, with many important methodological details missing.

**Conclusions:** There is promising evidence for effects of viewing artwork on reducing stress. Moderating factors may include setting, individual characteristics, artwork content, and viewing instructions. More robust research, using more standardised methods and randomised controlled trials, is needed.

**Registration Details:** A protocol for this review is registered with the Open Science Framework ([osf.io/gq5d8](https://osf.io/gq5d8)).

### Strengths and Limitations of this Study

- A comprehensive scoping review was conducted using a broad and inclusive search strategy and a large variety of databases were searched.
- The reviewers independently followed a structured and pre-published protocol for searching, screening and extracting data which followed the Joanna Briggs Institute methodology for scoping reviews and PRISMA-ScR guidelines.
- Only studies published in the English language were included, possibly resulting in articles of other languages being missed.
- Slight deviations in the original protocol were performed in order to make the data screening more feasible.

For peer review only

## INTRODUCTION

A number of studies and reviews have suggested that participation in the arts is beneficial for health[1-4]. Because of this, many healthcare and workplace settings offer art programmes, including art therapy, music and visual art displays, to reduce stress and improve wellbeing for staff, patients and customers[5]. However, there is little evidence that these programmes have the desired effects and there is a need for a high-quality evidence base for art-based interventions[1, 4].

Engagement with arts can be divided into active and passive participation. Active participation involves making, creating or teaching arts[2, 6]. This includes art therapy (where an art therapist directs the creation of artworks to achieve a particular goal and foster improved mental health and wellbeing), as well as other arts-based interventions that are not goal-driven and do not require a trained professional[7]. In contrast passive participation involves behaviours such as observing, viewing, listening and watching art[2, 6]. Passive viewing of artworks has the advantages of being an easy, low-cost and non-invasive intervention. This scoping review focussed on the effects of passively viewing visual artworks and therefore excluded research pertaining to the active participation in arts.

There is some evidence that viewing artworks as an intervention is beneficial; however, this evidence is not of uniformly high quality, is rarely critical, and is sparse, with many important theoretical and evidential gaps. As well as this, most of the evidence comes from anecdotes, descriptions and personal experiences, rather than empirical research[8, 9]. Although many settings have been used within this research, including healthcare, art museums and laboratories, there is a paucity of evidence to demonstrate whether these settings affect outcomes differently. Demographics may be important moderators as ethnicity, gender and age may influence preferences for certain types of artworks. However, rigorous research has yet to be conducted examining the influence of settings and populations.

Due to these limitations, it is important to review the existing evidence and identify any research gaps that need to be addressed. As the evidence base is small and heterogeneous, a systematic review could not be accurately completed and would be too restrictive, so instead a scoping review was conducted. The results can be used to direct future research to fill these gaps before a full systematic review can be completed.

There is no universally accepted definition of artworks as this construct has been inconsistent and debated. For the purpose of this review, artwork was defined as two-dimensional artistic works made primarily for their aesthetics, rather than any functional purpose. This definition was created from working definitions of visual and fine arts used in previous research[10, 11]. Based on this definition, this review included studies on paintings, drawings and prints and excluded studies on sculpture, films, interior design or architecture. Photographs were only included if they depicted artworks, as it was deemed too difficult to determine the difference between “artistic” photography and “non-artistic” photography based on the definition of artworks provided for this review. Digital artworks were included.

Viewing artworks is a form of visual environmental enrichment and is theorised to be stress-reducing through positive distraction[8, 12]. To explore this theory, the review focused on the effects of viewing visual artworks on stress outcomes. Both psychological and physiological stress outcomes were included.

### Objective and Research Questions

1  
2  
3 The aim of this scoping review was to systematically examine the extent of existing research  
4 available on the effects of viewing visual artworks on stress outcome measures and identify  
5 knowledge gaps to aid future research. The following research question was formulated: what  
6 research has been conducted on the effects of viewing visual artworks on stress outcomes in any  
7 populations and settings?  
8  
9

10 Several secondary questions were developed:

- 11 • What populations and settings were studied?
  - 12 • What stress outcomes were measured?
  - 13 • What type and content of artworks were viewed?
  - 14 • What was the duration of the artwork viewing and how many artworks were viewed?
  - 15 • Were the interventions effective in changing the outcomes?
  - 16 • What is the methodological quality of the existing studies?
- 17  
18  
19

## 20 **METHODS**

21 A preliminary search for previous reviews on this topic was conducted on Google Scholar, JBI  
22 Evidence Synthesis and the Cochrane Database of Systematic Reviews prior to creating the protocol.  
23  
24

### 25 **Protocol**

26 A scoping review protocol was developed based on the Joanna Briggs Institute (JBI) methodology for  
27 scoping reviews[13] and using the preferred reporting items for systematic reviews and meta-  
28 analyses extension for scoping reviews (PRISMA-ScR). The objectives, eligibility criteria and methods  
29 were specified in advance and documented in the protocol registered at [osf.io/gq5d8](https://osf.io/gq5d8).  
30  
31

### 32 **Eligibility Criteria**

33 Studies had to meet the following inclusion criteria; be a primary study where participants passively  
34 viewed at least one visual artwork as an intervention, including viewing paintings, drawings, prints,  
35 digital artwork, or photographs of artworks, and measured at least one stress outcome measure  
36 (physiological or psychological indices). Measures of anxiety or mood were not considered as direct  
37 measures of stress and therefore fell out of the scope of this review. Unpublished research, including  
38 working papers, theses/dissertations and conference proceedings were included if they were  
39 identified by the search.  
40  
41  
42

43 Studies were excluded if participants had active engagement in the arts (e.g. studies on art therapy  
44 or the production/creation of art), the study investigated the effects of interior design, architecture,  
45 sculpture, films or photography not depicting artworks, and review papers, including systematic  
46 reviews, scoping reviews and meta-analyses.  
47  
48

49 As per the scoping review objectives, there were no restrictions in terms of populations, contexts,  
50 dates of publication or study designs. However, during the screening phase, it was decided to  
51 exclude qualitative studies as these studies did not have clear stress outcomes, which was a key  
52 inclusion criterion. Only studies published in the English language were considered.  
53  
54

### 55 **Search Strategy**

56 To identify potentially relevant studies, the following electronic databases were systematically  
57 searched; Medline, Embase, APA PsycINFO, Cochrane CENTRAL, Scopus and Google Scholar (first 30  
58 pages), with the help of a subject librarian. The search string combined a set of artwork and stress  
59 terms within each set with "OR" and between the two sets with "AND." The search was first  
60

1  
2  
3 conducted using an extended list of search terms from the registered protocol; however, this search  
4 strategy resulted in a large number of irrelevant articles. Therefore, in the final search, some of the  
5 more ambiguous search terms were removed to refine the search further. For example, the term  
6 'drawing' was removed as this could refer both to artistic drawings and 'drawing' blood. The final  
7 search strategies for two example databases are presented in Table 1.  
8  
9

10 The grey literature was searched using the same search terms to identify any unpublished studies.  
11 Grey literature databases searched included; Google (limited to the first 20 pages), ProQuest theses  
12 and dissertations database, APA PsycExtra and Opengrey.eu.  
13

14 A search was then conducted by hand of the reference lists of relevant identified articles. Lastly, the  
15 'cited by' feature of Google Scholar was used to see if any of the relevant studies had been cited by  
16 undetected articles. All extracted references from these searches were imported to RefWorks and all  
17 duplicates removed. The final search was executed on 27 May 2020. The number of studies  
18 identified by the search strategy is shown in Figure 1.  
19  
20

### 21 **Screening and Study Selection**

22  
23 Screening of the studies identified by the search strategy was conducted by two independent  
24 reviewers using a two-staged approach using the programme Covidence ([www.covidence.org](http://www.covidence.org)). Due  
25 to the high volume and large number of unrelated studies identified, one author initially screened  
26 the titles and removed any irrelevant studies, before the first stage. In the first stage of screening,  
27 two reviewers independently screened the abstracts for the eligibility criteria. If a study's eligibility  
28 was judged to be uncertain, the article was included in the second stage. In the second stage, two  
29 reviewers screened the full texts of the studies to determine final inclusion or exclusion based on the  
30 eligibility criteria. The two stages were conducted by the reviewers independently, with the results  
31 of each stage discussed. Any disagreements related to eligibility of an article were discussed and  
32 agreement was reached. The two reviewers had overall 86% agreement. The number of included  
33 and excluded studies at each stage of the screening procedure is shown in Figure 1, with reasons for  
34 exclusion.  
35  
36  
37

### 38 **Data Extraction and Analysis**

39  
40 Data was extracted from each included study into a charting form by the two reviewers  
41 independently. This charting form was developed in accordance with the review questions. It  
42 included; publication details (i.e. title, year, authors), methodology (i.e. aims, design, population  
43 characteristics, setting, outcomes), artwork details (i.e. type and content of artwork, duration of  
44 artwork viewing, number of artworks), key findings related to scoping review questions, and items to  
45 assess methodological quality (i.e. registration details, comparator groups, randomisation, blinding,  
46 power analyses). The JBI methodology for scoping reviews[13] recommends that formal  
47 methodological quality analyses should not be conducted in a scoping review. Instead, a descriptive  
48 summary of methodological quality items is provided as a simple indicator of quality.  
49  
50

51 The charting form was iteratively refined during the extraction process to ensure all useful  
52 information was extracted. The charting form was first independently pilot tested by the two  
53 reviewers on a random sample of four studies. The reviewers discussed this process and amended  
54 the charting form by adding a column about the artwork viewing directives given to the participants.  
55 Data extraction was then completed for the remaining studies independently by the two reviewers  
56 and any inconsistencies were discussed. This extracted data is reported in tabular and descriptive  
57 text format to answer the review questions.  
58  
59  
60



## Patient and Public Involvement

Patients and the public were not involved in any phase of this review.

## RESULTS

As shown in Figure 1, the search strategy resulted in 3882 texts, which were screened for eligibility. After the initial title and abstract screening, the full text was retrieved for 53 articles and examined against the eligibility criteria. During this process, three theses were found to have matching published journal articles and therefore were excluded as duplicates. The remaining excluded articles did not meet the eligibility criteria. This screening narrowed the studies down to 14 articles for inclusion.

The design and key findings related to the stress outcomes of each study are briefly detailed in Table 2, with specific details regarding the secondary review questions provided in Table 3. All 14 articles were primary studies published as journal articles. Apart from the duplicate theses mentioned above, no grey literature met the eligibility criteria for inclusion. The studies' publication dates ranged from 1972 to 2020. Eight studies came from Europe[9, 14-20], four from the United States of America[10, 21-23] and one each from Australia[24] and New Zealand[25].

### Summary of Study Methodologies

**Designs.** The 14 studies had very different designs and methodologies (see Table 3). Only nine studies used a between groups design[9, 10, 14, 16, 17, 20, 22, 23, 25]. Another four used a within groups design, where measures were compared pre- to post-viewing the artworks, with no comparator groups[15, 18, 19, 24]. The final study used a cross-sectional design, measuring stress-reduction at one time-point[21].

Of the nine between groups designs, six used a no artwork control group as a comparator[9, 10, 17, 20, 22, 23], and one used scrambled versions of the artworks[25]. Krauss et al.[16] gave different viewing directives to each group and de Jong[14] had groups with different art experience levels. Four of these between groups studies were considered randomised controlled trials (RCTs)[9, 10, 16, 20].

**Settings.** Six studies were conducted in an art gallery or museum[15, 16-19, 24], three in a laboratory[14, 22, 25], four in hospital rooms or hospital public spaces[9, 10, 21, 23], and one in senior citizens' apartments[20]. These settings represent a mix of both naturalistic settings with high ecological validity and laboratory settings with high experimental control.

**Populations.** The majority of studies investigated healthy participants in the form of students[14, 17, 22], office workers[15] or the general public[16, 18, 19, 25]. Other research used patient populations known to have high stress levels. Four studies investigated hospitalised patients[9, 21], with two being paediatric samples[10, 23]. Lastly, D'Cunha et al[24] investigated people living with dementia and Wikström et al[20], elderly women.

There is little research on whether population type affects stress reactions. Very few studies compared demographic factors, with the following exceptions. De Jong[14] found that having different art experience affected outcomes. Three studies found significant differences between the stress-reducing effects of viewing artwork between males and females[10, 15, 22]. Lastly, one study compared results across different health conditions, but found similar results between groups[21].

**Outcomes.** Nine studies explored only physiological stress measures[14, 16, 19, 20, 23-25], three explored only psychological stress measures[9, 21, 22] and the remaining two explored both[10, 15].

1  
2  
3 The psychological stress measures included; the Cox Mackay Stress Arousal checklist[26], a stress  
4 adjective checklist[27], Likert scales, and a distress thermometer[28]. The physiological measures  
5 were mainly cardiovascular, including blood pressure, heart rate and skin conductance, which were  
6 measured in eight studies. Salivary biomarkers were measured in three studies[15, 24, 25] including  
7 cortisol, alpha-amylase and interleukin-6. Respiration was measured in two studies[10, 14].  
8  
9

### 10 **Summary of the Artwork Interventions**

11  
12 **Types of artworks.** 10 studies used physical artworks. Most were original paintings, however one  
13 study used posters depicting artworks[22] and another used a window mural[23]. Another three  
14 studies used digital reproductions of artworks. Two used slideshows of digital images[14, 25],  
15 whereas the third used the Open Window, which digitally projected artworks[9]. The last study  
16 directly compared physical artworks with their digital reproductions[18]. This study did not find any  
17 differences between the types of artwork, indicating that digital reproductions may be just as stress-  
18 reducing as physical artworks.  
19

20  
21 **Content of artworks.** The content ranged from representational nature images, to complex abstract  
22 artworks. Five studies provided an assortment of artwork content in one exhibition[15, 17, 21, 24]  
23 and therefore it could not be determined whether content was influential. Two studies investigated  
24 the effects of abstract artwork but did not compare these to another artwork type[16, 18]. Another  
25 study[14] compared the physiological effects of artworks rated to be 'ugly' or 'beautiful.' Although  
26 the exact content of the artwork was not described, this study did find that participants had higher  
27 skin conductance and respiration rates while viewing the 'beautiful' paintings, compared to the  
28 'ugly' paintings, demonstrating that the aesthetic content of the artwork may influence their effects.  
29

30  
31 Another four studies investigated the effects of viewing nature artworks. Two studies found that  
32 self-reported stress was lower when viewing nature artworks compared to abstract artworks[10,  
33 22]. One study found that different aspects of nature might have stronger effects; a forest mural  
34 resulted in larger blood pressure decreases than an aquatic mural[23]. Nature content may also  
35 affect biological indicators of stress responses; cortisol levels decreased faster after a stressor in  
36 people viewing scrambled versions of nature artworks, compared to the original nature  
37 artworks[25].  
38

39  
40 The remaining two studies[9, 20] did not report on the content of the artwork and therefore, cannot  
41 be categorised.  
42

43  
44 **Duration of artwork viewing.** Nine studies reported the duration participants spent looking at the  
45 artwork (see Table 3). This ranged from two minutes to over 48 hours. No study investigated  
46 whether changing the duration of exposure to artworks affected stress outcomes.  
47

48  
49 **Quantity of artworks.** Most of the studies did not specify the exact number of artworks viewed. Of  
50 those studies that did specify a number, it ranged from one artwork to over 5300 in one exhibition.  
51 Half of the studies had participants view a collection of artworks as an exhibition or art programme.  
52 Only two studies showed each participant one artwork and both were in paediatric hospital  
53 rooms[10, 23]. The other experimental studies ranged from viewing four to 26 artworks in one  
54 sitting, with the exact numbers provided in Table 3.  
55

56  
57 **Viewing directives.** Five studies explicitly mentioned the viewing directives given to participants. The  
58 researchers from two experimental studies told participants to attentively look at and explore each  
59 artwork[14, 18], whereas the researcher in another study asked visitors to explore the art gallery in  
60 any way they pleased[15]. The remaining two studies asked participants to discuss and describe each

1  
2  
3 artwork to the group during art programmes[20, 24]. One of these studies[24] had a trained art  
4 educator facilitating the discussions, whereas the other[20] had a lead researcher, with no specified  
5 training.  
6

### 7 **Summary of Key Findings**

9 All but one of the studies that measured self-reported stress found a significant decrease after  
10 viewing artwork[10, 15, 21, 22], with the final study showing no significant changes[9]. A consistent  
11 decrease in systolic blood pressure was also found across the four studies measuring blood  
12 pressure[10, 17, 20, 23]. Skin conductance and skin conductance variability both increased while  
13 viewing artworks[14, 16, 19]. The results for heart rate were mostly consistent. Two of the three  
14 studies that measured heart rate found that viewing artworks decreased heart rate[19, 23]. The  
15 other study found that viewing beautiful paintings increased heart rate for students trained in fine  
16 arts and decreased heart rate for other participants[14].  
17

18 The cortisol and respiration results were less consistent. An art gallery visit decreased salivary  
19 cortisol levels[15]; however, a six week art intervention for people living with dementia increased  
20 waking cortisol levels[24]. Lastly, after a stressor, salivary cortisol decreased faster in those viewing  
21 scrambled images, compared to those viewing landscapes[25]. Viewing beautiful paintings lead to an  
22 increase in respiration rates in a healthy sample[14]. Whereas nature artworks in a hospital room  
23 decreased respiration rates in children[10]. These studies all had different samples, settings and  
24 artworks which may have accounted for these mixed findings. Lastly both alpha-amylase[25] and  
25 interleukin- 6[24] were each only measured in one study and showed no significant changes.  
26  
27

### 28 **Summary of Methodological Quality**

29 A full quality analysis is not recommended for a scoping review and many of the studies lacked  
30 sufficient methodological details. Therefore, a simple descriptive summary of key quality issues was  
31 performed as an indicator of possible quality issues. None of the studies were pre-registered.  
32 Sample sizes ranged from 27 to 826 participants; however, only two studies conducted a power  
33 analysis to determine their sample size. Krauss et al's[16] power analysis gave a required sample size  
34 of at least 68, and a final sample of 75 was recruited. The power analysis in McCabe et al[9] gave 200  
35 participants and a sample of 199 were recruited; however, only 164 were included in the analyses.  
36 The other 12 studies did not provide a power analysis. Law et al[25] was a pilot study, and was not  
37 expected to conduct a power analysis to determine sample size. Therefore, it is difficult to  
38 determine if all studies were adequately powered.  
39

40 Only nine studies had comparator groups, with only seven related to the artwork intervention. For  
41 most studies, it was difficult to blind the participants, because in most cases participants were  
42 explicitly asked to view particular artworks, and therefore both the researcher and participants were  
43 aware of which artworks they were viewing. However, two studies did successfully blind the study as  
44 both the researchers/nurses collecting the stress measures and the participants themselves were  
45 not explicitly made aware of the presence (or absence) of the artworks[23, 25]. All nine between-  
46 groups studies reported randomisation of participants to groups. However, the method of  
47 randomisation was not stated in many studies. Only four studies[9, 10, 16, 20] were RCTs.  
48  
49

### 50 **DISCUSSION**

51 This scoping review aimed to examine the existing research on the effects of viewing visual artworks  
52 on stress outcomes and identify gaps in the research. The 14 included studies demonstrate research  
53 in this area is growing, with 10 studies being published in the last 10 years. However, there is still a  
54  
55  
56  
57  
58  
59  
60

1  
2  
3 paucity of high-quality research, and the evidence that does exist has heterogeneous methodologies  
4 and interventions, creating difficulty in comparing and directly summarising the results. Despite this,  
5 the scoping review was able to gather sufficient evidence to address the research questions outlined  
6 in the introduction and identify gaps for future research, as detailed below.  
7

8  
9 Overall, the evidence supports the claim that viewing artworks can reduce stress, in particular self-  
10 reported stress and systolic blood pressure. These preliminary quantitative results support  
11 qualitative research showing that viewing artworks provides positive distraction from a hospital  
12 environment and lowers self-reported stress[9, 12, 29]. The findings indicated that digital artworks  
13 can have similar stress-reducing effects to physical artworks, thus increasing the avenues available  
14 for viewers. Artwork interventions can therefore be transposed onto computers, TVs, phones and  
15 tablets, as a portable, cheap and easy intervention for stress-reduction.  
16

17  
18 Together the results suggest that the provision of artworks could be an effective stress-reduction  
19 intervention. However, mixed findings combined with a lack of homologous methodologies means  
20 that this claim about effective stress-reduction cannot be concluded without more rigorous  
21 research. Future research needs to ensure better methodological quality including: adequate  
22 comparator groups, power analyses to ensure sufficient sample sizes, clearly defined randomisation  
23 procedures and pre-registration. If we examine the results from just the four RCTs, the evidence is  
24 even less conclusive. More detail on these studies and their findings are provided in Table 2;  
25 however, only one of the four RCTs showed significant effects for their main hypotheses. Wikström  
26 et al[20] found a significant decrease in systolic blood pressure after an art intervention. In contrast,  
27 McCabe et al[9] found no significant effects on distress measures, and Eisen et al[10] only found  
28 significant effects when subgroup analyses of age were conducted. Lastly, Krauss et al[16] did find  
29 significant decreases in physiological stress when viewing artworks compared to baseline; however,  
30 they found no significant differences between the viewing directives provided, which was their main  
31 hypothesis. Therefore, more RCTs still need to be conducted on this topic for clearer conclusions to  
32 be made.  
33  
34  
35

36  
37 The differences between the studies suggest important moderating factors, one of which is setting.  
38 The museum context may add to the effects of viewing artwork, as museum related factors may lead  
39 to greater appreciation of artwork[30]. In addition, viewing artwork in a museum usually involves  
40 walking, which has its own stress-reducing effects[31]. Laboratory studies remove some of these  
41 contextual factors and may provide more specific evidence for the effects of viewing artworks, but  
42 they have lower ecological validity. The hospital room is an important setting as patients are often  
43 confined to their room for long time-periods and rooms are often deprived of environmental  
44 enrichment. Artwork could act as visual stimulation to positively distract patients from their stress,  
45 pain and medical conditions, and therefore it is suggested that artwork is placed in hospital rooms  
46 and waiting rooms. Artwork could also have stress-reducing benefits in other settings such as  
47 waiting rooms and workplaces, which are often related to high stress. More research in these  
48 settings should be conducted.  
49  
50

51  
52 Other possible moderating factors include individual characteristics, although little research has  
53 investigated these. Gender differences were found in two of the included studies, with a trend  
54 towards females experiencing greater stress-reduction in response to nature artworks[10, 22]. One  
55 small survey found that African Americans and Caucasians have similar preferences for nature  
56 artworks[32]; however, no study has investigated whether culture affects the stress-reducing effects  
57 of artworks. Given the diversity in cultures, demographics and individual preferences for artwork, it  
58 may be over simplistic to suggest that all individuals experience artwork the same way[33].  
59  
60

1  
2  
3 The findings indicate that the content and aesthetic qualities of artwork are also important  
4 considerations. Although mixed, the studies generally indicated that nature, especially greenery,  
5 may be the most stress-reducing. This is consistent with research demonstrating that nature artwork  
6 is most preferred by adults[34] and children[10]. There are two main theories as to why viewing  
7 nature is beneficial for humans. The evolutionary theory proposes that because humans evolved in a  
8 natural environment, nature is processed more efficiently and we are predisposed to experience  
9 restoration[35]. On the other hand, the attention restoration theory posits that nature can  
10 counteract the mental fatigue caused by stress and therefore reduce cognitive strain[36]. Thus,  
11 these two theories point to nature artwork as having the greatest stress reducing effects, as  
12 demonstrated in this review. In contrast, abstract artworks can be seen as challenging, ambiguous  
13 and unclear for viewers, leading to increased stress[30, 37]. This is supported by the emotional  
14 congruence theory which posits that stressed people are likely to project their negative experiences  
15 and emotions onto ambiguous environmental surroundings, including artworks[5]. Other artwork  
16 content could be provocative and emotionally inappropriate for certain situations, eliciting anger  
17 and dislike. For example, a study by Ho and colleagues[33] found that certain provocative artworks  
18 elicited feelings of loneliness and hopelessness in viewers, suggesting artwork must be chosen  
19 carefully, with particular emphasis on the provision of nature artworks.  
20  
21  
22  
23

24 The mixed findings suggest that under some conditions, viewing artwork may be physiologically  
25 relaxing, whereas under other conditions viewing artwork may be physiologically stimulating. The  
26 direction of these effects may not only depend upon the content of the artwork, but also the context  
27 and viewers' stress levels. Regardless of the direction of effects on physiology, lower self-reported  
28 stress may result.  
29  
30

31 Although this review focussed on the stress-reducing effects of viewing artwork, it may also be  
32 important to investigate the stimulating aspects of artwork. For certain populations, such as people  
33 living with dementia, visual stimulation and enrichment through artworks could improve other  
34 aspects of health, such as cognitive function[24]. As discussed above, visual stimulation and  
35 enrichment may also be important to provide positive distraction from negative experiences. Three  
36 studies showed an increase in physiological stress[14, 24, 25]. This increased stimulation may be  
37 related to the content of the artworks ('beautiful' vs 'ugly' paintings[14], or landscapes vs scrambled  
38 images[25]) or the types of populations involved (people living with dementia[24] and art  
39 students[14]). Therefore, the provision of stimulating artworks may be appropriate for certain  
40 situations, including for people living with dementia.  
41  
42  
43

44 Choice may be another important variable. This is especially pertinent in settings where people have  
45 little control. Art Carts have been used in hospitals to allow patients to choose which artworks to  
46 view during their stay to give them a sense of control over their environment[29]. Two studies in this  
47 review[9, 20] gave participants a choice of artwork, however research is yet to investigate whether  
48 the element of choice affects stress outcomes.  
49  
50

51 Directives given to viewers may influence the way participants view artworks and therefore  
52 moderate the artworks' stress-reducing effects. Wikström[38] previously discussed the importance  
53 of creating an art-dialogue when viewing and discussing artworks in order to improve engagement,  
54 understanding and empowerment. Other research[33] demonstrated that the descriptions given to  
55 viewers about artwork could be influential, and therefore this may be an important element for  
56 studies to include. However, few studies reported the directives given. It is important for future  
57 research to report what directives were provided and investigate whether this is influential.  
58  
59  
60

1  
2  
3 Finally, it is difficult to determine the dose-response relationship of artwork viewing. There was little  
4 consistency in the number of artworks shown to each participant, and no study investigated  
5 whether the quantity of artworks or viewing durations mattered. Therefore, future research could  
6 investigate the best artwork viewing duration and number of works.  
7

### 8 **Limitations**

9  
10 This review is limited by only including articles published in the English language. Articles in other  
11 languages could have been missed. The review deviated slightly from the original protocol. Due to  
12 the large number of irrelevant articles identified using the original search strategy, the search terms  
13 were narrowed and the original title screening was only conducted by one reviewer. These  
14 deviations were required to make the search and screening more feasible. This review did not  
15 include anxiety or mood measures or studies using qualitative methodology, as these outcomes  
16 were considered outside the scope of the review.  
17  
18

### 19 **Conclusions**

20  
21 This scoping review summarised research on the effects of viewing visual artworks on stress  
22 outcomes. 14 studies met the eligibility criteria, with consistent reductions in self-reported stress,  
23 but mixed effects on physiology. This research suggests that the provision of artworks could be an  
24 effective stress-reduction intervention. However, most of the research was low quality, with many  
25 methodological details missing, and there was high heterogeneity in research methodologies.  
26 Setting, individual characteristics, artwork content, and viewing instructions may be important  
27 moderating factors. Before a systematic review is conducted, more robust research is recommended  
28 that uses standardised methods and RCTs to investigate the effects of viewing visual art on stress  
29 outcomes.  
30  
31  
32  
33  
34  
35  
36  
37  
38  
39  
40  
41  
42  
43  
44  
45  
46  
47  
48  
49  
50  
51  
52  
53  
54  
55  
56  
57  
58  
59  
60



## References

1. Boyce M, Bungay H, Munn-Giddings C, et al. The impact of the arts in healthcare on patients and service users: A critical review. *Health Soc Care Community* 2018;26(4):458-73. <https://doi.org/10.1111/hsc.12502>
2. Carswell C, Reid J, Walsh I, et al. Arts-based interventions for hospitalised patients with cancer: A systematic literature review. *British Journal of Healthcare Management* 2018;24(12):611-6. <https://doi.org/10.12968/bjhc.2018.24.12.611>
3. Van Lith T. Art therapy in mental health: A systematic review of approaches and practices. *Arts Psychother* 2016;47:9-22. <https://doi.org/10.1016/j.aip.2015.09.003>
4. Vetter D, Barth J, Uyulmaz S, et al. Effects of art on surgical patients: a systematic review and meta-analysis. *Ann Surg* 2015;262(5):704-13. <https://doi.org/10.1097/SLA.0000000000001480>
5. Hathorn K, Nanda U. A guide to evidence-based art. *The Center for Health Design* 2008:1-22.
6. Davies CR, Rosenberg M, Knuiaman M, et al. Defining arts engagement for population-based health research: Art forms, activities and level of engagement. *Arts Health* 2012;4(3):203-16. <https://doi.org/10.1080/17533015.2012.656201>
7. Spooner H. Embracing a full spectrum definition of art therapy. *Art Ther* 2016;33(3):163-6. <https://doi.org/10.1080/07421656.2016.1199249>
8. Lankston L, Cusack P, Fremantle C, et al. Visual art in hospitals: Case studies and review of the evidence. *J R Soc Med* 2010;103(12):490-9. <https://doi.org/10.1258/jrsm.2010.100256>
9. McCabe C, Roche D, Hegarty F, et al. 'Open Window': A randomized trial of the effect of new media art using a virtual window on quality of life in patients' experiencing stem cell transplantation. *Psycho-Oncology* 2013;22(2):330-7. <https://doi.org/10.1002/pon.2093>
10. Eisen SL, Ulrich RS, Shepley MM, et al. The stress-reducing effects of art in pediatric health care: Art preferences of healthy children and hospitalized children. *Journal of Child Health Care* 2008;12(3):173-90. <https://doi.org/10.1177/1367493508092507>
11. Lacey S, Hagtvedt H, Patrick VM, et al. Art for reward's sake: Visual art recruits the ventral striatum. *Neuroimage* 2011;55(1):420-33. <https://doi.org/10.1016/j.neuroimage.2010.11.027>
12. George DR, de Boer C, Green MJ. "That landscape is where I'd like to be...": Offering patients with cancer a choice of artwork *JAMA*. 2017;317(9):890-2. <https://doi.org/10.1001/jama.2017.1233>
13. Peters MDJ, Godfrey CM, Mclnerney P, et al. Chapter 11: Scoping reviews (2020 version). In: Aromataris E, Munn Z, eds. *JBI Manual for Evidence Synthesis*, JBI 2020. <https://doi.org/10.46658/JBIMES-20-12>
14. de Jong MA. A physiological approach to aesthetic preference. I. Paintings. *Psychother Psychosom* 1972;20(6):360-5. <https://doi.org/10.1159/000286439>
15. Clow A, Fredhoi C. Normalisation of salivary cortisol levels and self-report stress by a brief lunchtime visit to an art gallery by London City workers. *Journal of Holistic Healthcare* 2006;3(2):29-32.

16. Krauss L, Ott C, Opwis K, et al. Impact of contextualizing information on aesthetic experience and psychophysiological responses to art in a museum: A naturalistic randomized controlled trial. *Psychol Aesthet Creat Arts* 2019;Advanced Online Publication. <https://doi.org/10.1037/aca0000280>
17. Mastandrea S, Maricchiolo F, Carrus G, et al. Visits to figurative art museums may lower blood pressure and stress. *Arts Health* 2019;11(2):1-10. <https://doi.org/10.1080/17533015.2018.1443953>
18. Siri F, Ferroni F, Ardizzi M, et al. Behavioral and autonomic responses to real and digital reproductions of works of art. *Prog Brain Res* 2018;237:201-21. <https://doi.org/10.1016/bs.pbr.2018.03.020>
19. Tschacher W, Greenwood S, Kirchberg V, et al. Physiological correlates of aesthetic perception of artworks in a museum. *Psychol Aesthet, Creat Arts* 2012;6(1):96. <https://doi.org/10.1037/a0023845>
20. Wikström B, Theorell T, Sandström S. Medical health and emotional effects of art stimulation in old age. *Psychother Psychosom* 1993;60(3-4):195-206. <https://doi.org/10.1159/000288693>
21. Karnik M, Printz B, Finkel J. A hospital's contemporary art collection: effects on patient mood, stress, comfort, and expectations. *HERD* 2014;7(3):60-77. <https://doi.org/10.1177/193758671400700305>
22. Kweon B, Ulrich R, Walker V, et al. Anger and stress: The role of landscape posters in an office setting. *Environ Behav* 2008;40(3):355-81. <https://doi.org/10.1177/0013916506298797>
23. Pearson M, Gaines K, Pati D, et al. The physiological impact of window murals on pediatric patients. *HERD* 2019;12(2):116-29. <https://doi.org/10.1177/1937586718800483>
24. D'Cunha NM, McKune AJ, Isbel S, et al. Psychophysiological responses in people living with dementia after an art gallery intervention: An exploratory study. *J Alzheimer's Dis* 2019;72(2):549-62. <https://doi.org/10.3233/JAD-190784>
25. Law M, Minissale G, Lambert A, et al. Viewing landscapes is more stimulating than scrambled images after a stressor: A cross-disciplinary approach. *Front Psychol* 2020;10:3092. <https://doi.org/10.3389/fpsyg.2019.03092>
26. Mackay C, Cox T, Burrows G, et al. An inventory for the measurement of self-reported stress and arousal. *Br J Soc Clin Psychol* 1978;17(3):283-4. <https://doi.org/10.1111/j.2044-8260.1978.tb00280.x>
27. King MG, Burrows GD, Stanley GV. Measurement of stress and arousal: Validation of the stress/arousal adjective checklist. *Br J Psychol* 1983;74(4):473-9. <https://doi.org/10.1111/j.2044-8295.1983.tb01880.x>
28. Roth AJ, Kornblith AB, Batel-Copel L, et al. Rapid screening for psychologic distress in men with prostate carcinoma: A pilot study. *Cancer* 1998;82(10):1904-8. [https://doi.org/10.1002/\(sici\)1097-0142\(19980515\)82:10<1904::aid-cnrcr13>3.0.co;2-x](https://doi.org/10.1002/(sici)1097-0142(19980515)82:10<1904::aid-cnrcr13>3.0.co;2-x)
29. Suter E, Baylin D. Choosing art as a complement to healing. *Appl Nurs Res* 2007;20(1):32-8. <https://doi.org/10.1016/j.apnr.2005.11.004>
30. Mastandrea S. Visitor's approaches, personality traits and psycho-physiological well-being in different art style museums. *International and Interdisciplinary Conference on Digital Environments for Education, Arts and Heritage*; Springer; 2018.



- 1  
2  
3 31. Kelly P, Williamson C, Niven AG, et al. Walking on sunshine: Scoping review of the evidence for  
4 walking and mental health. *Br J Sports Med* 2018;52(12):800-6. [http://dx.doi.org/10.1136/bjsports-](http://dx.doi.org/10.1136/bjsports-2017-098827)  
5 2017-098827  
6  
7 32. Hathorn K, Ulrich R. The therapeutic art program of Northwestern Memorial Hospital. *Creating*  
8 *Environments that Heal: Proceedings of the Symposium On Healthcare Design*; 2001.  
9  
10 33. Ho RT, Potash JS, Fang F, et al. Art viewing directives in hospital settings effect on mood. *HERD*  
11 2015;8(3):30-43. <https://doi.org/10.1177/1937586715575903>  
12  
13 34. Nanda U, Eisen SL, Baladandayuthapani V. Undertaking an art survey to compare patient versus  
14 student art preferences. *Environ Behav* 2008;40(2):269-301.  
15 <https://doi.org/10.1177/0013916507311552>  
16  
17 35. Ulrich R, Simons R, Miles M. Effects of environmental simulations and television on blood donor  
18 stress. *J Archit Plann Res* 2003;20(1):38-47. <https://www.jstor.org/stable/43030641>  
19  
20 36. Kaplan S. The restorative benefits of nature: Toward an integrative framework. *J Environ Psychol*  
21 1995;15:169-82. [https://doi.org/10.1016/0272-4944\(95\)90001-2](https://doi.org/10.1016/0272-4944(95)90001-2)  
22  
23 37. Ulrich R. How design impacts wellness. *Healthc Forum J* 1992;35(5):20-5.  
24  
25 38. Wikström B. The dynamics of visual art dialogues: Experiences to be used in hospital settings  
26 with visual art enrichment. *Nurs Res Practi* 2011;2011:204594.  
27 <https://doi.org/10.1155/2011/204594>  
28  
29  
30  
31  
32  
33  
34  
35

36 **Authors' contributions:** ML and EB conceptualised the project and designed the scoping review  
37 protocol. ML performed the search strategy. ML and NK performed the study screening and data  
38 extraction. ML wrote the manuscript. EB and NK edited the manuscript. All authors approved the  
39 final manuscript. ML made the revisions to the manuscript.  
40

41 **Funding statement:** This research received no specific grant from any funding agency in the public,  
42 commercial or not-for-profit sectors.  
43

44 **Competing interests:** None  
45

46 **Data availability statement:** Data sharing not applicable as no datasets generated and/or analysed  
47 for this study  
48

49 **Ethics Approval:** Not applicable  
50  
51  
52  
53  
54  
55  
56  
57  
58  
59  
60

**Figure 1.** PRISMA-ScR flow diagram of the study selection process

For peer review only

1  
2  
3  
4  
5  
6  
7  
8  
9  
10  
11  
12  
13  
14  
15  
16  
17  
18  
19  
20  
21  
22  
23  
24  
25  
26  
27  
28  
29  
30  
31  
32  
33  
34  
35  
36  
37  
38  
39  
40  
41  
42  
43  
44  
45  
46  
47  
48  
49  
50  
51  
52  
53  
54  
55  
56  
57  
58  
59  
60

Table 1

*Example search strategy syntax for databases*

| Database                          | Search Strategy Syntax                                                                                                                                                                                                                                                                                                                                                                                                                                                                           |
|-----------------------------------|--------------------------------------------------------------------------------------------------------------------------------------------------------------------------------------------------------------------------------------------------------------------------------------------------------------------------------------------------------------------------------------------------------------------------------------------------------------------------------------------------|
| Scopus                            | ( TITLE-ABS-KEY ( artwork OR "art work" OR "visual art" OR "art museum" OR painting OR mural OR "works of art" OR "viewing art" OR "viewing artwork" OR "artwork viewing" OR "art gallery" OR "art galleries" ) AND TITLE-ABS-KEY ( stress OR "blood pressure" OR anxiety OR "heart rate" OR mood OR norepinephrine OR epinephrine OR "stress hormones" OR stressor OR glucocorticoids OR cortisol OR alpha-amylase OR "stress reduction" ) ) AND ( LIMIT TO ( LANGUAGE , "English" ) )          |
| ProQuest Dissertations and Thesis | ab(artwork OR "art work" OR "visual art" OR "art museum" OR painting OR mural OR "works of art" OR museum OR "viewing art" OR "artistic work" OR "viewing artwork" OR "artwork viewing" OR "art gallery" OR "art galleries") AND ab(stress OR "blood pressure" OR anxiety OR respiration OR "heart rate" OR mood OR norepinephrine OR epinephrine OR "stress hormones" OR "mental health" OR stressor OR glucocorticoids OR cortisol OR alpha-amylase OR "immune marker" OR "stress reduction" ) |

Table 2

Summaries of the studies' designs and key stress outcome findings

| Study                     | Study Design and Methods                                                                                                                                                                                                                                                                                                                                                                                                               | Key Findings                                                                                                                                                                                                                                                                                                                                                                                                        |
|---------------------------|----------------------------------------------------------------------------------------------------------------------------------------------------------------------------------------------------------------------------------------------------------------------------------------------------------------------------------------------------------------------------------------------------------------------------------------|---------------------------------------------------------------------------------------------------------------------------------------------------------------------------------------------------------------------------------------------------------------------------------------------------------------------------------------------------------------------------------------------------------------------|
| Clow & Fredhoi (2006)[15] | Studied self-reported stress and arousal, and salivary cortisol levels in a group of London city workers during a lunchtime visit to an art gallery. Measurements were taken before and after the 35-40-minute gallery visit to explore pre-post intervention changes.                                                                                                                                                                 | Self-reported stress and salivary cortisol levels both decreased over the intervention. There were no differences in arousal levels.                                                                                                                                                                                                                                                                                |
| D'Cunha et al (2019)[24]  | Evaluated the psychophysiological effects of attending the National Art Gallery of Australia Art and Dementia programme. People living with dementia attended the group-based, six-week programme which involved viewing and discussing artworks, led by an art director. Measures of salivary cortisol and interleukin-6 were taken at baseline, at the end of the programme and 12 weeks later.                                      | Waking salivary cortisol levels increased from baseline to post-intervention, but decreased at follow-up. No changes in evening cortisol or interleukin-6 were observed. The ratio of waking to evening cortisol increased from baseline to post-intervention indicating a more dynamic diurnal cortisol rhythm.                                                                                                    |
| de Jong (1972)[14]        | Three groups of participants (advanced art history students, advanced fine art students and laboratory workers as controls) viewed projections of 12 paintings considered to be 'beautiful' and 12 paintings considered to be 'ugly' in a random order while their heart rate, respiration rate and skin conductance was measured continuously.                                                                                        | The fine arts and art history students showed a greater change in skin conductance than the laboratory workers. Respiration and skin conductance were higher during the 'beautiful' paintings than the 'ugly' paintings in all groups. The fine arts students had faster heart rate during the 'beautiful' paintings compared to the 'ugly' paintings, however, for the other two groups, this result was reversed. |
| Eisen et al (2008)[10]    | The third phase this study investigated which type of art was most effective in reducing stress in paediatric patients. On arrival to the hospital, patients were randomly allocated to one of three rooms; a room with a nature artwork, a room with an abstract artwork or a room with no artwork. Self-reported stress, blood pressure and respiratory rate were taken at baseline and after two hours of exposure to the artworks. | Overall, there were no significant differences between the groups on stress, blood pressure or respiration. However, sub-analyses showed that significantly more males than females in the 8-10 age group were positively affected by the nature artwork, as demonstrated by decreased self-reported stress, blood pressure and respiratory rates.                                                                  |
| Karnik et al (2014)[21]   | Installed a diverse collection of artworks in the public spaces and clinic rooms of a hospital. Patients were retrospectively contacted with a survey which included evaluating whether the art installations changed their self-reported stress levels.                                                                                                                                                                               | 61% of the patients that reported seeing the artworks stated that the artworks somewhat or significantly reduced their stress levels.                                                                                                                                                                                                                                                                               |

|    |                      |                                                                           |                                                                        |
|----|----------------------|---------------------------------------------------------------------------|------------------------------------------------------------------------|
| 1  |                      |                                                                           |                                                                        |
| 2  |                      |                                                                           |                                                                        |
| 3  | Krauss et al         | Participants viewed six Flemish expressionism artworks in an art          | There were no significant differences in heart rate, heart rate        |
| 4  | (2019)[16]           | museum, while heart rate and skin conductance were continuously           | variability or skin conductance between the two groups. However, in    |
| 5  |                      | measured. Participants were randomly assigned to either receive           | both groups heart rate was lower, and skin conductance and heart       |
| 6  |                      | descriptive information about the artworks (described the artwork in a    | rate variability higher when viewing the artworks, compared to         |
| 7  |                      | declarative way) or elaborative information about the artworks            | baseline.                                                              |
| 8  |                      | (described the context and deeper meaning behind the artworks).           |                                                                        |
| 9  |                      |                                                                           |                                                                        |
| 10 | Kweon et al          | Conducted an experiment investigating the effects of artwork posters on   | Males had the highest stress levels in the office with no posters, and |
| 11 | (2008)[22]           | stress and anger levels in an office setting. Students were asked to      | the lowest stress levels in the office with mixed art posters. On the  |
| 12 |                      | complete a series of stress and anger provoking computer tasks in one of  | other hand, females had the highest stress in the office with all      |
| 13 |                      | four different mock office conditions; an office with nature posters,     | abstract posters and the lowest levels in the office with all nature   |
| 14 |                      | abstract posters, both nature and abstract posters or no posters. Levels  | posters. However, these results were only significant for males and    |
| 15 |                      | of self-reported stress were measured across the experiment.              | not females.                                                           |
| 16 |                      |                                                                           |                                                                        |
| 17 | Law et al (2020)[25] | Conducted a pilot study to investigate whether nature artworks could      | Salivary cortisol levels decreased more rapidly while viewing the      |
| 18 |                      | improve recovery from a laboratory stressor. Participants were            | scrambled images compared to the landscape artworks. There were        |
| 19 |                      | randomised to either view a 30-minute digital slideshow of landscape      | no changes in alpha-amylase across the experiment or between           |
| 20 |                      | artworks or digitally scrambled versions of these artworks after being    | groups.                                                                |
| 21 |                      | exposed to a laboratory stressor. Saliva samples were taken at baseline,  |                                                                        |
| 22 |                      | after the stressor, during the art viewing and after the art viewing to   |                                                                        |
| 23 |                      | measure cortisol and alpha-amylase.                                       |                                                                        |
| 24 | Mastandrea et al     | Students visited an art museum and were randomly assigned to visit one    | Systolic blood pressure decreased in all groups; however, this         |
| 25 | (2019)[17]           | of three art exhibitions for five minutes; a figurative art exhibition, a | decrease was only significant in the figurative art group. Heart rate  |
| 26 |                      | modern art exhibition or a museum office as a control condition. Blood    | also decreased in all three groups, however, there was no significant  |
| 27 |                      | pressure and heart rate were measured before and after the visit.         | differences between groups.                                            |
| 28 |                      |                                                                           |                                                                        |
| 29 | McCabe et al         | Evaluated the effects of the Open Window art intervention on stem-cell    | Results demonstrated no significant differences in levels of distress  |
| 30 | (2013)[9]            | transplantation patients. The Open Window is a virtual window which is    | between the two groups at any of the time-points.                      |
| 31 |                      | installed in a hospital room, where the patients can switch through nine  |                                                                        |
| 32 |                      | art channels with different artworks. Patients were randomised to either  |                                                                        |
| 33 |                      | a room with the Open Window or not. Self-reported distress was            |                                                                        |
| 34 |                      | measured at admission, the day before transplant, seven days after        |                                                                        |
| 35 |                      | transplant, prior to discharge, and 60 days, 100 days and six months      |                                                                        |
| 36 |                      | post-transplant.                                                          |                                                                        |
| 37 | Pearson et al        | Examined the impact of nature-themed window murals on physiological       | Those patients with the window murals had significant improvements     |
| 38 | (2019)[23]           | measures in paediatric patients. Paediatric patients were assigned to     | in heart rate and systolic blood pressure, with the tree-themed mural  |
| 39 |                      | hospital rooms with either a fish-themed window mural, a tree-themed      | having the greatest effect.                                            |
| 40 |                      |                                                                           |                                                                        |
| 41 |                      |                                                                           |                                                                        |
| 42 |                      |                                                                           |                                                                        |
| 43 |                      |                                                                           |                                                                        |
| 44 |                      |                                                                           |                                                                        |
| 45 |                      |                                                                           |                                                                        |
| 46 |                      |                                                                           |                                                                        |

1  
2  
3  
4  
5  
6  
7  
8  
9  
10  
11  
12  
13  
14  
15  
16  
17  
18  
19  
20  
21  
22  
23  
24  
25  
26  
27  
28  
29  
30  
31  
32  
33  
34  
35  
36  
37  
38  
39  
40  
41  
42  
43  
44  
45  
46

window mural or no window mural. Patients' blood pressure and heart rate were taken retrospectively from the patients' medical records.

Siri et al (2018)[18]

Examined the effects of viewing original physical artworks and their digital reproductions within a museum context. Cardiovascular variables were measured via ECG continuously in healthy volunteers while viewing two real abstract paintings and their digital reproductions.

Results showed that there was a significant difference in heart rate between viewing the two real paintings, but no difference was found between the digital reproductions, or between the real and digital reproductions. No differences in heart rate variability were found.

Tschacher et al (2012)[19]

Monitored the physiology of visitors to an art museum using an electronic sensor glove which recorded physiological data and locomotion activity while they viewed the artworks. Afterwards, they were asked to rate the aesthetic qualities of some of the artworks.

Heart rate variability increased while viewing artworks that were deemed beautiful, high quality and surprising/humorous. Skin conductance variability increased, and heart rate decreased while viewing more dominant artworks (artworks experienced as dominant and stimulating by the viewers).

Wikström et al (1993)[20]

Investigated whether visual stimulation could improve the health of elderly women living alone. The women were randomised to either an intervention or control group. The intervention group were shown a selection of pictures, including artworks, and asked to discuss them, whereas the control group discussed current events. Blood pressure was measured at baseline, immediately after the intervention and four months later.

The intervention group had significantly lower systolic blood pressure than the control group after the intervention and at follow-up

Table 3

Overview of studies included in the review

| Study                     | Country        | Study Design                                               | Comparator Group                      | Setting                                 | Population (N)                                                                             | Stress Outcome Measures                                                  | Type and Content of Artwork                                                                                                                                        | Quantity of Artworks Viewed by Each Participant | Duration of Artwork Viewing                                     |
|---------------------------|----------------|------------------------------------------------------------|---------------------------------------|-----------------------------------------|--------------------------------------------------------------------------------------------|--------------------------------------------------------------------------|--------------------------------------------------------------------------------------------------------------------------------------------------------------------|-------------------------------------------------|-----------------------------------------------------------------|
| Clow & Fredhoi (2006)[15] | United Kingdom | Pre- and post-test, within groups quasi-experimental study | None                                  | Art gallery                             | Office workers<br>N=28 (25 included in the analysis)                                       | Self-reported stress<br>Self-reported arousal<br>Salivary cortisol       | Physical artworks in a gallery- exact content not specified                                                                                                        | Not specified- gallery exhibition               | 35-40 minutes in the gallery                                    |
| D'Cunha et al (2019)[24]  | Australia      | Pre- and post-test, within groups quasi-experimental study | None                                  | Art gallery                             | People living with dementia<br>N=28 (22 included in the analysis)                          | Salivary cortisol<br>interleukin-6                                       | Physical artworks in a gallery- exact content not specified                                                                                                        | 3-4 artworks each session, over 5-6 sessions    | 5-6x 90-minute sessions. Each artwork was viewed for 20 minutes |
| de Jong (1972)[14]        | Netherlands    | Between groups experimental study                          | Laboratory workers (non-art students) | Laboratory                              | Advanced art history students, advanced fine arts students and laboratory workers<br>N= 27 | Heart rate<br>Skin conductance<br>Respiration rate                       | Digital projections of 12 paintings considered 'beautiful' and 12 paintings considered 'ugly'                                                                      | 24                                              | Each painting was viewed for 10 seconds                         |
| Eisen et al (2008)[10]    | USA            | Pre- and post-test, randomised controlled trial            | Room with no artwork                  | Hospital-patients' room                 | Paediatric patients (aged 5-17)<br>N=78                                                    | Self-reported stress<br>Heart rate<br>Blood pressure<br>Respiratory rate | One group had a representational nature artwork hung on the wall, whereas the other group had an abstract artwork hung on the wall                                 | 1                                               | 2 hours                                                         |
| Karnik et al (2014)[21]   | USA            | Cross-sectional survey                                     | None                                  | Hospital-public spaces and clinic rooms | Hospital patients<br>N= 826                                                                | Self-reported change in stress                                           | Physical collection of abstract and representational imagery (including nature imagery). Includes an assortment of artistic media; and a variety of subject matter | Collection of over 5300 artworks                | N/A                                                             |
| Krauss et al (2019)[16]   | Switzerland    | Randomised controlled trial                                | Group received only descriptive       | Art museum                              | General public aged between 18 and 35<br>N= 75                                             | Heart rate<br>Heart rate variability                                     | Physical abstract paintings of Flemish expressionism                                                                                                               | 6                                               | Not specified                                                   |

1  
2  
3  
4  
5  
6  
7  
8  
9  
10  
11  
12  
13  
14  
15  
16  
17  
18  
19  
20  
21  
22  
23  
24  
25  
26  
27  
28  
29  
30  
31  
32  
33  
34  
35  
36  
37  
38  
39  
40  
41  
42  
43  
44  
45  
46

information about the artwork (compared to elaborative information)

Skin conductance

|                             |             |                                                             |                                |                                        |                                                                          |                                                          |                                                                                                                                                                         |                                                                     |                                                                     |
|-----------------------------|-------------|-------------------------------------------------------------|--------------------------------|----------------------------------------|--------------------------------------------------------------------------|----------------------------------------------------------|-------------------------------------------------------------------------------------------------------------------------------------------------------------------------|---------------------------------------------------------------------|---------------------------------------------------------------------|
| Kweon et al (2008)[22]      | USA         | Between groups experimental study                           | No artwork posters group       | Laboratory (replicated office setting) | Psychology students N=210                                                | Self-reported stress                                     | Nature posters and abstract posters                                                                                                                                     | 4                                                                   | Not specified                                                       |
| Law et al (2020)[25]        | New Zealand | Between groups experimental pilot study                     | Scrambled artwork images       | Laboratory                             | General public N=30                                                      | Salivary cortisol<br>Salivary alpha-amylase              | Digital slideshow of either landscape paintings or digitally scrambled versions of these paintings                                                                      | 26                                                                  | 30 minutes                                                          |
| Mastandrea et al (2019)[17] | Italy       | Between groups experimental study                           | Museum office                  | Art museum                             | Undergraduate students N=77                                              | Blood pressure<br>Heart rate                             | Physical artworks in a gallery- including figurative artworks (e.g. landscapes and portraits) and modern artworks (e.g. abstract, impressionist and informal paintings) | Not specified- gallery exhibition                                   | 5 minutes                                                           |
| McCabe et al (2013)[9]      | Ireland     | Randomised prospective clinical trial                       | Room without the 'Open Window' | Hospital-patients' room                | Stem cell transplantation patients N= 199 (164 included in the analysis) | Self-reported distress                                   | Virtual window, with artwork projections. Artwork collections ranged from visually complex abstract images to images of nature.                                         | Not specified- 9 art 'channels,' each with a collection of artworks | For the duration of their hospital stay- times not specified        |
| Pearson et al (2019)[23]    | USA         | Pre- and post-test, between groups quasi-experimental study | Room without a window mural    | Hospital-patients' room                | Paediatric patients aged 2-18) N=90                                      | Heart rate<br>Systolic blood pressure                    | Window mural- either aquatic or forest themed                                                                                                                           | 1                                                                   | Minimum of 48 hours                                                 |
| Siri et al (2018)[18]       | Italy       | Within groups experimental study                            | None                           | Art museum                             | General public N=60                                                      | Heart rate<br>Heart rate variability                     | 2 real abstract contemporary paintings and their digitally produced replicates                                                                                          | 4                                                                   | 144 seconds per artwork                                             |
| Tschacher et al (2012)[19]  | Switzerland | Within groups quasi-experimental study                      | None                           | Art museum                             | Museum visitors N=517 (373 included in the analysis)                     | Skin conductance<br>Heart rate<br>Heart rate variability | Physical modern and contemporary art exhibition                                                                                                                         | 76                                                                  | No specific timeframe given to participants. On average, they spent |



28 minutes at the gallery.

|                           |        |                                                |                                    |                          |                         |                         |                                                                                                                                                |                                                |               |
|---------------------------|--------|------------------------------------------------|------------------------------------|--------------------------|-------------------------|-------------------------|------------------------------------------------------------------------------------------------------------------------------------------------|------------------------------------------------|---------------|
| Wikström et al (1993)[20] | Sweden | Pre- and post-test randomised controlled trial | Group that were not shown artworks | Senior citizen apartment | Women aged over 70 N=40 | Systolic blood pressure | Physical pictures- ranging from artworks of nature, flowers and people, abstract patterns, white figures on black backgrounds and photographs. | Not specified how many each participant viewed | Not specified |
|---------------------------|--------|------------------------------------------------|------------------------------------|--------------------------|-------------------------|-------------------------|------------------------------------------------------------------------------------------------------------------------------------------------|------------------------------------------------|---------------|

For peer review only

1  
2  
3  
4  
5  
6  
7  
8  
9  
10  
11  
12  
13  
14  
15  
16  
17  
18  
19  
20  
21  
22  
23  
24  
25  
26  
27  
28  
29  
30  
31  
32  
33  
34  
35  
36  
37  
38  
39  
40  
41  
42  
43  
44  
45  
46

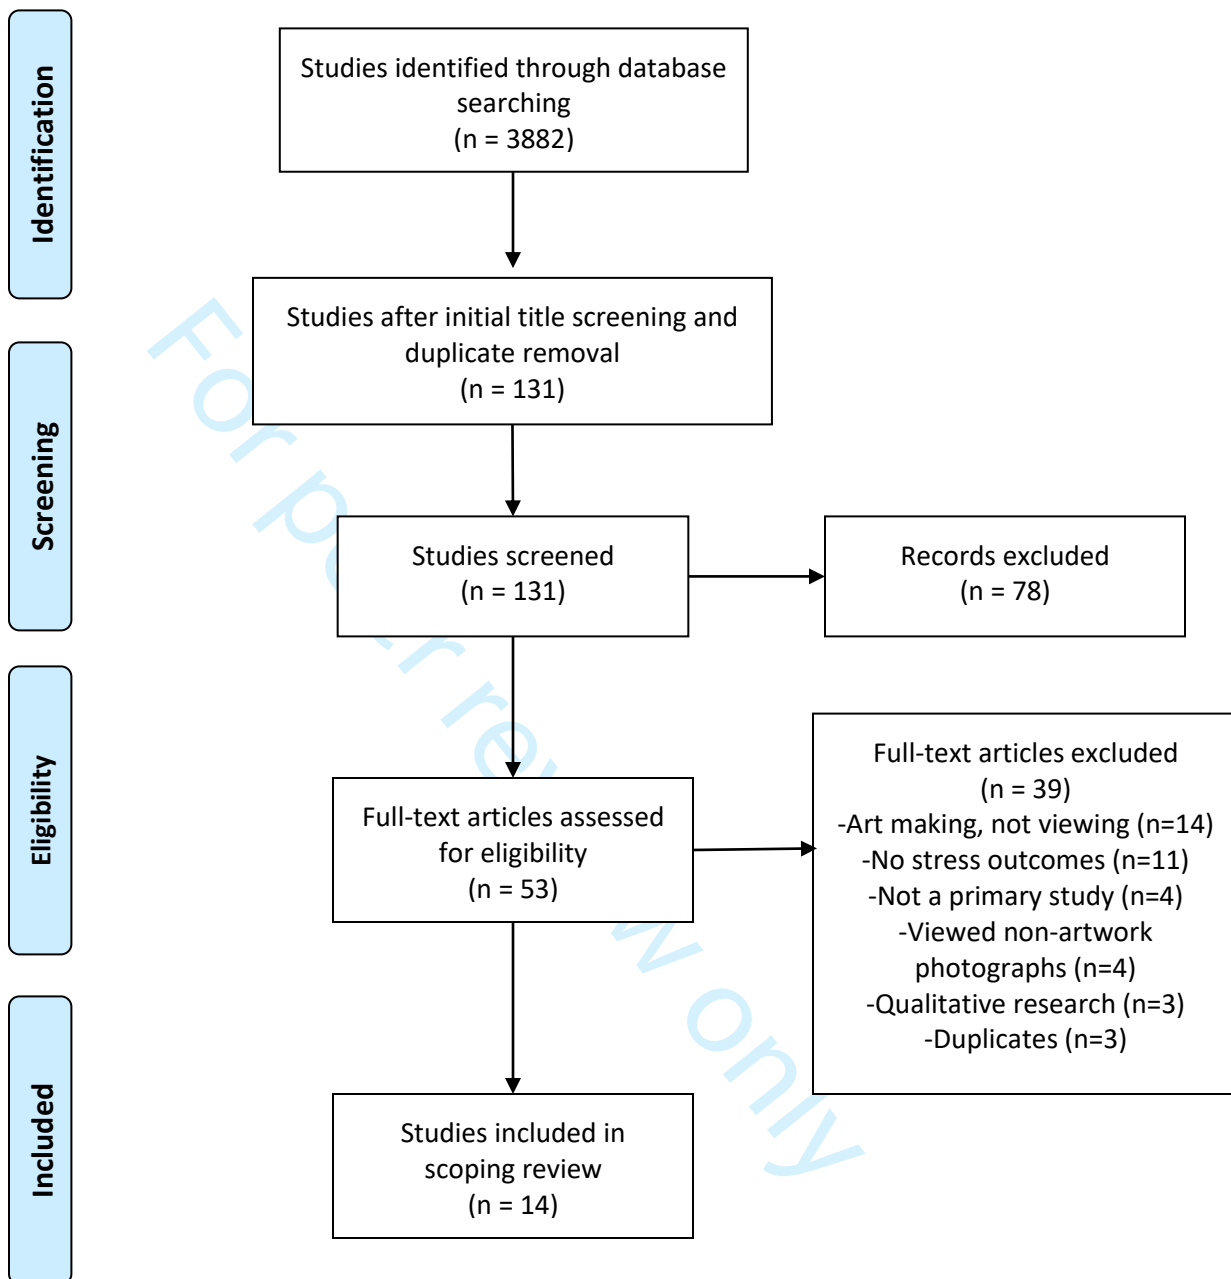

## Preferred Reporting Items for Systematic reviews and Meta-Analyses extension for Scoping Reviews (PRISMA-ScR) Checklist

| SECTION                                               | ITEM | PRISMA-ScR CHECKLIST ITEM                                                                                                                                                                                                                                                                                  | REPORTED ON PAGE # |
|-------------------------------------------------------|------|------------------------------------------------------------------------------------------------------------------------------------------------------------------------------------------------------------------------------------------------------------------------------------------------------------|--------------------|
| <b>TITLE</b>                                          |      |                                                                                                                                                                                                                                                                                                            |                    |
| Title                                                 | 1    | Identify the report as a scoping review.                                                                                                                                                                                                                                                                   |                    |
| <b>ABSTRACT</b>                                       |      |                                                                                                                                                                                                                                                                                                            |                    |
| Structured summary                                    | 2    | Provide a structured summary that includes (as applicable): background, objectives, eligibility criteria, sources of evidence, charting methods, results, and conclusions that relate to the review questions and objectives.                                                                              |                    |
| <b>INTRODUCTION</b>                                   |      |                                                                                                                                                                                                                                                                                                            |                    |
| Rationale                                             | 3    | Describe the rationale for the review in the context of what is already known. Explain why the review questions/objectives lend themselves to a scoping review approach.                                                                                                                                   |                    |
| Objectives                                            | 4    | Provide an explicit statement of the questions and objectives being addressed with reference to their key elements (e.g., population or participants, concepts, and context) or other relevant key elements used to conceptualize the review questions and/or objectives.                                  |                    |
| <b>METHODS</b>                                        |      |                                                                                                                                                                                                                                                                                                            |                    |
| Protocol and registration                             | 5    | Indicate whether a review protocol exists; state if and where it can be accessed (e.g., a Web address); and if available, provide registration information, including the registration number.                                                                                                             |                    |
| Eligibility criteria                                  | 6    | Specify characteristics of the sources of evidence used as eligibility criteria (e.g., years considered, language, and publication status), and provide a rationale.                                                                                                                                       |                    |
| Information sources*                                  | 7    | Describe all information sources in the search (e.g., databases with dates of coverage and contact with authors to identify additional sources), as well as the date the most recent search was executed.                                                                                                  |                    |
| Search                                                | 8    | Present the full electronic search strategy for at least 1 database, including any limits used, such that it could be repeated.                                                                                                                                                                            |                    |
| Selection of sources of evidence†                     | 9    | State the process for selecting sources of evidence (i.e., screening and eligibility) included in the scoping review.                                                                                                                                                                                      |                    |
| Data charting process‡                                | 10   | Describe the methods of charting data from the included sources of evidence (e.g., calibrated forms or forms that have been tested by the team before their use, and whether data charting was done independently or in duplicate) and any processes for obtaining and confirming data from investigators. |                    |
| Data items                                            | 11   | List and define all variables for which data were sought and any assumptions and simplifications made.                                                                                                                                                                                                     |                    |
| Critical appraisal of individual sources of evidence§ | 12   | If done, provide a rationale for conducting a critical appraisal of included sources of evidence; describe the methods used and how this information was used in any data synthesis (if appropriate).                                                                                                      |                    |
| Synthesis of results                                  | 13   | Describe the methods of handling and summarizing the data that were charted.                                                                                                                                                                                                                               |                    |



| SECTION                                       | ITEM | PRISMA-ScR CHECKLIST ITEM                                                                                                                                                                       | REPORTED ON PAGE # |
|-----------------------------------------------|------|-------------------------------------------------------------------------------------------------------------------------------------------------------------------------------------------------|--------------------|
| <b>RESULTS</b>                                |      |                                                                                                                                                                                                 |                    |
| Selection of sources of evidence              | 14   | Give numbers of sources of evidence screened, assessed for eligibility, and included in the review, with reasons for exclusions at each stage, ideally using a flow diagram.                    |                    |
| Characteristics of sources of evidence        | 15   | For each source of evidence, present characteristics for which data were charted and provide the citations.                                                                                     |                    |
| Critical appraisal within sources of evidence | 16   | If done, present data on critical appraisal of included sources of evidence (see item 12).                                                                                                      |                    |
| Results of individual sources of evidence     | 17   | For each included source of evidence, present the relevant data that were charted that relate to the review questions and objectives.                                                           |                    |
| Synthesis of results                          | 18   | Summarize and/or present the charting results as they relate to the review questions and objectives.                                                                                            |                    |
| <b>DISCUSSION</b>                             |      |                                                                                                                                                                                                 |                    |
| Summary of evidence                           | 19   | Summarize the main results (including an overview of concepts, themes, and types of evidence available), link to the review questions and objectives, and consider the relevance to key groups. |                    |
| Limitations                                   | 20   | Discuss the limitations of the scoping review process.                                                                                                                                          |                    |
| Conclusions                                   | 21   | Provide a general interpretation of the results with respect to the review questions and objectives, as well as potential implications and/or next steps.                                       |                    |
| <b>FUNDING</b>                                |      |                                                                                                                                                                                                 |                    |
| Funding                                       | 22   | Describe sources of funding for the included sources of evidence, as well as sources of funding for the scoping review. Describe the role of the funders of the scoping review.                 |                    |

JBI = Joanna Briggs Institute; PRISMA-ScR = Preferred Reporting Items for Systematic reviews and Meta-Analyses extension for Scoping Reviews.

\* Where *sources of evidence* (see second footnote) are compiled from, such as bibliographic databases, social media platforms, and Web sites.

† A more inclusive/heterogeneous term used to account for the different types of evidence or data sources (e.g., quantitative and/or qualitative research, expert opinion, and policy documents) that may be eligible in a scoping review as opposed to only studies. This is not to be confused with *information sources* (see first footnote).

‡ The frameworks by Arksey and O'Malley (6) and Levac and colleagues (7) and the JBI guidance (4, 5) refer to the process of data extraction in a scoping review as data charting.

§ The process of systematically examining research evidence to assess its validity, results, and relevance before using it to inform a decision. This term is used for items 12 and 19 instead of "risk of bias" (which is more applicable to systematic reviews of interventions) to include and acknowledge the various sources of evidence that may be used in a scoping review (e.g., quantitative and/or qualitative research, expert opinion, and policy document).

From: Tricco AC, Lillie E, Zarin W, O'Brien KK, Colquhoun H, Levac D, et al. PRISMA Extension for Scoping Reviews (PRISMA-ScR): Checklist and Explanation. *Ann Intern Med.* ;169:467–473. doi: 10.7326/M18-0850



# BMJ Open

## Evidence for the effects of Viewing Visual Artworks on Stress Outcomes: A Scoping Review

|                                 |                                                                                                                                                                                       |
|---------------------------------|---------------------------------------------------------------------------------------------------------------------------------------------------------------------------------------|
| Journal:                        | <i>BMJ Open</i>                                                                                                                                                                       |
| Manuscript ID                   | bmjopen-2020-043549.R3                                                                                                                                                                |
| Article Type:                   | Original research                                                                                                                                                                     |
| Date Submitted by the Author:   | 01-Jun-2021                                                                                                                                                                           |
| Complete List of Authors:       | Law, Mikaela; The University of Auckland, Psychological Medicine<br>Karulkar, Nikita; The University of Auckland, Psychological Medicine<br>Broadbent, E; The University of Auckland, |
| <b>Primary Subject Heading</b>: | Complementary medicine                                                                                                                                                                |
| Secondary Subject Heading:      | Medical management, Mental health, Research methods                                                                                                                                   |
| Keywords:                       | COMPLEMENTARY MEDICINE, MENTAL HEALTH, PSYCHIATRY, SOCIAL MEDICINE                                                                                                                    |
|                                 |                                                                                                                                                                                       |

SCHOLARONE™  
Manuscripts



I, the Submitting Author has the right to grant and does grant on behalf of all authors of the Work (as defined in the below author licence), an exclusive licence and/or a non-exclusive licence for contributions from authors who are: i) UK Crown employees; ii) where BMJ has agreed a CC-BY licence shall apply, and/or iii) in accordance with the terms applicable for US Federal Government officers or employees acting as part of their official duties; on a worldwide, perpetual, irrevocable, royalty-free basis to BMJ Publishing Group Ltd ("BMJ") its licensees and where the relevant Journal is co-owned by BMJ to the co-owners of the Journal, to publish the Work in this journal and any other BMJ products and to exploit all rights, as set out in our [licence](#).

The Submitting Author accepts and understands that any supply made under these terms is made by BMJ to the Submitting Author unless you are acting as an employee on behalf of your employer or a postgraduate student of an affiliated institution which is paying any applicable article publishing charge ("APC") for Open Access articles. Where the Submitting Author wishes to make the Work available on an Open Access basis (and intends to pay the relevant APC), the terms of reuse of such Open Access shall be governed by a Creative Commons licence – details of these licences and which [Creative Commons](#) licence will apply to this Work are set out in our licence referred to above.

Other than as permitted in any relevant BMJ Author's Self Archiving Policies, I confirm this Work has not been accepted for publication elsewhere, is not being considered for publication elsewhere and does not duplicate material already published. I confirm all authors consent to publication of this Work and authorise the granting of this licence.

1  
2  
3 **Evidence for the effects of Viewing Visual Artworks on Stress Outcomes: A Scoping Review**  
4  
5  
6  
7

8  
9 Mikaela Law (MHLthPsysc), Nikita Karulkar (BSc) & Elizabeth Broadbent (PhD)  
10  
11  
12

13  
14  
15 All authors are affiliated with the Department of Psychological Medicine, The University of  
16 Auckland, Private Bag 92019, Auckland 1142, New Zealand  
17  
18  
19  
20  
21  
22  
23  
24

25 **Corresponding author:**

26 Elizabeth Broadbent

27 [e.broadbent@auckland.ac.nz](mailto:e.broadbent@auckland.ac.nz)

28 The University of Auckland

29 Building 507,

30 28 Park Avenue, Grafton, 1023

31 Auckland, New Zealand

32 [+64 9 923 6756](tel:+6499236756)  
33  
34  
35  
36  
37  
38  
39  
40  
41  
42  
43  
44  
45  
46  
47  
48  
49  
50  
51  
52  
53  
54  
55  
56  
57  
58  
59  
60

## **Abstract**

**Objective:** To review the existing evidence on the effects of viewing visual artworks on stress outcomes and outline any gaps in the research.

**Design:** A scoping review was conducted based on the Joanna Briggs Institute methodology for scoping reviews and using the preferred reporting items for systematic reviews and meta-analyses extension for scoping reviews. Two independent reviewers performed the screening and data extraction.

**Data Sources:** Medline, Embase, APA PsycINFO, Cochrane CENTRAL, Scopus, Google Scholar, Google, ProQuest Theses and Dissertations Database, APA PsycExtra and Opengrey.eu were searched in May 2020.

**Eligibility Criteria:** Studies were included if they investigated the effects of viewing at least one visual artwork on at least one stress outcome measure. Studies involving active engagement with art, review papers or qualitative studies were excluded. There were no limits in terms of year of publication, contexts or population types; however, only studies published in the English language were considered.

**Data Extraction and Synthesis:** Information extracted from manuscripts included: study methodologies, population and setting characteristics, details of the artwork interventions and key findings.

**Results:** 14 primary studies were identified, with heterogeneous study designs, methodologies and artwork interventions. Many studies lacked important methodological details and only four studies were randomised controlled trials. 13 of the 14 studies on self-reported stress reported reductions after viewing artworks, and all of the four studies that examined systolic blood pressure reported reductions. Fewer studies examined heart rate, heart rate variability, cortisol, respiration or other physiological outcomes.

**Conclusions:** There is promising evidence for effects of viewing artwork on reducing stress. Moderating factors may include setting, individual characteristics, artwork content, and viewing instructions. More robust research, using more standardised methods and randomised controlled trial designs, is needed.

**Registration Details:** A protocol for this review is registered with the Open Science Framework ([osf.io/gq5d8](https://osf.io/gq5d8)).



### Strengths and Limitations of this Study

- A comprehensive scoping review was conducted using a broad and inclusive search strategy and a large variety of databases were searched.
- The reviewers independently followed a structured and pre-published protocol for searching, screening and extracting data which followed the Joanna Briggs Institute methodology for scoping reviews and PRISMA-ScR guidelines.
- Only studies published in the English language were included, possibly resulting in articles of other languages being missed.
- Slight deviations in the original protocol were performed in order to make the data screening more feasible.

For peer review only

## INTRODUCTION

A number of studies and reviews have suggested that participation in the arts is beneficial for health[1-4]. Because of this, many healthcare and workplace settings offer art programmes, including art therapy, music and visual art displays, to reduce stress and improve wellbeing for staff, patients and customers[5]. However, there is little evidence that these programmes have the desired effects and there is a need for a high-quality evidence base for art-based interventions[1, 4].

Engagement with arts can be divided into active and passive participation. Active participation involves making, creating or teaching arts[2, 6]. This includes art therapy (where an art therapist directs the creation of artworks to achieve a particular goal and foster improved mental health and wellbeing), as well as other arts-based interventions that are not goal-driven and do not require a trained professional[7]. In contrast passive participation involves behaviours such as observing, viewing, listening and watching art[2, 6]. Passive viewing of artworks has the advantages of being an easy, low-cost and non-invasive intervention. This scoping review focussed on the effects of passively viewing visual artworks and therefore excluded research pertaining to the active participation in arts.

There is some evidence that viewing artworks as an intervention is beneficial; however, this evidence is not of uniformly high quality, is rarely critical, and is sparse, with many important theoretical and evidential gaps. As well as this, most of the evidence comes from anecdotes, descriptions and personal experiences, rather than empirical research[8, 9]. Although many settings have been used within this research, including healthcare, art museums and laboratories, there is a paucity of evidence to demonstrate whether these settings affect outcomes differently. Demographics may be important moderators as ethnicity, gender and age may influence preferences for certain types of artworks. However, rigorous research has yet to be conducted examining the influence of settings and populations.

Due to these limitations, it is important to review the existing evidence and identify any research gaps that need to be addressed. As the evidence base is small and heterogeneous, a systematic review could not be accurately completed and would be too restrictive, so instead a scoping review was conducted. The results can be used to direct future research to fill these gaps before a full systematic review can be completed.

There is no universally accepted definition of artworks as this construct has been inconsistent and debated. For the purpose of this review, artwork was defined as two-dimensional artistic works made primarily for their aesthetics, rather than any functional purpose. This definition was created from working definitions of visual and fine arts used in previous research[10, 11]. Based on this definition, this review included studies on paintings, drawings and prints and excluded studies on sculpture, films, interior design or architecture. Photographs were only included if they depicted artworks, as it was deemed too difficult to determine the difference between “artistic” photography and “non-artistic” photography based on the definition of artworks provided for this review. Digital artworks were included.

Viewing artworks is a form of visual environmental enrichment and is theorised to be stress-reducing through positive distraction[8, 12]. To explore this theory, the review focused on the effects of viewing visual artworks on stress outcomes. Both psychological and physiological stress outcomes were included.

### Objective and Research Questions

1  
2  
3 The aim of this scoping review was to systematically identify the current evidence available on the  
4 effects of viewing visual artworks on stress outcome measures and identify research and knowledge  
5 gaps to aid future research. The following research question was formulated: what research has  
6 been conducted on the effects of viewing visual artworks on stress outcomes in any populations and  
7 settings?  
8  
9

10 Several secondary questions were developed to map the available evidence:

- 11 What populations and settings were studied?
  - 12 What study methodologies were used?
  - 13 What stress outcomes were measured?
  - 14 What type and content of artworks were viewed?
  - 15 What was the duration of the artwork viewing and how many artworks were viewed?
  - 16 Did the studies show changes in the stress outcomes?
- 17  
18  
19

## 20 **METHODS**

21 A preliminary search for previous reviews on this topic was conducted on Google Scholar, JBI  
22 Evidence Synthesis and the Cochrane Database of Systematic Reviews prior to creating the protocol.

### 23 **Protocol**

24 A scoping review protocol was developed based on the Joanna Briggs Institute (JBI) methodology for  
25 scoping reviews[13] and using the preferred reporting items for systematic reviews and meta-  
26 analyses extension for scoping reviews (PRISMA-ScR). The objectives, eligibility criteria and methods  
27 were specified in advance and documented in the protocol registered at [osf.io/gq5d8](https://osf.io/gq5d8).

### 28 **Eligibility Criteria**

29 Studies had to meet the following inclusion criteria; be a primary study where participants passively  
30 viewed at least one visual artwork as an intervention, including viewing paintings, drawings, prints,  
31 digital artwork, or photographs of artworks, and measured at least one stress outcome measure  
32 (physiological or psychological indices). Measures of anxiety or mood were not considered as direct  
33 measures of stress and therefore fell out of the scope of this review. Unpublished research, including  
34 working papers, theses/dissertations and conference proceedings were included if they were  
35 identified by the search.

36 Studies were excluded if participants had active engagement in the arts (e.g. studies on art therapy  
37 or the production/creation of art), the study investigated the effects of interior design, architecture,  
38 sculpture, films or photography not depicting artworks, and review papers, including systematic  
39 reviews, scoping reviews and meta-analyses.

40 As per the scoping review objectives, there were no restrictions in terms of populations, contexts,  
41 dates of publication or study designs. However, during the screening phase, it was decided to  
42 exclude qualitative studies as these studies did not have clear stress outcomes, which was a key  
43 inclusion criterion. Only studies published in the English language were considered.

### 44 **Search Strategy**

45 To identify potentially relevant studies, the following electronic databases were systematically  
46 searched; Medline, Embase, APA PsycINFO, Cochrane CENTRAL, Scopus and Google Scholar (first 30  
47 pages), with the help of a subject librarian. The search string combined a set of artwork and stress  
48 terms within each set with "OR" and between the two sets with "AND." The search was first  
49  
50  
51  
52  
53  
54  
55  
56  
57  
58  
59  
60

1  
2  
3 conducted using an extended list of search terms from the registered protocol; however, this search  
4 strategy resulted in a large number of irrelevant articles. Therefore, in the final search, some of the  
5 more ambiguous search terms were removed to refine the search further. For example, the term  
6 'drawing' was removed as this could refer both to artistic drawings and 'drawing' blood. The final  
7 search strategies for two example databases are presented in Table 1.  
8  
9

10 The grey literature was searched using the same search terms to identify any unpublished studies.  
11 Grey literature databases searched included; Google (limited to the first 20 pages), ProQuest theses  
12 and dissertations database, APA PsycExtra and Opengrey.eu.  
13

14 A search was then conducted by hand of the reference lists of relevant identified articles. Lastly, the  
15 'cited by' feature of Google Scholar was used to see if any of the relevant studies had been cited by  
16 undetected articles. All extracted references from these searches were imported to RefWorks and all  
17 duplicates removed. The final search was executed on 27 May 2020. The number of studies  
18 identified by the search strategy is shown in Figure 1.  
19  
20

### 21 **Screening and Study Selection**

22  
23 Screening of the studies identified by the search strategy was conducted by two independent  
24 reviewers using a two-staged approach using the programme Covidence ([www.covidence.org](http://www.covidence.org)). Due  
25 to the high volume and large number of unrelated studies identified, one author initially screened  
26 the titles and removed any irrelevant studies, before the first stage. In the first stage of screening,  
27 two reviewers independently screened the abstracts for the eligibility criteria. If a study's eligibility  
28 was judged to be uncertain, the article was included in the second stage. In the second stage, two  
29 reviewers screened the full texts of the studies to determine final inclusion or exclusion based on the  
30 eligibility criteria. The two stages were conducted by the reviewers independently, with the results  
31 of each stage discussed. Any disagreements related to eligibility of an article were discussed and  
32 agreement was reached. The two reviewers had overall 86% agreement. The number of included  
33 and excluded studies at each stage of the screening procedure is shown in Figure 1, with reasons for  
34 exclusion.  
35  
36  
37

### 38 **Data Extraction and Analysis**

39  
40 Data was extracted from each included study into a charting form by the two reviewers  
41 independently. This charting form was developed in accordance with the review questions. It  
42 included; publication details (i.e. title, year, authors), methodology (i.e. aims, design, population  
43 characteristics, setting, outcomes, study registration, power analyses, comparator groups,  
44 randomisation and blinding), artwork details (i.e. type and content of artwork, duration of artwork  
45 viewing, number of artworks), and key findings related to scoping review questions.  
46  
47

48 The charting form was iteratively refined during the extraction process to ensure all useful  
49 information was extracted. The charting form was first independently pilot tested by the two  
50 reviewers on a random sample of four studies. The reviewers discussed this process and amended  
51 the charting form by adding a column about the artwork viewing directives given to the participants.  
52 Data extraction was then completed for the remaining studies independently by the two reviewers  
53 and any inconsistencies were discussed. This extracted data is reported in tabular and descriptive  
54 text format to answer the review questions.  
55  
56

### 57 **Patient and Public Involvement**

58 Patients and the public were not involved in any phase of this review.  
59  
60

## RESULTS

As shown in Figure 1, the search strategy resulted in 3882 texts, which were screened for eligibility. After the initial title and abstract screening, the full text was retrieved for 53 articles and examined against the eligibility criteria. During this process, three theses were found to have matching published journal articles and therefore were excluded as duplicates. The remaining excluded articles did not meet the eligibility criteria. This screening narrowed the studies down to 14 articles for inclusion.

The design and key findings related to the stress outcomes of each study are briefly detailed in Table 2, with specific details regarding the secondary review questions provided in Table 3. All 14 articles were primary studies published as journal articles. Apart from the duplicate theses mentioned above, no grey literature met the eligibility criteria for inclusion. The studies' publication dates ranged from 1972 to 2020. Eight studies came from Europe[9, 14-20], four from the United States of America[10, 21-23] and one each from Australia[24] and New Zealand[25].

### Summary of Study Methodologies

**Designs.** The 14 studies had very different designs and methodologies (see Table 3). Only nine studies used a between groups design[9, 10, 14, 16, 17, 20, 22, 23, 25]. Another four used a within groups design, where measures were compared pre- to post-viewing the artworks, with no comparator groups[15, 18, 19, 24]. The final study used a cross-sectional design, measuring stress-reduction at one time-point[21].

Of the nine between groups designs, six used a no artwork control group as a comparator[9, 10, 17, 20, 22, 23], and one used scrambled versions of the artworks[25]. Krauss et al.[16] gave different viewing directives to each group and de Jong[14] had groups with different art experience levels. Four of these between groups studies were considered randomised controlled trials (RCTs)[9, 10, 16, 20].

**Settings.** Six studies were conducted in an art gallery or museum[15, 16-19, 24], three in a laboratory[14, 22, 25], four in hospital rooms or hospital public spaces[9, 10, 21, 23], and one in senior citizens' apartments[20]. These settings represent a mix of both naturalistic settings with high ecological validity and laboratory settings with high experimental control.

**Populations.** The majority of studies investigated healthy participants in the form of students[14, 17, 22], office workers[15] or the general public[16, 18, 19, 25]. Other research used patient populations known to have high stress levels. Four studies investigated hospitalised patients[9, 21], with two being paediatric samples[10, 23]. Lastly, D'Cunha et al[24] investigated people living with dementia and Wikström et al[20], elderly women.

There is little research on whether population type affects stress reactions. Very few studies compared demographic factors, with the following exceptions. De Jong[14] found that having different art experience affected outcomes. Three studies found significant differences between the stress-reducing effects of viewing artwork between males and females[10, 15, 22]. Lastly, one study compared results across different health conditions, but found similar results between groups[21].

**Outcomes.** Nine studies explored only physiological stress measures[14, 16, 19, 20, 23-25], three explored only psychological stress measures[9, 21, 22] and the remaining two explored both[10, 15]. The psychological stress measures included; the Cox Mackay Stress Arousal checklist[26], a stress adjective checklist[27], Likert scales, and a distress thermometer[28]. The physiological measures were mainly cardiovascular, including blood pressure, heart rate and skin conductance, which were

1  
2  
3 measured in eight studies. Salivary biomarkers were measured in three studies[15, 24, 25] including  
4 cortisol, alpha-amylase and interleukin-6. Respiration was measured in two studies[10, 14].  
5

6 **Registration details.** None of the studies were pre-registered.  
7

8 **Power.** Sample sizes ranged from 27 to 826 participants; however, only two studies conducted a  
9 power analysis to determine their sample size. Krauss et al's[16] power analysis gave a required  
10 sample size of at least 68, and a final sample of 75 was recruited. The power analysis in McCabe et  
11 al[9] gave 200 participants and a sample of 199 were recruited; however, only 164 were included in  
12 the analyses. The other 12 studies did not provide a power analysis. Law et al[25] was a pilot study,  
13 and was not expected to conduct a power analysis to determine sample size. Therefore, it is difficult  
14 to determine if all studies were adequately powered.  
15

16 **Randomisation.** All nine between-groups studies reported randomisation of participants to groups.  
17 However, the method of randomisation was not stated in many studies. Only four studies[9, 10, 16,  
18 20] were RCTs.  
19

20 **Blinding.** For most studies, it was difficult to blind the participants, because in most cases  
21 participants were explicitly asked to view particular artworks, and therefore both the researcher and  
22 participants were aware of which artworks they were viewing. However, two studies did successfully  
23 blind the study as both the researchers/nurses collecting the stress measures and the participants  
24 themselves were not explicitly made aware of the presence (or absence) of the artworks[23, 25].  
25

## 26 **Summary of the Artwork Interventions**

27 **Types of artworks.** 10 studies used physical artworks. Most were original paintings, however one  
28 study used posters depicting artworks[22] and another used a window mural[23]. Another three  
29 studies used digital reproductions of artworks. Two used slideshows of digital images[14, 25],  
30 whereas the third used the Open Window, which digitally projected artworks[9]. The last study  
31 directly compared physical artworks with their digital reproductions[18]. This study did not find any  
32 differences between the types of artwork, indicating that digital reproductions may be just as stress-  
33 reducing as physical artworks.  
34

35 **Content of artworks.** The content ranged from representational nature images, to complex abstract  
36 artworks. Five studies provided an assortment of artwork content in one exhibition[15, 17, 21, 24]  
37 and therefore it could not be determined whether content was influential. Two studies investigated  
38 the effects of abstract artwork but did not compare these to another artwork type[16, 18]. Another  
39 study[14] compared the physiological effects of artworks rated to be 'ugly' or 'beautiful.' Although  
40 the exact content of the artwork was not described, this study did find that participants had higher  
41 skin conductance and respiration rates while viewing the 'beautiful' paintings, compared to the  
42 'ugly' paintings, demonstrating that the aesthetic content of the artwork may influence their effects.  
43

44 Another four studies investigated the effects of viewing nature artworks. Two studies found that  
45 self-reported stress was lower when viewing nature artworks compared to abstract artworks[10,  
46 22]. One study found that different aspects of nature might have stronger effects; a forest mural  
47 resulted in larger blood pressure decreases than an aquatic mural[23]. Nature content may also  
48 affect biological indicators of stress responses; cortisol levels decreased faster after a stressor in  
49 people viewing scrambled versions of nature artworks, compared to the original nature  
50 artworks[25].  
51

52 The remaining two studies[9, 20] did not report on the content of the artwork and therefore, cannot  
53 be categorised.  
54  
55  
56  
57  
58  
59  
60



1  
2  
3 **Duration of artwork viewing.** Nine studies reported the duration participants spent looking at the  
4 artwork (see Table 3). This ranged from two minutes to over 48 hours. No study investigated  
5 whether changing the duration of exposure to artworks affected stress outcomes.  
6

7 **Quantity of artworks.** Most of the studies did not specify the exact number of artworks viewed. Of  
8 those studies that did specify a number, it ranged from one artwork to over 5300 in one exhibition.  
9 Half of the studies had participants view a collection of artworks as an exhibition or art programme.  
10 Only two studies showed each participant one artwork and both were in paediatric hospital  
11 rooms[10, 23]. The other experimental studies ranged from viewing four to 26 artworks in one  
12 sitting, with the exact numbers provided in Table 3.  
13  
14

15 **Viewing directives.** Five studies explicitly mentioned the viewing directives given to participants. The  
16 researchers from two experimental studies told participants to attentively look at and explore each  
17 artwork[14, 18], whereas the researcher in another study asked visitors to explore the art gallery in  
18 any way they pleased[15]. The remaining two studies asked participants to discuss and describe each  
19 artwork to the group during art programmes[20, 24]. One of these studies[24] had a trained art  
20 educator facilitating the discussions, whereas the other[20] had a lead researcher, with no specified  
21 training.  
22  
23

#### 24 **Summary of Key Findings**

25  
26 All but one of the studies that measured self-reported stress found a significant decrease after  
27 viewing artwork[10, 15, 21, 22], with the final study showing no significant changes[9]. A consistent  
28 decrease in systolic blood pressure was also found across the four studies measuring blood  
29 pressure[10, 17, 20, 23]. Skin conductance and skin conductance variability both increased while  
30 viewing artworks[14, 16, 19]. The results for heart rate were mostly consistent. Two of the three  
31 studies that measured heart rate found that viewing artworks decreased heart rate[19, 23]. The  
32 other study found that viewing beautiful paintings increased heart rate for students trained in fine  
33 arts and decreased heart rate for other participants[14].  
34  
35

36 The cortisol and respiration results were less consistent. An art gallery visit decreased salivary  
37 cortisol levels[15]; however, a six week art intervention for people living with dementia increased  
38 waking cortisol levels[24]. Lastly, after a stressor, salivary cortisol decreased faster in those viewing  
39 scrambled images, compared to those viewing landscapes[25]. Viewing beautiful paintings lead to an  
40 increase in respiration rates in a healthy sample[14]. Whereas nature artworks in a hospital room  
41 decreased respiration rates in children[10]. These studies all had different samples, settings and  
42 artworks which may have accounted for these mixed findings. Lastly both alpha-amylase[25] and  
43 interleukin- 6[24] were each only measured in one study and showed no significant changes.  
44  
45  
46

#### 47 **DISCUSSION**

48  
49 This scoping review aimed to identify the available evidence on the effects of viewing visual artworks  
50 on stress outcomes and identify gaps in the research. The 14 included studies demonstrate that  
51 research in this area is growing, with 10 studies being published in the last 10 years. There are a  
52 number of limitations to research in this area, including a paucity of RCTs, and heterogeneous  
53 methodologies and interventions. This scoping review was able to comprehensively identify the  
54 relevant research and descriptively present some evidence to address the research questions  
55 outlined in the introduction and identify gaps for future research, as detailed below.  
56  
57

58 Overall, the preliminary findings from the included studies support the claim that viewing artworks  
59 can reduce stress, in particular self-reported stress and systolic blood pressure. These preliminary  
60

1  
2  
3 quantitative results support qualitative research showing that viewing artworks provides positive  
4 distraction from a hospital environment and lowers self-reported stress[9, 12, 29]. The findings  
5 indicated that digital artworks can have similar stress-reducing effects to physical artworks, thus  
6 increasing the avenues available for viewers. Artwork interventions can therefore be transposed  
7 onto computers, TVs, phones and tablets, as a portable, cheap and easy intervention for stress-  
8 reduction.  
9

10  
11 Together the preliminary evidence suggest that the provision of artworks could reduce stress.  
12 However, mixed findings combined with a lack of homologous methodologies mean that more  
13 rigorous research is needed. Future research needs to employ stronger methods including: adequate  
14 comparator groups, power analyses to ensure sufficient sample sizes, clearly defined randomisation  
15 procedures and pre-registration. If we examine the results from just the four RCTs, the evidence is  
16 even less conclusive. More detail on these studies and their findings are provided in Table 2;  
17 however, only one of the four RCTs showed significant effects for their main hypotheses. Wikström  
18 et al[20] found a significant decrease in systolic blood pressure after an art intervention. In contrast,  
19 McCabe et al[9] found no significant effects on distress measures, and Eisen et al[10] only found  
20 significant effects when subgroup analyses of age were conducted. Lastly, Krauss et al[16] did find  
21 significant decreases in physiological stress when viewing artworks compared to baseline; however,  
22 they found no significant differences between the viewing directives provided, which was their main  
23 hypothesis. Therefore, more RCTs still need to be conducted on this topic for clearer conclusions to  
24 be made.  
25  
26  
27

28  
29 The differences between the studies suggest important moderating factors, one of which is setting.  
30 The museum context may add to the effects of viewing artwork, as museum related factors may lead  
31 to greater appreciation of artwork[30]. In addition, viewing artwork in a museum usually involves  
32 walking, which has its own stress-reducing effects[31]. Laboratory studies remove some of these  
33 contextual factors and may provide more specific evidence for the effects of viewing artworks, but  
34 they have lower ecological validity. The hospital room is an important setting as patients are often  
35 confined to their room for long time-periods and rooms are often deprived of environmental  
36 enrichment. Artwork could act as visual stimulation to positively distract patients from their stress,  
37 pain and medical conditions, and therefore it is suggested that artwork is placed in hospital rooms  
38 and waiting rooms. Artwork could also have stress-reducing benefits in other settings such as  
39 waiting rooms and workplaces, which are often related to high stress. More research in these  
40 settings should be conducted.  
41  
42  
43

44 Other possible moderating factors include individual characteristics, although little research has  
45 investigated these. Gender differences were found in two of the included studies, with a trend  
46 towards females experiencing greater stress-reduction in response to nature artworks[10, 22]. One  
47 small survey found that African Americans and Caucasians have similar preferences for nature  
48 artworks[32]; however, no study has investigated whether culture affects the stress-reducing effects  
49 of artworks. Given the diversity in cultures, demographics and individual preferences for artwork, it  
50 may be over simplistic to suggest that all individuals experience artwork the same way[33].  
51  
52

53 The findings indicate that the content and aesthetic qualities of artwork are also important  
54 considerations. Although mixed, the studies generally indicated that nature, especially greenery,  
55 may be the most stress-reducing. This is consistent with research demonstrating that nature artwork  
56 is most preferred by adults[34] and children[10]. There are two main theories as to why viewing  
57 nature is beneficial for humans. The evolutionary theory proposes that because humans evolved in a  
58 natural environment, nature is processed more efficiently and we are predisposed to experience  
59 restoration[35]. On the other hand, the attention restoration theory posits that nature can  
60



1  
2  
3 counteract the mental fatigue caused by stress and therefore reduce cognitive strain[36]. Thus,  
4 these two theories point to nature artwork as having the greatest stress reducing effects, as  
5 demonstrated in this review. In contrast, abstract artworks can be seen as challenging, ambiguous  
6 and unclear for viewers, leading to increased stress[30, 37]. This is supported by the emotional  
7 congruence theory which posits that stressed people are likely to project their negative experiences  
8 and emotions onto ambiguous environmental surroundings, including artworks[5]. Other artwork  
9 content could be provocative and emotionally inappropriate for certain situations, eliciting anger  
10 and dislike. For example, a study by Ho and colleagues[33] found that certain provocative artworks  
11 elicited feelings of loneliness and hopelessness in viewers, suggesting artwork must be chosen  
12 carefully, with particular emphasis on the provision of nature artworks.  
13  
14

15  
16 The mixed findings suggest that under some conditions, viewing artwork may be physiologically  
17 relaxing, whereas under other conditions viewing artwork may be physiologically stimulating. The  
18 direction of these effects may not only depend upon the content of the artwork, but also the context  
19 and viewers' stress levels. Regardless of the direction of effects on physiology, lower self-reported  
20 stress may result.  
21

22  
23 Although this review focussed on the stress-reducing effects of viewing artwork, it may also be  
24 important to investigate the stimulating aspects of artwork. For certain populations, such as people  
25 living with dementia, visual stimulation and enrichment through artworks could improve other  
26 aspects of health, such as cognitive function[24]. As discussed above, visual stimulation and  
27 enrichment may also be important to provide positive distraction from negative experiences. Three  
28 studies showed an increase in physiological stress[14, 24, 25]. This increased stimulation may be  
29 related to the content of the artworks ('beautiful' vs 'ugly' paintings[14], or landscapes vs scrambled  
30 images[25]) or the types of populations involved (people living with dementia[24] and art  
31 students[14]). Therefore, the provision of stimulating artworks may be appropriate for certain  
32 situations, including for people living with dementia.  
33  
34

35  
36 Choice may be another important variable. This is especially pertinent in settings where people have  
37 little control. Art Carts have been used in hospitals to allow patients to choose which artworks to  
38 view during their stay to give them a sense of control over their environment[29]. Two studies in this  
39 review[9, 20] gave participants a choice of artwork, however research is yet to investigate whether  
40 the element of choice affects stress outcomes.  
41

42  
43 Directives given to viewers may influence the way participants view artworks and therefore  
44 moderate the artworks' stress-reducing effects. Wikström[38] previously discussed the importance  
45 of creating an art-dialogue when viewing and discussing artworks in order to improve engagement,  
46 understanding and empowerment. Other research[33] demonstrated that the descriptions given to  
47 viewers about artwork could be influential, and therefore this may be an important element for  
48 studies to include. However, few studies reported the directives given. It is important for future  
49 research to report what directives were provided and investigate whether this is influential.  
50

51  
52 Finally, it is difficult to determine the dose-response relationship of artwork viewing. There was little  
53 consistency in the number of artworks shown to each participant, and no study investigated  
54 whether the quantity of artworks or viewing durations mattered. Therefore, future research could  
55 investigate the best artwork viewing duration and number of works.  
56

### 57 **Limitations**

58  
59 This review is limited by only including articles published in the English language. Articles in other  
60 languages could have been missed. The review deviated slightly from the original protocol. Due to

1  
2  
3 the large number of irrelevant articles identified using the original search strategy, the search terms  
4 were narrowed and the original title screening was only conducted by one reviewer. These  
5 deviations were required to make the search and screening more feasible. This review did not  
6 include anxiety or mood measures or studies using qualitative methodology, as these outcomes  
7 were considered outside the scope of the review.  
8  
9

## 10 **Conclusions**

11 This scoping review summarised the relevant research that investigated viewing visual artworks on  
12 stress outcomes. 14 studies met the eligibility criteria, with extracted results showing consistent  
13 reductions in self-reported stress and systolic blood pressure, but mixed effects on other  
14 physiological outcomes. However, there were only four RCTs, and there was high heterogeneity in  
15 research methodologies. Setting, individual characteristics, artwork content, and viewing  
16 instructions may be important moderating factors. More robust research is recommended that uses  
17 standardised interventions, validated assessment methods, and RCT designs, to investigate the  
18 effects of viewing visual art on stress outcomes.  
19  
20  
21  
22  
23  
24  
25  
26  
27  
28  
29  
30  
31  
32  
33  
34  
35  
36  
37  
38  
39  
40  
41  
42  
43  
44  
45  
46  
47  
48  
49  
50  
51  
52  
53  
54  
55  
56  
57  
58  
59  
60

## References

1. Boyce M, Bungay H, Munn-Giddings C, et al. The impact of the arts in healthcare on patients and service users: A critical review. *Health Soc Care Community* 2018;26(4):458-73. <https://doi.org/10.1111/hsc.12502>
2. Carswell C, Reid J, Walsh I, et al. Arts-based interventions for hospitalised patients with cancer: A systematic literature review. *British Journal of Healthcare Management* 2018;24(12):611-6. <https://doi.org/10.12968/bjhc.2018.24.12.611>
3. Van Lith T. Art therapy in mental health: A systematic review of approaches and practices. *Arts Psychother* 2016;47:9-22. <https://doi.org/10.1016/j.aip.2015.09.003>
4. Vetter D, Barth J, Uyulmaz S, et al. Effects of art on surgical patients: a systematic review and meta-analysis. *Ann Surg* 2015;262(5):704-13. <https://doi.org/10.1097/SLA.0000000000001480>
5. Hathorn K, Nanda U. A guide to evidence-based art. *The Center for Health Design* 2008:1-22.
6. Davies CR, Rosenberg M, Knuiaman M, et al. Defining arts engagement for population-based health research: Art forms, activities and level of engagement. *Arts Health* 2012;4(3):203-16. <https://doi.org/10.1080/17533015.2012.656201>
7. Spooner H. Embracing a full spectrum definition of art therapy. *Art Ther* 2016;33(3):163-6. <https://doi.org/10.1080/07421656.2016.1199249>
8. Lankston L, Cusack P, Fremantle C, et al. Visual art in hospitals: Case studies and review of the evidence. *J R Soc Med* 2010;103(12):490-9. <https://doi.org/10.1258/jrsm.2010.100256>
9. McCabe C, Roche D, Hegarty F, et al. 'Open Window': A randomized trial of the effect of new media art using a virtual window on quality of life in patients' experiencing stem cell transplantation. *Psycho-Oncology* 2013;22(2):330-7. <https://doi.org/10.1002/pon.2093>
10. Eisen SL, Ulrich RS, Shepley MM, et al. The stress-reducing effects of art in pediatric health care: Art preferences of healthy children and hospitalized children. *Journal of Child Health Care* 2008;12(3):173-90. <https://doi.org/10.1177/1367493508092507>
11. Lacey S, Hagtvedt H, Patrick VM, et al. Art for reward's sake: Visual art recruits the ventral striatum. *Neuroimage* 2011;55(1):420-33. <https://doi.org/10.1016/j.neuroimage.2010.11.027>
12. George DR, de Boer C, Green MJ. "That landscape is where I'd like to be...": Offering patients with cancer a choice of artwork *JAMA*. 2017;317(9):890-2. <https://doi.org/10.1001/jama.2017.1233>
13. Peters MDJ, Godfrey CM, Mclnerney P, et al. Chapter 11: Scoping reviews (2020 version). In: Aromataris E, Munn Z, eds. *JBI Manual for Evidence Synthesis*, JBI 2020. <https://doi.org/10.46658/JBIMES-20-12>
14. de Jong MA. A physiological approach to aesthetic preference. I. Paintings. *Psychother Psychosom* 1972;20(6):360-5. <https://doi.org/10.1159/000286439>
15. Clow A, Fredhoi C. Normalisation of salivary cortisol levels and self-report stress by a brief lunchtime visit to an art gallery by London City workers. *Journal of Holistic Healthcare* 2006;3(2):29-32.

16. Krauss L, Ott C, Opwis K, et al. Impact of contextualizing information on aesthetic experience and psychophysiological responses to art in a museum: A naturalistic randomized controlled trial. *Psychol Aesthet Creat Arts* 2019;Advanced Online Publication. <https://doi.org/10.1037/aca0000280>
17. Mastandrea S, Maricchiolo F, Carrus G, et al. Visits to figurative art museums may lower blood pressure and stress. *Arts Health* 2019;11(2):1-10. <https://doi.org/10.1080/17533015.2018.1443953>
18. Siri F, Ferroni F, Ardizzi M, et al. Behavioral and autonomic responses to real and digital reproductions of works of art. *Prog Brain Res* 2018;237:201-21. <https://doi.org/10.1016/bs.pbr.2018.03.020>
19. Tschacher W, Greenwood S, Kirchberg V, et al. Physiological correlates of aesthetic perception of artworks in a museum. *Psychol Aesthet, Creat Arts* 2012;6(1):96. <https://doi.org/10.1037/a0023845>
20. Wikström B, Theorell T, Sandström S. Medical health and emotional effects of art stimulation in old age. *Psychother Psychosom* 1993;60(3-4):195-206. <https://doi.org/10.1159/000288693>
21. Karnik M, Printz B, Finkel J. A hospital's contemporary art collection: effects on patient mood, stress, comfort, and expectations. *HERD* 2014;7(3):60-77. <https://doi.org/10.1177/193758671400700305>
22. Kweon B, Ulrich R, Walker V, et al. Anger and stress: The role of landscape posters in an office setting. *Environ Behav* 2008;40(3):355-81. <https://doi.org/10.1177/0013916506298797>
23. Pearson M, Gaines K, Pati D, et al. The physiological impact of window murals on pediatric patients. *HERD* 2019;12(2):116-29. <https://doi.org/10.1177/1937586718800483>
24. D'Cunha NM, McKune AJ, Isbel S, et al. Psychophysiological responses in people living with dementia after an art gallery intervention: An exploratory study. *J Alzheimer's Dis* 2019;72(2):549-62. <https://doi.org/10.3233/JAD-190784>
25. Law M, Minissale G, Lambert A, et al. Viewing landscapes is more stimulating than scrambled images after a stressor: A cross-disciplinary approach. *Front Psychol* 2020;10:3092. <https://doi.org/10.3389/fpsyg.2019.03092>
26. Mackay C, Cox T, Burrows G, et al. An inventory for the measurement of self-reported stress and arousal. *Br J Soc Clin Psychol* 1978;17(3):283-4. <https://doi.org/10.1111/j.2044-8260.1978.tb00280.x>
27. King MG, Burrows GD, Stanley GV. Measurement of stress and arousal: Validation of the stress/arousal adjective checklist. *Br J Psychol* 1983;74(4):473-9. <https://doi.org/10.1111/j.2044-8295.1983.tb01880.x>
28. Roth AJ, Kornblith AB, Batel-Copel L, et al. Rapid screening for psychologic distress in men with prostate carcinoma: A pilot study. *Cancer* 1998;82(10):1904-8. [https://doi.org/10.1002/\(sici\)1097-0142\(19980515\)82:10<1904::aid-cnrc13>3.0.co;2-x](https://doi.org/10.1002/(sici)1097-0142(19980515)82:10<1904::aid-cnrc13>3.0.co;2-x)
29. Suter E, Baylin D. Choosing art as a complement to healing. *Appl Nurs Res* 2007;20(1):32-8. <https://doi.org/10.1016/j.apnr.2005.11.004>
30. Mastandrea S. Visitor's approaches, personality traits and psycho-physiological well-being in different art style museums. *International and Interdisciplinary Conference on Digital Environments for Education, Arts and Heritage*; Springer; 2018.

- 1  
2  
3 31. Kelly P, Williamson C, Niven AG, et al. Walking on sunshine: Scoping review of the evidence for  
4 walking and mental health. *Br J Sports Med* 2018;52(12):800-6. [http://dx.doi.org/10.1136/bjsports-](http://dx.doi.org/10.1136/bjsports-2017-098827)  
5 2017-098827  
6  
7 32. Hathorn K, Ulrich R. The therapeutic art program of Northwestern Memorial Hospital. *Creating*  
8 *Environments that Heal: Proceedings of the Symposium On Healthcare Design*; 2001.  
9  
10 33. Ho RT, Potash JS, Fang F, et al. Art viewing directives in hospital settings effect on mood. *HERD*  
11 2015;8(3):30-43. <https://doi.org/10.1177/1937586715575903>  
12  
13 34. Nanda U, Eisen SL, Baladandayuthapani V. Undertaking an art survey to compare patient versus  
14 student art preferences. *Environ Behav* 2008;40(2):269-301.  
15 <https://doi.org/10.1177/0013916507311552>  
16  
17 35. Ulrich R, Simons R, Miles M. Effects of environmental simulations and television on blood donor  
18 stress. *J Archit Plann Res* 2003;20(1):38-47. <https://www.jstor.org/stable/43030641>  
19  
20 36. Kaplan S. The restorative benefits of nature: Toward an integrative framework. *J Environ Psychol*  
21 1995;15:169-82. [https://doi.org/10.1016/0272-4944\(95\)90001-2](https://doi.org/10.1016/0272-4944(95)90001-2)  
22  
23 37. Ulrich R. How design impacts wellness. *Healthc Forum J* 1992;35(5):20-5.  
24  
25 38. Wikström B. The dynamics of visual art dialogues: Experiences to be used in hospital settings  
26 with visual art enrichment. *Nurs Res Practi* 2011;2011:204594.  
27 <https://doi.org/10.1155/2011/204594>  
28  
29  
30  
31  
32  
33  
34  
35

36 **Authors' contributions:** ML and EB conceptualised the project and designed the scoping review  
37 protocol. ML performed the search strategy. ML and NK performed the study screening and data  
38 extraction. ML wrote the manuscript. EB and NK edited the manuscript. All authors approved the  
39 final manuscript. ML made the revisions to the manuscript.  
40

41 **Funding statement:** This research received no specific grant from any funding agency in the public,  
42 commercial or not-for-profit sectors.  
43

44 **Competing interests:** None  
45

46 **Data availability statement:** Data sharing not applicable as no datasets generated and/or analysed  
47 for this study  
48

49 **Ethics Approval:** Not applicable  
50  
51  
52  
53  
54  
55  
56  
57  
58  
59  
60

**Figure 1.** PRISMA-ScR flow diagram of the study selection process

For peer review only

1  
2  
3  
4  
5  
6  
7  
8  
9  
10  
11  
12  
13  
14  
15  
16  
17  
18  
19  
20  
21  
22  
23  
24  
25  
26  
27  
28  
29  
30  
31  
32  
33  
34  
35  
36  
37  
38  
39  
40  
41  
42  
43  
44  
45  
46  
47  
48  
49  
50  
51  
52  
53  
54  
55  
56  
57  
58  
59  
60

Table 1

*Example search strategy syntax for databases*

| Database                          | Search Strategy Syntax                                                                                                                                                                                                                                                                                                                                                                                                                                                                           |
|-----------------------------------|--------------------------------------------------------------------------------------------------------------------------------------------------------------------------------------------------------------------------------------------------------------------------------------------------------------------------------------------------------------------------------------------------------------------------------------------------------------------------------------------------|
| Scopus                            | ( TITLE-ABS-KEY ( artwork OR "art work" OR "visual art" OR "art museum" OR painting OR mural OR "works of art" OR "viewing art" OR "viewing artwork" OR "artwork viewing" OR "art gallery" OR "art galleries" ) AND TITLE-ABS-KEY ( stress OR "blood pressure" OR anxiety OR "heart rate" OR mood OR norepinephrine OR epinephrine OR "stress hormones" OR stressor OR glucocorticoids OR cortisol OR alpha-amylase OR "stress reduction" ) ) AND ( LIMIT TO ( LANGUAGE , "English" ) )          |
| ProQuest Dissertations and Thesis | ab(artwork OR "art work" OR "visual art" OR "art museum" OR painting OR mural OR "works of art" OR museum OR "viewing art" OR "artistic work" OR "viewing artwork" OR "artwork viewing" OR "art gallery" OR "art galleries") AND ab(stress OR "blood pressure" OR anxiety OR respiration OR "heart rate" OR mood OR norepinephrine OR epinephrine OR "stress hormones" OR "mental health" OR stressor OR glucocorticoids OR cortisol OR alpha-amylase OR "immune marker" OR "stress reduction" ) |

Table 2

Summaries of the studies' designs and key stress outcome findings

| Study                     | Study Design and Methods                                                                                                                                                                                                                                                                                                                                                                                                               | Key Findings                                                                                                                                                                                                                                                                                                                                                                                                        |
|---------------------------|----------------------------------------------------------------------------------------------------------------------------------------------------------------------------------------------------------------------------------------------------------------------------------------------------------------------------------------------------------------------------------------------------------------------------------------|---------------------------------------------------------------------------------------------------------------------------------------------------------------------------------------------------------------------------------------------------------------------------------------------------------------------------------------------------------------------------------------------------------------------|
| Clow & Fredhoi (2006)[15] | Studied self-reported stress and arousal, and salivary cortisol levels in a group of London city workers during a lunchtime visit to an art gallery. Measurements were taken before and after the 35-40-minute gallery visit to explore pre-post intervention changes.                                                                                                                                                                 | Self-reported stress and salivary cortisol levels both decreased over the intervention. There were no differences in arousal levels.                                                                                                                                                                                                                                                                                |
| D'Cunha et al (2019)[24]  | Evaluated the psychophysiological effects of attending the National Art Gallery of Australia Art and Dementia programme. People living with dementia attended the group-based, six-week programme which involved viewing and discussing artworks, led by an art director. Measures of salivary cortisol and interleukin-6 were taken at baseline, at the end of the programme and 12 weeks later.                                      | Waking salivary cortisol levels increased from baseline to post-intervention, but decreased at follow-up. No changes in evening cortisol or interleukin-6 were observed. The ratio of waking to evening cortisol increased from baseline to post-intervention indicating a more dynamic diurnal cortisol rhythm.                                                                                                    |
| de Jong (1972)[14]        | Three groups of participants (advanced art history students, advanced fine art students and laboratory workers as controls) viewed projections of 12 paintings considered to be 'beautiful' and 12 paintings considered to be 'ugly' in a random order while their heart rate, respiration rate and skin conductance was measured continuously.                                                                                        | The fine arts and art history students showed a greater change in skin conductance than the laboratory workers. Respiration and skin conductance were higher during the 'beautiful' paintings than the 'ugly' paintings in all groups. The fine arts students had faster heart rate during the 'beautiful' paintings compared to the 'ugly' paintings, however, for the other two groups, this result was reversed. |
| Eisen et al (2008)[10]    | The third phase this study investigated which type of art was most effective in reducing stress in paediatric patients. On arrival to the hospital, patients were randomly allocated to one of three rooms; a room with a nature artwork, a room with an abstract artwork or a room with no artwork. Self-reported stress, blood pressure and respiratory rate were taken at baseline and after two hours of exposure to the artworks. | Overall, there were no significant differences between the groups on stress, blood pressure or respiration. However, sub-analyses showed that significantly more males than females in the 8-10 age group were positively affected by the nature artwork, as demonstrated by decreased self-reported stress, blood pressure and respiratory rates.                                                                  |
| Karnik et al (2014)[21]   | Installed a diverse collection of artworks in the public spaces and clinic rooms of a hospital. Patients were retrospectively contacted with a survey which included evaluating whether the art installations changed their self-reported stress levels.                                                                                                                                                                               | 61% of the patients that reported seeing the artworks stated that the artworks somewhat or significantly reduced their stress levels.                                                                                                                                                                                                                                                                               |



|    |                      |                                                                           |                                                                        |
|----|----------------------|---------------------------------------------------------------------------|------------------------------------------------------------------------|
| 1  |                      |                                                                           |                                                                        |
| 2  |                      |                                                                           |                                                                        |
| 3  | Krauss et al         | Participants viewed six Flemish expressionism artworks in an art          | There were no significant differences in heart rate, heart rate        |
| 4  | (2019)[16]           | museum, while heart rate and skin conductance were continuously           | variability or skin conductance between the two groups. However, in    |
| 5  |                      | measured. Participants were randomly assigned to either receive           | both groups heart rate was lower, and skin conductance and heart       |
| 6  |                      | descriptive information about the artworks (described the artwork in a    | rate variability higher when viewing the artworks, compared to         |
| 7  |                      | declarative way) or elaborative information about the artworks            | baseline.                                                              |
| 8  |                      | (described the context and deeper meaning behind the artworks).           |                                                                        |
| 9  |                      |                                                                           |                                                                        |
| 10 | Kweon et al          | Conducted an experiment investigating the effects of artwork posters on   | Males had the highest stress levels in the office with no posters, and |
| 11 | (2008)[22]           | stress and anger levels in an office setting. Students were asked to      | the lowest stress levels in the office with mixed art posters. On the  |
| 12 |                      | complete a series of stress and anger provoking computer tasks in one of  | other hand, females had the highest stress in the office with all      |
| 13 |                      | four different mock office conditions; an office with nature posters,     | abstract posters and the lowest levels in the office with all nature   |
| 14 |                      | abstract posters, both nature and abstract posters or no posters. Levels  | posters. However, these results were only significant for males and    |
| 15 |                      | of self-reported stress were measured across the experiment.              | not females.                                                           |
| 16 |                      |                                                                           |                                                                        |
| 17 | Law et al (2020)[25] | Conducted a pilot study to investigate whether nature artworks could      | Salivary cortisol levels decreased more rapidly while viewing the      |
| 18 |                      | improve recovery from a laboratory stressor. Participants were            | scrambled images compared to the landscape artworks. There were        |
| 19 |                      | randomised to either view a 30-minute digital slideshow of landscape      | no changes in alpha-amylase across the experiment or between           |
| 20 |                      | artworks or digitally scrambled versions of these artworks after being    | groups.                                                                |
| 21 |                      | exposed to a laboratory stressor. Saliva samples were taken at baseline,  |                                                                        |
| 22 |                      | after the stressor, during the art viewing and after the art viewing to   |                                                                        |
| 23 |                      | measure cortisol and alpha-amylase.                                       |                                                                        |
| 24 | Mastandrea et al     | Students visited an art museum and were randomly assigned to visit one    | Systolic blood pressure decreased in all groups; however, this         |
| 25 | (2019)[17]           | of three art exhibitions for five minutes; a figurative art exhibition, a | decrease was only significant in the figurative art group. Heart rate  |
| 26 |                      | modern art exhibition or a museum office as a control condition. Blood    | also decreased in all three groups, however, there was no significant  |
| 27 |                      | pressure and heart rate were measured before and after the visit.         | differences between groups.                                            |
| 28 |                      |                                                                           |                                                                        |
| 29 | McCabe et al         | Evaluated the effects of the Open Window art intervention on stem-cell    | Results demonstrated no significant differences in levels of distress  |
| 30 | (2013)[9]            | transplantation patients. The Open Window is a virtual window which is    | between the two groups at any of the time-points.                      |
| 31 |                      | installed in a hospital room, where the patients can switch through nine  |                                                                        |
| 32 |                      | art channels with different artworks. Patients were randomised to either  |                                                                        |
| 33 |                      | a room with the Open Window or not. Self-reported distress was            |                                                                        |
| 34 |                      | measured at admission, the day before transplant, seven days after        |                                                                        |
| 35 |                      | transplant, prior to discharge, and 60 days, 100 days and six months      |                                                                        |
| 36 |                      | post-transplant.                                                          |                                                                        |
| 37 | Pearson et al        | Examined the impact of nature-themed window murals on physiological       | Those patients with the window murals had significant improvements     |
| 38 | (2019)[23]           | measures in paediatric patients. Paediatric patients were assigned to     | in heart rate and systolic blood pressure, with the tree-themed mural  |
| 39 |                      | hospital rooms with either a fish-themed window mural, a tree-themed      | having the greatest effect.                                            |
| 40 |                      |                                                                           |                                                                        |
| 41 |                      |                                                                           |                                                                        |
| 42 |                      |                                                                           |                                                                        |
| 43 |                      |                                                                           |                                                                        |
| 44 |                      |                                                                           |                                                                        |
| 45 |                      |                                                                           |                                                                        |
| 46 |                      |                                                                           |                                                                        |

1  
2  
3  
4  
5  
6  
7  
8  
9  
10  
11  
12  
13  
14  
15  
16  
17  
18  
19  
20  
21  
22  
23  
24  
25  
26  
27  
28  
29  
30  
31  
32  
33  
34  
35  
36  
37  
38  
39  
40  
41  
42  
43  
44  
45  
46

window mural or no window mural. Patients' blood pressure and heart rate were taken retrospectively from the patients' medical records.

Siri et al (2018)[18]

Examined the effects of viewing original physical artworks and their digital reproductions within a museum context. Cardiovascular variables were measured via ECG continuously in healthy volunteers while viewing two real abstract paintings and their digital reproductions.

Results showed that there was a significant difference in heart rate between viewing the two real paintings, but no difference was found between the digital reproductions, or between the real and digital reproductions. No differences in heart rate variability were found.

Tschacher et al (2012)[19]

Monitored the physiology of visitors to an art museum using an electronic sensor glove which recorded physiological data and locomotion activity while they viewed the artworks. Afterwards, they were asked to rate the aesthetic qualities of some of the artworks.

Heart rate variability increased while viewing artworks that were deemed beautiful, high quality and surprising/humorous. Skin conductance variability increased, and heart rate decreased while viewing more dominant artworks (artworks experienced as dominant and stimulating by the viewers).

Wikström et al (1993)[20]

Investigated whether visual stimulation could improve the health of elderly women living alone. The women were randomised to either an intervention or control group. The intervention group were shown a selection of pictures, including artworks, and asked to discuss them, whereas the control group discussed current events. Blood pressure was measured at baseline, immediately after the intervention and four months later.

The intervention group had significantly lower systolic blood pressure than the control group after the intervention and at follow-up

Table 3

Overview of studies included in the review

| Study                     | Country        | Study Design                                               | Comparator Group                                                       | Setting                                 | Population (N)                                                                                                             | Stress Outcome Measures                                                  | Type and Content of Artwork                                                                                                                                        | Quantity of Artworks Viewed by Each Participant | Duration of Artwork Viewing                                     |
|---------------------------|----------------|------------------------------------------------------------|------------------------------------------------------------------------|-----------------------------------------|----------------------------------------------------------------------------------------------------------------------------|--------------------------------------------------------------------------|--------------------------------------------------------------------------------------------------------------------------------------------------------------------|-------------------------------------------------|-----------------------------------------------------------------|
| Clow & Fredhoi (2006)[15] | United Kingdom | Pre- and post-test, within groups quasi-experimental study | None                                                                   | Art gallery                             | Office workers<br>N=28 (25 included in the analysis)<br>Power analysis not performed                                       | Self-reported stress<br>Self-reported arousal<br>Salivary cortisol       | Physical artworks in a gallery- exact content not specified                                                                                                        | Not specified- gallery exhibition               | 35-40 minutes in the gallery                                    |
| D'Cunha et al (2019)[24]  | Australia      | Pre- and post-test, within groups quasi-experimental study | None                                                                   | Art gallery                             | People living with dementia<br>N=28 (22 included in the analysis)<br>Power analysis not performed                          | Salivary cortisol<br>interleukin-6                                       | Physical artworks in a gallery- exact content not specified                                                                                                        | 3-4 artworks each session, over 5-6 sessions    | 5-6x 90-minute sessions. Each artwork was viewed for 20 minutes |
| de Jong (1972)[14]        | Netherlands    | Between groups experimental study                          | Laboratory workers (non-art students)<br>Not randomised<br>Not blinded | Laboratory                              | Advanced art history students, advanced fine arts students and laboratory workers<br>N= 27<br>Power analysis not performed | Heart rate<br>Skin conductance<br>Respiration rate                       | Digital projections of 12 paintings considered 'beautiful' and 12 paintings considered 'ugly'                                                                      | 24                                              | Each painting was viewed for 10 seconds                         |
| Eisen et al (2008)[10]    | USA            | Pre- and post-test, randomised controlled trial            | Room with no artwork<br>Randomised<br>Not blinded                      | Hospital-patients' room                 | Paediatric patients (aged 5-17)<br>N=78<br>Power analysis not performed                                                    | Self-reported stress<br>Heart rate<br>Blood pressure<br>Respiratory rate | One group had a representational nature artwork hung on the wall, whereas the other group had an abstract artwork hung on the wall                                 | 1                                               | 2 hours                                                         |
| Karnik et al (2014)[21]   | USA            | Cross-sectional survey                                     | None                                                                   | Hospital-public spaces and clinic rooms | Hospital patients<br>N= 826<br>Power analysis not performed                                                                | Self-reported change in stress                                           | Physical collection of abstract and representational imagery (including nature imagery). Includes an assortment of artistic media; and a variety of subject matter | Collection of over 5300 artworks                | N/A                                                             |

1  
2  
3  
4  
5  
6  
7  
8  
9  
10  
11  
12  
13  
14  
15  
16  
17  
18  
19  
20  
21  
22  
23  
24  
25  
26  
27  
28  
29  
30  
31  
32  
33  
34  
35  
36  
37  
38  
39  
40  
41  
42  
43  
44  
45  
46

|                             |             |                                                             |                                                                                                                                  |                                        |                                                                                                         |                                                          |                                                                                                                                                                         |                                                                     |                                                             |
|-----------------------------|-------------|-------------------------------------------------------------|----------------------------------------------------------------------------------------------------------------------------------|----------------------------------------|---------------------------------------------------------------------------------------------------------|----------------------------------------------------------|-------------------------------------------------------------------------------------------------------------------------------------------------------------------------|---------------------------------------------------------------------|-------------------------------------------------------------|
| Krauss et al (2019)[16]     | Switzerland | Randomised controlled trial                                 | Group received only descriptive information about the artwork (compared to elaborative information)<br>Randomised<br>Not blinded | Art museum                             | General public aged between 18 and 35<br>N= 75<br>Power analysis performed                              | Heart rate<br>Heart rate variability<br>Skin conductance | Physical abstract paintings of Flemish expressionism                                                                                                                    | 6                                                                   | Not specified                                               |
| Kweon et al (2008)[22]      | USA         | Between groups experimental study                           | No artwork posters group<br>Randomised<br>Not blinded                                                                            | Laboratory (replicated office setting) | Psychology students<br>N=210<br>Power analysis not performed                                            | Self-reported stress                                     | Nature posters and abstract posters                                                                                                                                     | 4                                                                   | Not specified                                               |
| Law et al (2020)[25]        | New Zealand | Between groups experimental pilot study                     | Scrambled artwork images<br>Randomised<br>Blinded                                                                                | Laboratory                             | General public<br>N=30<br>Power analysis not performed                                                  | Salivary cortisol<br>Salivary alpha-amylase              | Digital slideshow of either landscape paintings or digitally scrambled versions of these paintings                                                                      | 26                                                                  | 30 minutes                                                  |
| Mastandrea et al (2019)[17] | Italy       | Between groups experimental study                           | Museum office<br>Randomised<br>Not blinded                                                                                       | Art museum                             | Undergraduate students<br>N=77<br>Power analysis not performed                                          | Blood pressure<br>Heart rate                             | Physical artworks in a gallery- including figurative artworks (e.g. landscapes and portraits) and modern artworks (e.g. abstract, impressionist and informal paintings) | Not specified- gallery exhibition                                   | 5 minutes                                                   |
| McCabe et al (2013)[9]      | Ireland     | Randomised prospective clinical trial                       | Room without the 'Open Window'<br>Randomised<br>Not blinded                                                                      | Hospital-patients' room                | Stem cell transplantation patients<br>N= 199 (164 included in the analysis)<br>Power analysis performed | Self-reported distress                                   | Virtual window, with artwork projections. Artwork collections ranged from visually complex abstract images to images of nature.                                         | Not specified- 9 art 'channels,' each with a collection of artworks | For the duration of their hospital stay-times not specified |
| Pearson et al (2019)[23]    | USA         | Pre- and post-test, between groups quasi-experimental study | Room without a window mural<br>Randomised<br>Blinded                                                                             | Hospital-patients' room                | Paediatric patients aged 2-18)<br>N=90<br>Power analysis not performed                                  | Heart rate<br>Systolic blood pressure                    | Window mural- either aquatic or forest themed                                                                                                                           | 1                                                                   | Minimum of 48 hours                                         |
| Siri et al (2018)[18]       | Italy       | Within groups experimental study                            | None                                                                                                                             | Art museum                             | General public<br>N=60                                                                                  | Heart rate                                               | 2 real abstract contemporary paintings                                                                                                                                  | 4                                                                   | 144 seconds per artwork                                     |

1  
2  
3  
4  
5  
6  
7  
8  
9  
10  
11  
12  
13  
14  
15  
16  
17  
18  
19  
20  
21  
22  
23  
24  
25  
26  
27  
28  
29  
30  
31  
32  
33  
34  
35  
36  
37  
38  
39  
40  
41  
42  
43  
44  
45  
46

|                            |             |                                                |                                                                 |                          |                                                                                      |                                                          |                                                                                                                                               |                                                |                                                                                                |
|----------------------------|-------------|------------------------------------------------|-----------------------------------------------------------------|--------------------------|--------------------------------------------------------------------------------------|----------------------------------------------------------|-----------------------------------------------------------------------------------------------------------------------------------------------|------------------------------------------------|------------------------------------------------------------------------------------------------|
|                            |             |                                                |                                                                 |                          | Power analysis not performed                                                         | Heart rate variability                                   | and their digitally produced replicates                                                                                                       |                                                |                                                                                                |
| Tschacher et al (2012)[19] | Switzerland | Within groups quasi-experimental study         | None                                                            | Art museum               | Museum visitors N=517 (373 included in the analysis)<br>Power analysis not performed | Skin conductance<br>Heart rate<br>Heart rate variability | Physical modern and contemporary art exhibition                                                                                               | 76                                             | No specific timeframe given to participants. On average, they spent 28 minutes at the gallery. |
| Wikström et al (1993)[20]  | Sweden      | Pre- and post-test randomised controlled trial | Group that were not shown artworks<br>Randomised<br>Not blinded | Senior citizen apartment | Women aged over 70 N=40<br>Power analysis not performed                              | Systolic blood pressure                                  | Physical pictures-ranging from artworks of nature, flowers and people, abstract patterns, white figures on black backgrounds and photographs. | Not specified how many each participant viewed | Not specified                                                                                  |

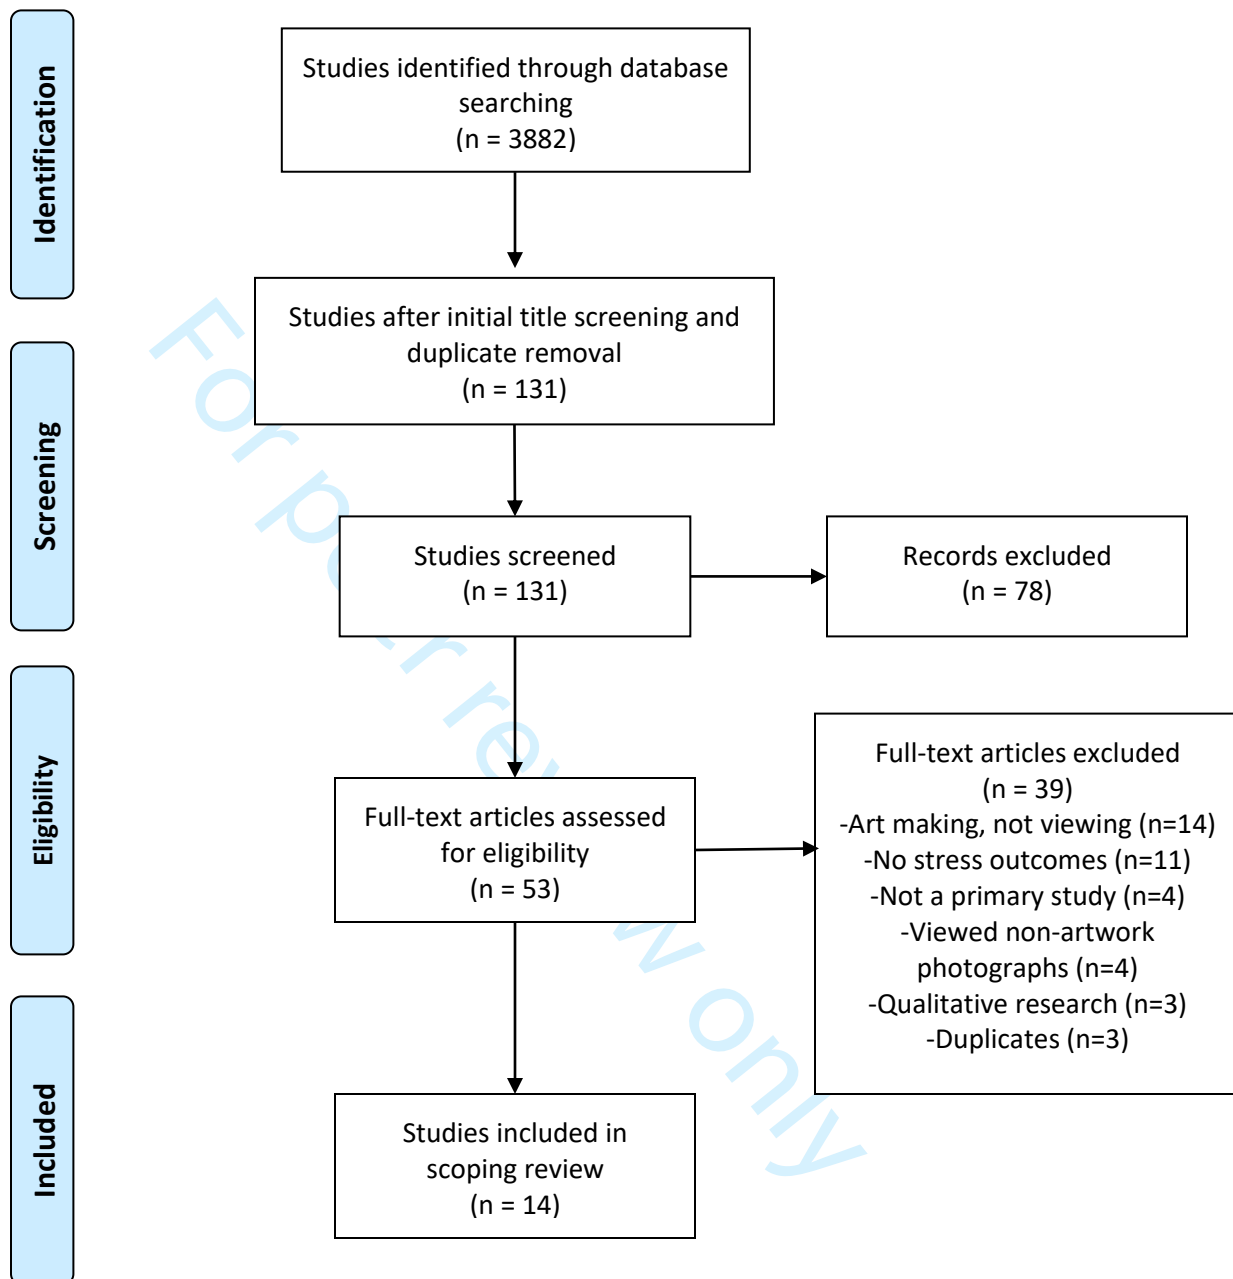

## Preferred Reporting Items for Systematic reviews and Meta-Analyses extension for Scoping Reviews (PRISMA-ScR) Checklist

| SECTION                                               | ITEM | PRISMA-ScR CHECKLIST ITEM                                                                                                                                                                                                                                                                                  | REPORTED ON PAGE # |
|-------------------------------------------------------|------|------------------------------------------------------------------------------------------------------------------------------------------------------------------------------------------------------------------------------------------------------------------------------------------------------------|--------------------|
| <b>TITLE</b>                                          |      |                                                                                                                                                                                                                                                                                                            |                    |
| Title                                                 | 1    | Identify the report as a scoping review.                                                                                                                                                                                                                                                                   |                    |
| <b>ABSTRACT</b>                                       |      |                                                                                                                                                                                                                                                                                                            |                    |
| Structured summary                                    | 2    | Provide a structured summary that includes (as applicable): background, objectives, eligibility criteria, sources of evidence, charting methods, results, and conclusions that relate to the review questions and objectives.                                                                              |                    |
| <b>INTRODUCTION</b>                                   |      |                                                                                                                                                                                                                                                                                                            |                    |
| Rationale                                             | 3    | Describe the rationale for the review in the context of what is already known. Explain why the review questions/objectives lend themselves to a scoping review approach.                                                                                                                                   |                    |
| Objectives                                            | 4    | Provide an explicit statement of the questions and objectives being addressed with reference to their key elements (e.g., population or participants, concepts, and context) or other relevant key elements used to conceptualize the review questions and/or objectives.                                  |                    |
| <b>METHODS</b>                                        |      |                                                                                                                                                                                                                                                                                                            |                    |
| Protocol and registration                             | 5    | Indicate whether a review protocol exists; state if and where it can be accessed (e.g., a Web address); and if available, provide registration information, including the registration number.                                                                                                             |                    |
| Eligibility criteria                                  | 6    | Specify characteristics of the sources of evidence used as eligibility criteria (e.g., years considered, language, and publication status), and provide a rationale.                                                                                                                                       |                    |
| Information sources*                                  | 7    | Describe all information sources in the search (e.g., databases with dates of coverage and contact with authors to identify additional sources), as well as the date the most recent search was executed.                                                                                                  |                    |
| Search                                                | 8    | Present the full electronic search strategy for at least 1 database, including any limits used, such that it could be repeated.                                                                                                                                                                            |                    |
| Selection of sources of evidence†                     | 9    | State the process for selecting sources of evidence (i.e., screening and eligibility) included in the scoping review.                                                                                                                                                                                      |                    |
| Data charting process‡                                | 10   | Describe the methods of charting data from the included sources of evidence (e.g., calibrated forms or forms that have been tested by the team before their use, and whether data charting was done independently or in duplicate) and any processes for obtaining and confirming data from investigators. |                    |
| Data items                                            | 11   | List and define all variables for which data were sought and any assumptions and simplifications made.                                                                                                                                                                                                     |                    |
| Critical appraisal of individual sources of evidence§ | 12   | If done, provide a rationale for conducting a critical appraisal of included sources of evidence; describe the methods used and how this information was used in any data synthesis (if appropriate).                                                                                                      |                    |
| Synthesis of results                                  | 13   | Describe the methods of handling and summarizing the data that were charted.                                                                                                                                                                                                                               |                    |

| SECTION                                       | ITEM | PRISMA-ScR CHECKLIST ITEM                                                                                                                                                                       | REPORTED ON PAGE # |
|-----------------------------------------------|------|-------------------------------------------------------------------------------------------------------------------------------------------------------------------------------------------------|--------------------|
| <b>RESULTS</b>                                |      |                                                                                                                                                                                                 |                    |
| Selection of sources of evidence              | 14   | Give numbers of sources of evidence screened, assessed for eligibility, and included in the review, with reasons for exclusions at each stage, ideally using a flow diagram.                    |                    |
| Characteristics of sources of evidence        | 15   | For each source of evidence, present characteristics for which data were charted and provide the citations.                                                                                     |                    |
| Critical appraisal within sources of evidence | 16   | If done, present data on critical appraisal of included sources of evidence (see item 12).                                                                                                      |                    |
| Results of individual sources of evidence     | 17   | For each included source of evidence, present the relevant data that were charted that relate to the review questions and objectives.                                                           |                    |
| Synthesis of results                          | 18   | Summarize and/or present the charting results as they relate to the review questions and objectives.                                                                                            |                    |
| <b>DISCUSSION</b>                             |      |                                                                                                                                                                                                 |                    |
| Summary of evidence                           | 19   | Summarize the main results (including an overview of concepts, themes, and types of evidence available), link to the review questions and objectives, and consider the relevance to key groups. |                    |
| Limitations                                   | 20   | Discuss the limitations of the scoping review process.                                                                                                                                          |                    |
| Conclusions                                   | 21   | Provide a general interpretation of the results with respect to the review questions and objectives, as well as potential implications and/or next steps.                                       |                    |
| <b>FUNDING</b>                                |      |                                                                                                                                                                                                 |                    |
| Funding                                       | 22   | Describe sources of funding for the included sources of evidence, as well as sources of funding for the scoping review. Describe the role of the funders of the scoping review.                 |                    |

JBI = Joanna Briggs Institute; PRISMA-ScR = Preferred Reporting Items for Systematic reviews and Meta-Analyses extension for Scoping Reviews.

\* Where *sources of evidence* (see second footnote) are compiled from, such as bibliographic databases, social media platforms, and Web sites.

† A more inclusive/heterogeneous term used to account for the different types of evidence or data sources (e.g., quantitative and/or qualitative research, expert opinion, and policy documents) that may be eligible in a scoping review as opposed to only studies. This is not to be confused with *information sources* (see first footnote).

‡ The frameworks by Arksey and O'Malley (6) and Levac and colleagues (7) and the JBI guidance (4, 5) refer to the process of data extraction in a scoping review as data charting.

§ The process of systematically examining research evidence to assess its validity, results, and relevance before using it to inform a decision. This term is used for items 12 and 19 instead of "risk of bias" (which is more applicable to systematic reviews of interventions) to include and acknowledge the various sources of evidence that may be used in a scoping review (e.g., quantitative and/or qualitative research, expert opinion, and policy document).

From: Tricco AC, Lillie E, Zarin W, O'Brien KK, Colquhoun H, Levac D, et al. PRISMA Extension for Scoping Reviews (PRISMA-ScR): Checklist and Explanation. *Ann Intern Med.* ;169:467–473. doi: 10.7326/M18-0850



Supplement: bmjopen-2020-043549.draft_revisions.pdf [file bmjopen-2020-043549.draft_revisions.pdf]
